# Supplementary material
Source: Research Square preprint supplement (doi:10.21203/rs.3.rs-9130713/v1)
Supplement: Supplementary file 1 [file 1c9da622cc759665735f240f.xlsx]

## Sheet: AWARENESS, PERCEPTIONS, AND ...
start	end	Age	Gender	Level of education	Professional role	Years of experience in healthcare	Department	Have you heard about mpox?	If yes, where did you first hear about mpox?	How familiar are you with the symptoms of mpox?	Which of the following do you believe are symptoms of mpox?	Which of the following do you believe are symptoms of mpox?/Fever	Which of the following do you believe are symptoms of mpox?/Rash	Which of the following do you believe are symptoms of mpox?/Headache	Which of the following do you believe are symptoms of mpox?/Muscle aches	Which of the following do you believe are symptoms of mpox?/Swollen lymph nodes	Which of the following do you believe are symptoms of mpox?/Difficulty breathing	Which of the following do you believe are symptoms of mpox?/Skin lesions	Which of the following do you believe are symptoms of mpox?/None of the above	How is mpox transmitted?	How is mpox transmitted?/Contact with infected animals	How is mpox transmitted?/Direct contact with skin lesions of an infected person	How is mpox transmitted?/Respiratory droplets	How is mpox transmitted?/Sexual contact	How is mpox transmitted?/Touching contaminated objects or surfaces	How is mpox transmitted?/I don't know	Do you think mpox poses a significant public health risk in Nigeria?	Compared to other infectious diseases (e.g., COVID-19, ebola), how would you rate the seriousness of mpox?	Do you believe mpox can cause widespread outbreaks in Nigeria if not properly managed?	How concerned are you about the possibility of contracting mpox while working in healthcare?	Do you think there is sufficient public awareness about mpox in Nigeria?	Do you believe that mpox vaccines should be made available to health workers in high risk areas?	Has your healthcare facility provided you with training or resources on managing mpox cases?	If yes, what type of training have you received?	Do you feel confident in your ability to identify and manage a suspected mpox case?	Does your facility have protocols in place to manage mpox outbreaks?	Which of the following preventive measures are you familiar with for mpox?	Which of the following preventive measures are you familiar with for mpox?/Isolation of infected patients	Which of the following preventive measures are you familiar with for mpox?/Use of personal protective equipment	Which of the following preventive measures are you familiar with for mpox?/Disinfection of contaminated surfaces	Which of the following preventive measures are you familiar with for mpox?/Quarantine of suspected cases	Which of the following preventive measures are you familiar with for mpox?/Vaccination	Which of the following preventive measures are you familiar with for mpox?/I am not familiar with any preventive measures	Which of the following facilities, materials, or equipment are available at your healthcare facility to manage mpox outbreaks?	Which of the following facilities, materials, or equipment are available at your healthcare facility to manage mpox outbreaks?/Isolation wards/rooms	Which of the following facilities, materials, or equipment are available at your healthcare facility to manage mpox outbreaks?/Personal Protective Equipment (e.g gloves, masks, gowns)	Which of the following facilities, materials, or equipment are available at your healthcare facility to manage mpox outbreaks?/Hand washing stations with soap and water	Which of the following facilities, materials, or equipment are available at your healthcare facility to manage mpox outbreaks?/Alcohol based hand sanitizer	Which of the following facilities, materials, or equipment are available at your healthcare facility to manage mpox outbreaks?/Disinfectants for surface cleaning
2025-07-04 15:05:00	2025-07-04 15:11:52	25	Female	Bachelor's degree	Pharmacist	Less than 5 years	Others	Yes	TV/Radio	Somewhat familiar	Fever Rash Headache Muscle aches Swollen lymph nodes Skin lesions	1	1	1	1	1	0	1	0	Contact with infected animals Direct contact with skin lesions of an infected person Respiratory droplets Sexual contact Touching contaminated objects or surfaces	1	1	1	1	1	0	Yes	Equally serious	Yes	Very concerned	Yes	Strongly agree	No		Somewhat confident	Not sure	Isolation of infected patients Use of personal protective equipment Disinfection of contaminated surfaces Quarantine of suspected cases Vaccination	1	1	1	1	1	0	Isolation wards/rooms Personal Protective Equipment (e.g gloves, masks, gowns) Hand washing stations with soap and water Disinfectants for surface cleaning Laboratory facilities for diagnostic testing Mpox-specific diagnostic kits Vaccine for mpox prevention Stock of antiviral medications for mpox treatment Rapid response team or taskforce for outbreak management Communication and reporting tools…	1	1	1	0	1
2025-07-04 15:11:52	2025-07-04 18:14:55	35	Female	Bachelor's degree	Nurses	5-10 years	Others	Yes	Social media	Somewhat familiar	Skin lesions	0	0	0	0	0	0	1	0	Contact with infected animals Direct contact with skin lesions of an infected person Touching contaminated objects or surfaces	1	1	0	0	1	0	No	Equally serious	Yes	Very concerned	Not sure	Agree	No		Not confident at all	No	Isolation of infected patients Use of personal protective equipment	1	1	0	0	0	0	Laboratory facilities for diagnostic testing	0	0	0	0	0
2025-07-04 18:14:55	2025-07-04 18:17:04	31	Female	Bachelor's degree	Medical laboratory scientist	Less than 5 years	Laboratory Services	No		Not familiar at all	None of the above	0	0	0	0	0	0	0	1	I don't know	0	0	0	0	0	1	Yes	Equally serious	Yes	Very concerned	No	Strongly agree	No		Not confident at all	Not sure	I am not familiar with any preventive measures	0	0	0	0	0	1	Personal Protective Equipment (e.g gloves, masks, gowns) Hand washing stations with soap and water Alcohol based hand sanitizer Disinfectants for surface cleaning Communication and reporting tools (e.g., phones, computer, internet access)	0	1	1	1	1
2025-07-04 18:17:04	2025-07-04 18:19:19	30	Male	Bachelor's degree	Nurses	Less than 5 years	Others	Yes	Scientific journals	Very familiar	Fever	1	0	0	0	0	0	0	0	Direct contact with skin lesions of an infected person	0	1	0	0	0	0	Yes	Equally serious	Yes	Very concerned	No	Strongly agree	No		Very confident	Yes	Isolation of infected patients	1	0	0	0	0	0	Personal Protective Equipment (e.g gloves, masks, gowns)	0	1	0	0	0
2025-07-04 18:19:19	2025-07-04 18:21:36	26	Female	Bachelor's degree	Nurses	Less than 5 years	Others	Yes	Colleagues/workplace	Somewhat familiar	Fever Rash Headache Skin lesions	1	1	1	0	0	0	1	0	Contact with infected animals Direct contact with skin lesions of an infected person	1	1	0	0	0	0	Yes	Equally serious	Yes	Very concerned	No	Strongly agree	No		Somewhat confident	Not sure	Isolation of infected patients Use of personal protective equipment Disinfection of contaminated surfaces Quarantine of suspected cases Vaccination	1	1	1	1	1	0	Personal Protective Equipment (e.g gloves, masks, gowns) Hand washing stations with soap and water Alcohol based hand sanitizer Disinfectants for surface cleaning Laboratory facilities for diagnostic testing Stock of antiviral medications for mpox treatment Communication and reporting tools (e.g., phones, computer, internet access) Adequate waste disposal system for medical waste Ambulance servic…	0	1	1	1	1
2025-07-04 18:21:36	2025-07-04 18:25:30	24	Male	Bachelor's degree	Doctor	Less than 5 years	Others	Yes	TV/Radio	Somewhat familiar	Fever Rash Swollen lymph nodes	1	1	0	0	1	0	0	0	Contact with infected animals Sexual contact	1	0	0	1	0	0	Yes	Equally serious	Yes	Very concerned					Not confident at all	Not sure	Isolation of infected patients Use of personal protective equipment Disinfection of contaminated surfaces Quarantine of suspected cases	1	1	1	1	0	0	Personal Protective Equipment (e.g gloves, masks, gowns) Hand washing stations with soap and water Disinfectants for surface cleaning Laboratory facilities for diagnostic testing Communication and reporting tools (e.g., phones, computer, internet access)	0	1	1	0	1
2025-07-04 18:25:30	2025-07-04 18:28:02		Female	Bachelor's degree	Nurses	Less than 5 years	Others	Yes	Colleagues/workplace	Somewhat familiar	Fever Rash Headache Muscle aches Swollen lymph nodes Difficulty breathing Skin lesions	1	1	1	1	1	1	1	0	Contact with infected animals Direct contact with skin lesions of an infected person Respiratory droplets Sexual contact Touching contaminated objects or surfaces	1	1	1	1	1	0	Yes	Equally serious	Yes	Very concerned	No	Strongly agree	No		Somewhat confident	No	Isolation of infected patients Use of personal protective equipment Disinfection of contaminated surfaces Quarantine of suspected cases Vaccination	1	1	1	1	1	0	Isolation wards/rooms Personal Protective Equipment (e.g gloves, masks, gowns) Hand washing stations with soap and water Alcohol based hand sanitizer Disinfectants for surface cleaning Laboratory facilities for diagnostic testing Communication and reporting tools (e.g., phones, computer, internet access) Standard treatment guidelines or protocol for mpox Training programs for health workers on mp…	1	1	1	1	1
2025-07-04 18:28:02	2025-07-04 18:30:24	46	Male	Bachelor's degree	Doctor	Less than 5 years	Others	Yes	Colleagues/workplace	Somewhat familiar	Fever Rash Swollen lymph nodes Skin lesions	1	1	0	0	1	0	1	0	Direct contact with skin lesions of an infected person Respiratory droplets Sexual contact Touching contaminated objects or surfaces	0	1	1	1	1	0	Yes	More serious	Yes	Very concerned	No	Strongly agree	No		Somewhat confident	Not sure	Isolation of infected patients Use of personal protective equipment Disinfection of contaminated surfaces Quarantine of suspected cases	1	1	1	1	0	0	Hand washing stations with soap and water Alcohol based hand sanitizer Disinfectants for surface cleaning Laboratory facilities for diagnostic testing Communication and reporting tools (e.g., phones, computer, internet access) Adequate waste disposal system for medical waste Adequate electricity supply and backup generators Community awareness and education materials on mpox prevention	0	0	1	1	1
2025-07-04 18:30:24	2025-07-04 18:31:55	30	Female	Bachelor's degree	Nurses	Less than 5 years	Others	Yes	Colleagues/workplace	Very familiar	Skin lesions	0	0	0	0	0	0	1	0	Contact with infected animals	1	0	0	0	0	0	Yes	More serious	Yes	Very concerned	Yes	Strongly agree	Yes	In-person Training	Very confident	Yes	Isolation of infected patients	1	0	0	0	0	0	Hand washing stations with soap and water	0	0	1	0	0
2025-07-04 18:31:55	2025-07-04 18:33:59	53	Male	Postgraduate degree	Doctor	11-15 years	Others	Yes	Social media	Somewhat familiar	Fever Rash Headache Muscle aches Swollen lymph nodes Skin lesions	1	1	1	1	1	0	1	0	Contact with infected animals Direct contact with skin lesions of an infected person Respiratory droplets Touching contaminated objects or surfaces	1	1	1	0	1	0	Yes	Less serious	Yes	Very concerned	No	Agree	No		Somewhat confident	No	Isolation of infected patients Use of personal protective equipment Disinfection of contaminated surfaces Quarantine of suspected cases Vaccination	1	1	1	1	1	0	Isolation wards/rooms Personal Protective Equipment (e.g gloves, masks, gowns) Hand washing stations with soap and water Alcohol based hand sanitizer Disinfectants for surface cleaning Laboratory facilities for diagnostic testing Rapid response team or taskforce for outbreak management Adequate waste disposal system for medical waste Ambulance services for patient transfer Adequate electricity su…	1	1	1	1	1
2025-07-04 18:33:59	2025-07-04 18:35:45	55	Male	Postgraduate degree	Doctor	More than 15 years	Others	Yes	TV/Radio	Somewhat familiar	Fever Rash Headache Muscle aches Swollen lymph nodes Difficulty breathing Skin lesions	1	1	1	1	1	1	1	0	Contact with infected animals Direct contact with skin lesions of an infected person Respiratory droplets Sexual contact Touching contaminated objects or surfaces	1	1	1	1	1	0	Yes	Equally serious	Yes	Very concerned	Yes	Strongly agree	No		Somewhat confident	No	Isolation of infected patients Use of personal protective equipment Disinfection of contaminated surfaces Quarantine of suspected cases	1	1	1	1	0	0	Isolation wards/rooms Personal Protective Equipment (e.g gloves, masks, gowns) Hand washing stations with soap and water Alcohol based hand sanitizer Disinfectants for surface cleaning	1	1	1	1	1
2025-07-04 18:35:45	2025-07-04 18:37:51		Male	Postgraduate degree	Public Health Officer	Less than 5 years	Infectious Diseases	Yes	TV/Radio	Somewhat familiar	Fever Rash Headache	1	1	1	0	0	0	0	0								Yes	Less serious	Yes	Moderately concerned	No	Agree	No		Somewhat confident	Not sure	Isolation of infected patients Use of personal protective equipment Disinfection of contaminated surfaces Quarantine of suspected cases Vaccination	1	1	1	1	1	0	Isolation wards/rooms Personal Protective Equipment (e.g gloves, masks, gowns) Hand washing stations with soap and water Alcohol based hand sanitizer Disinfectants for surface cleaning Laboratory facilities for diagnostic testing Communication and reporting tools (e.g., phones, computer, internet access) Adequate waste disposal system for medical waste Ambulance services for patient transfer	1	1	1	1	1
2025-07-04 18:37:51	2025-07-04 18:39:09	24	Male	Bachelor's degree	Nurses	Less than 5 years	Emergency Care	Yes	Colleagues/workplace	Very familiar	Skin lesions	0	0	0	0	0	0	1	0	Contact with infected animals	1	0	0	0	0	0	Yes	Equally serious	Yes	Very concerned	No	Strongly agree	Yes	In-person Training	Very confident	Yes	Isolation of infected patients	1	0	0	0	0	0	Isolation wards/rooms	1	0	0	0	0
2025-07-04 18:39:09	2025-07-04 18:41:09		Female	Bachelor's degree	Nurses	5-10 years	Infectious Diseases	Yes	Colleagues/workplace	Somewhat familiar	Fever Rash Headache Muscle aches Swollen lymph nodes Difficulty breathing	1	1	1	1	1	1	0	0	Contact with infected animals Direct contact with skin lesions of an infected person Respiratory droplets Sexual contact	1	1	1	1	0	0	Yes	More serious	Yes	Very concerned	Not sure	Strongly agree	No		Somewhat confident	Not sure	Isolation of infected patients Use of personal protective equipment Disinfection of contaminated surfaces Quarantine of suspected cases	1	1	1	1	0	0	Isolation wards/rooms Personal Protective Equipment (e.g gloves, masks, gowns) Hand washing stations with soap and water Alcohol based hand sanitizer Disinfectants for surface cleaning Laboratory facilities for diagnostic testing Mpox-specific diagnostic kits Vaccine for mpox prevention Stock of antiviral medications for mpox treatment Rapid response team or taskforce for outbreak management Comm…	1	1	1	1	1
2025-07-04 18:41:09	2025-07-04 18:47:07	49	Female	Bachelor's degree	Nurses	11-15 years	Others	Yes	TV/Radio	Somewhat familiar	Fever Rash Headache Muscle aches Swollen lymph nodes Difficulty breathing Skin lesions	1	1	1	1	1	1	1	0	Contact with infected animals Direct contact with skin lesions of an infected person Respiratory droplets Sexual contact Touching contaminated objects or surfaces	1	1	1	1	1	0	Yes	Equally serious	Yes	Very concerned	Not sure	Agree	No		Somewhat confident	Yes	Isolation of infected patients Use of personal protective equipment Disinfection of contaminated surfaces Quarantine of suspected cases Vaccination	1	1	1	1	1	0	Isolation wards/rooms Personal Protective Equipment (e.g gloves, masks, gowns) Hand washing stations with soap and water Alcohol based hand sanitizer Disinfectants for surface cleaning Laboratory facilities for diagnostic testing Stock of antiviral medications for mpox treatment Rapid response team or taskforce for outbreak management Communication and reporting tools (e.g., phones, computer, int…	1	1	1	1	1
2025-07-04 18:47:07	2025-07-04 18:49:38		Female	Bachelor's degree	Others	5-10 years	Others	Yes	Others	Somewhat familiar	Fever Rash Headache Muscle aches Difficulty breathing Skin lesions	1	1	1	1	0	1	1	0	Contact with infected animals Direct contact with skin lesions of an infected person Respiratory droplets Touching contaminated objects or surfaces	1	1	1	0	1	0	Yes	Equally serious	Yes	Very concerned	No	Strongly agree	No		Somewhat confident	Not sure	Isolation of infected patients Use of personal protective equipment Disinfection of contaminated surfaces Quarantine of suspected cases Vaccination	1	1	1	1	1	0
2025-07-04 18:49:38	2025-07-04 18:51:15	36	Male	Postgraduate degree	Others	More than 15 years	Others	Yes	Social media	Very familiar	Fever Rash Headache Muscle aches Swollen lymph nodes Skin lesions	1	1	1	1	1	0	1	0	Contact with infected animals Direct contact with skin lesions of an infected person Touching contaminated objects or surfaces	1	1	0	0	1	0	Yes	Equally serious	Yes	Very concerned	No	Strongly agree	No		Not confident at all	No	Isolation of infected patients Use of personal protective equipment Disinfection of contaminated surfaces Quarantine of suspected cases	1	1	1	1	0	0	Personal Protective Equipment (e.g gloves, masks, gowns) Hand washing stations with soap and water Alcohol based hand sanitizer Disinfectants for surface cleaning	0	1	1	1	1
2025-07-04 18:51:15	2025-07-04 18:53:33	44	Male	Postgraduate degree	Doctor	More than 15 years	Others	Yes	Scientific journals	Very familiar	Fever Rash Headache Muscle aches Skin lesions	1	1	1	1	0	0	1	0	Contact with infected animals Direct contact with skin lesions of an infected person Respiratory droplets	1	1	1	0	0	0	Yes	Equally serious	Yes	Very concerned	No	Strongly agree	Not sure		Not confident at all	Not sure	Isolation of infected patients Use of personal protective equipment Disinfection of contaminated surfaces Quarantine of suspected cases Vaccination	1	1	1	1	1	0	Isolation wards/rooms Personal Protective Equipment (e.g gloves, masks, gowns) Hand washing stations with soap and water Alcohol based hand sanitizer Disinfectants for surface cleaning Laboratory facilities for diagnostic testing	1	1	1	1	1
2025-07-04 18:53:33	2025-07-04 19:00:21			Bachelor's degree	Others	Less than 5 years	Others	Yes	Social media	Not familiar at all	Rash	0	1	0	0	0	0	0	0	Contact with infected animals	1	0	0	0	0	0	Not sure	Equally serious	Yes	Moderately concerned	No	Agree	No		Not confident at all	No	Use of personal protective equipment	0	1	0	0	0	0	Personal Protective Equipment (e.g gloves, masks, gowns)	0	1	0	0	0
2025-07-04 19:00:21	2025-07-04 19:06:07		Female	Bachelor's degree	Others	Less than 5 years	Others	Yes	TV/Radio	Somewhat familiar	Fever Rash Headache Muscle aches Swollen lymph nodes Difficulty breathing	1	1	1	1	1	1	0	0	Contact with infected animals	1	0	0	0	0	0	Yes	Equally serious	Yes	Not concerned at all	No	Agree	No		Not confident at all	No	Isolation of infected patients Use of personal protective equipment Disinfection of contaminated surfaces Quarantine of suspected cases Vaccination	1	1	1	1	1	0	Isolation wards/rooms Personal Protective Equipment (e.g gloves, masks, gowns) Hand washing stations with soap and water Alcohol based hand sanitizer Disinfectants for surface cleaning Laboratory facilities for diagnostic testing Communication and reporting tools (e.g., phones, computer, internet access) Adequate waste disposal system for medical waste Ambulance services for patient transfer Adeq…	1	1	1	1	1
2025-07-04 19:06:07	2025-07-04 19:09:15	40	Female	Diploma/Certificate	Others	5-10 years	Others	Yes	TV/Radio	Somewhat familiar	Fever Rash	1	1	0	0	0	0	0	0								Not sure	Less serious	Yes	Very concerned	No	Agree	No		Not confident at all	Not sure	I am not familiar with any preventive measures	0	0	0	0	0	1
2025-07-04 19:09:15	2025-07-04 19:11:50		Female	Bachelor's degree	Others	Less than 5 years	Others	Yes	TV/Radio	Somewhat familiar	Fever Rash Headache	1	1	1	0	0	0	0	0	Contact with infected animals	1	0	0	0	0	0	Yes	Equally serious	Yes	Very concerned	Not sure	Strongly agree	No		Somewhat confident	Not sure	Isolation of infected patients Quarantine of suspected cases	1	0	0	1	0	0	Isolation wards/rooms Personal Protective Equipment (e.g gloves, masks, gowns) Hand washing stations with soap and water Alcohol based hand sanitizer Disinfectants for surface cleaning Laboratory facilities for diagnostic testing Mpox-specific diagnostic kits Vaccine for mpox prevention Stock of antiviral medications for mpox treatment Rapid response team or taskforce for outbreak management Comm…	1	1	1	1	1
2025-07-04 19:11:50	2025-07-04 19:14:01		Male	Bachelor's degree	Others	Less than 5 years	Others	Yes	TV/Radio	Somewhat familiar	Fever Rash Headache	1	1	1	0	0	0	0	0	Contact with infected animals	1	0	0	0	0	0	Yes	Equally serious	Yes	Very concerned	Not sure	Strongly agree	No		Somewhat confident	Not sure	Isolation of infected patients Use of personal protective equipment Disinfection of contaminated surfaces	1	1	1	0	0	0	Isolation wards/rooms Personal Protective Equipment (e.g gloves, masks, gowns) Hand washing stations with soap and water Alcohol based hand sanitizer Disinfectants for surface cleaning Laboratory facilities for diagnostic testing Mpox-specific diagnostic kits Vaccine for mpox prevention Stock of antiviral medications for mpox treatment Rapid response team or taskforce for outbreak management Comm…	1	1	1	1	1
2025-07-04 19:14:01	2025-07-04 19:15:48		Female	Bachelor's degree	Medical laboratory scientist	5-10 years	Laboratory Services	Yes	TV/Radio	Somewhat familiar	Fever Rash Headache Muscle aches Swollen lymph nodes Difficulty breathing Skin lesions	1	1	1	1	1	1	1	0	Contact with infected animals Direct contact with skin lesions of an infected person	1	1	0	0	0	0	Yes	Equally serious	Yes	Very concerned	Yes	Strongly agree	No		Somewhat confident	No	Isolation of infected patients Use of personal protective equipment Disinfection of contaminated surfaces Quarantine of suspected cases	1	1	1	1	0	0
2025-07-04 19:15:48	2025-07-04 19:18:25		Female	Bachelor's degree	Medical laboratory scientist	Less than 5 years	Laboratory Services	Yes	Colleagues/workplace	Not familiar at all	Rash	0	1	0	0	0	0	0	0	I don't know	0	0	0	0	0	1	Yes	Not serious at all	Not sure		No	Strongly agree	No		Not confident at all	No	Use of personal protective equipment	0	1	0	0	0	0	Personal Protective Equipment (e.g gloves, masks, gowns) Alcohol based hand sanitizer Community awareness and education materials on mpox prevention Emergency funds or budget allocation for outbreak response	0	1	0	1	0
2025-07-04 19:18:25	2025-07-04 19:21:24	44	Male	Postgraduate degree	Medical laboratory scientist	More than 15 years	Laboratory Services	Yes	TV/Radio	Not familiar at all	Rash	0	1	0	0	0	0	0	0	Direct contact with skin lesions of an infected person	0	1	0	0	0	0	Yes	Equally serious	Yes	Very concerned		Strongly agree	No		Not confident at all	Not sure	Quarantine of suspected cases	0	0	0	1	0	0	Personal Protective Equipment (e.g gloves, masks, gowns) Adequate waste disposal system for medical waste Ambulance services for patient transfer Adequate electricity supply and backup generators Cold chain storage for vaccines or laboratory specimens	0	1	0	0	0
2025-07-04 19:21:24	2025-07-04 19:23:38	35	Female	Bachelor's degree	Medical laboratory scientist	5-10 years	Laboratory Services	Yes	Colleagues/workplace	Not familiar at all	Fever Headache	1	0	1	0	0	0	0	0	Contact with infected animals Direct contact with skin lesions of an infected person Touching contaminated objects or surfaces	1	1	0	0	1	0	Yes	More serious	Yes	Very concerned	Yes	Agree	Yes		Somewhat confident	No	Isolation of infected patients Use of personal protective equipment Disinfection of contaminated surfaces Quarantine of suspected cases Vaccination	1	1	1	1	1	0	Personal Protective Equipment (e.g gloves, masks, gowns) Hand washing stations with soap and water Alcohol based hand sanitizer Disinfectants for surface cleaning Adequate waste disposal system for medical waste Ambulance services for patient transfer Adequate electricity supply and backup generators Cold chain storage for vaccines or laboratory specimens	0	1	1	1	1
2025-07-04 19:23:38	2025-07-05 08:25:47	34	Female	Bachelor's degree	Nurses	Less than 5 years	Emergency Care	Yes	Colleagues/workplace		Fever Headache Muscle aches Swollen lymph nodes	1	0	1	1	1	0	0	0	Direct contact with skin lesions of an infected person Respiratory droplets Touching contaminated objects or surfaces	0	1	1	0	1	0	Yes	Less serious	Yes		Not sure	Agree	Not sure		Somewhat confident	Not sure	Isolation of infected patients Use of personal protective equipment Disinfection of contaminated surfaces Quarantine of suspected cases Vaccination	1	1	1	1	1	0	Isolation wards/rooms Personal Protective Equipment (e.g gloves, masks, gowns) Hand washing stations with soap and water Alcohol based hand sanitizer Disinfectants for surface cleaning Communication and reporting tools (e.g., phones, computer, internet access) Ambulance services for patient transfer	1	1	1	1	1
2025-07-05 08:25:48	2025-07-05 08:27:52		Male	Bachelor's degree	Pharmacist	Less than 5 years	Others	Yes	Scientific journals	Somewhat familiar	Fever Rash Headache Muscle aches Swollen lymph nodes Skin lesions	1	1	1	1	1	0	1	0	Contact with infected animals Direct contact with skin lesions of an infected person	1	1	0	0	0	0	Yes	Less serious	Yes	Moderately concerned	No	Strongly agree	No		Very confident	No	Isolation of infected patients Use of personal protective equipment Disinfection of contaminated surfaces	1	1	1	0	0	0	Isolation wards/rooms Personal Protective Equipment (e.g gloves, masks, gowns) Hand washing stations with soap and water Disinfectants for surface cleaning Adequate waste disposal system for medical waste Ambulance services for patient transfer Adequate electricity supply and backup generators	1	1	1	0	1
2025-07-05 08:27:52	2025-07-05 08:29:33	37	Female	Bachelor's degree	Pharmacist	11-15 years	Others	Yes	Colleagues/workplace	Somewhat familiar	Fever Muscle aches Swollen lymph nodes Difficulty breathing Skin lesions	1	0	0	1	1	1	1	0	Contact with infected animals Direct contact with skin lesions of an infected person Sexual contact	1	1	0	1	0	0	Yes	Equally serious	Yes	Very concerned	No	Agree	No		Somewhat confident	Not sure	Isolation of infected patients Use of personal protective equipment Disinfection of contaminated surfaces Quarantine of suspected cases	1	1	1	1	0	0	Hand washing stations with soap and water Alcohol based hand sanitizer Disinfectants for surface cleaning Laboratory facilities for diagnostic testing	0	0	1	1	1
2025-07-05 08:29:33	2025-07-05 08:31:06	25	Female	Bachelor's degree	Medical laboratory scientist	Less than 5 years	Laboratory Services	Yes	Colleagues/workplace	Somewhat familiar	Fever Rash	1	1	0	0	0	0	0	0	Contact with infected animals Direct contact with skin lesions of an infected person	1	1	0	0	0	0	Yes	Equally serious	Yes	Very concerned	No	Strongly agree	No		Not confident at all	No	Use of personal protective equipment Disinfection of contaminated surfaces	0	1	1	0	0	0	Isolation wards/rooms Personal Protective Equipment (e.g gloves, masks, gowns) Hand washing stations with soap and water	1	1	1	0	0
2025-07-05 08:31:06	2025-07-05 08:32:47	24	Female	Bachelor's degree	Medical laboratory scientist	Less than 5 years	Laboratory Services	Yes	Scientific journals	Not familiar at all	Fever Rash Headache Swollen lymph nodes Skin lesions	1	1	1	0	1	0	1	0	Contact with infected animals Direct contact with skin lesions of an infected person Respiratory droplets	1	1	1	0	0	0	Yes	Equally serious	Yes	Very concerned	No	Strongly agree	No		Very confident	No	Use of personal protective equipment Disinfection of contaminated surfaces	0	1	1	0	0	0	Personal Protective Equipment (e.g gloves, masks, gowns) Hand washing stations with soap and water Alcohol based hand sanitizer Disinfectants for surface cleaning Rapid response team or taskforce for outbreak management Adequate waste disposal system for medical waste Adequate electricity supply and backup generators	0	1	1	1	1
2025-07-05 08:32:47	2025-07-05 08:34:15	32	Female	Postgraduate degree	Medical laboratory scientist	Less than 5 years	Laboratory Services	Yes	TV/Radio		Fever Rash Headache Swollen lymph nodes Skin lesions	1	1	1	0	1	0	1	0	Contact with infected animals Respiratory droplets Sexual contact Touching contaminated objects or surfaces	1	0	1	1	1	0	No	Less serious	Yes	Very concerned	No	Strongly agree	No		Not confident at all	No	Isolation of infected patients Use of personal protective equipment Disinfection of contaminated surfaces Quarantine of suspected cases Vaccination	1	1	1	1	1	0	Alcohol based hand sanitizer Disinfectants for surface cleaning	0	0	0	1	1
2025-07-05 08:34:15	2025-07-05 08:35:32	34	Male	Bachelor's degree	Medical laboratory scientist	Less than 5 years	Laboratory Services	Yes	TV/Radio	Somewhat familiar	Skin lesions	0	0	0	0	0	0	1	0	Contact with infected animals	1	0	0	0	0	0	Yes	Less serious	Yes	Very concerned	Not sure	Strongly agree	No		Somewhat confident	No	Quarantine of suspected cases	0	0	0	1	0	0	Alcohol based hand sanitizer	0	0	0	1	0
2025-07-05 08:35:32	2025-07-05 08:40:31	34	Male	Bachelor's degree	Medical laboratory scientist	Less than 5 years	Laboratory Services	Yes	Others	Somewhat familiar	Fever Rash Headache Swollen lymph nodes Difficulty breathing Skin lesions	1	1	1	0	1	1	1	0	Contact with infected animals Direct contact with skin lesions of an infected person Respiratory droplets Sexual contact Touching contaminated objects or surfaces	1	1	1	1	1	0	Yes	Equally serious	Yes	Very concerned	Not sure	Strongly agree	Not sure		Not confident at all	Not sure	Isolation of infected patients Use of personal protective equipment Disinfection of contaminated surfaces Quarantine of suspected cases Vaccination	1	1	1	1	1	0	Personal Protective Equipment (e.g gloves, masks, gowns) Hand washing stations with soap and water Alcohol based hand sanitizer Disinfectants for surface cleaning Laboratory facilities for diagnostic testing Adequate waste disposal system for medical waste Ambulance services for patient transfer	0	1	1	1	1
2025-07-05 08:40:31	2025-07-05 08:42:15		Male	Bachelor's degree	Medical laboratory scientist	5-10 years	Laboratory Services	Yes	Others	Somewhat familiar	Fever Rash Headache Swollen lymph nodes Difficulty breathing Skin lesions	1	1	1	0	1	1	1	0	Contact with infected animals Direct contact with skin lesions of an infected person Respiratory droplets Sexual contact Touching contaminated objects or surfaces	1	1	1	1	1	0	No	Equally serious	Yes	Very concerned	No	Strongly agree	Not sure		Not confident at all	Not sure	Isolation of infected patients Use of personal protective equipment Disinfection of contaminated surfaces Quarantine of suspected cases Vaccination	1	1	1	1	1	0	Isolation wards/rooms Personal Protective Equipment (e.g gloves, masks, gowns) Hand washing stations with soap and water Alcohol based hand sanitizer Disinfectants for surface cleaning Adequate electricity supply and backup generators	1	1	1	1	1
2025-07-05 08:42:15	2025-07-05 08:43:56	20	Female	Bachelor's degree	Medical laboratory scientist	Less than 5 years	Laboratory Services	Yes	Others	Somewhat familiar	Fever Rash Headache Swollen lymph nodes Difficulty breathing Skin lesions	1	1	1	0	1	1	1	0	Contact with infected animals Direct contact with skin lesions of an infected person Respiratory droplets Touching contaminated objects or surfaces	1	1	1	0	1	0		Equally serious	Yes	Very concerned	No	Strongly agree	No		Not confident at all	No	Isolation of infected patients Use of personal protective equipment Disinfection of contaminated surfaces Quarantine of suspected cases Vaccination	1	1	1	1	1	0	Isolation wards/rooms Personal Protective Equipment (e.g gloves, masks, gowns) Ambulance services for patient transfer Adequate electricity supply and backup generators	1	1	0	0	0
2025-07-05 08:43:56	2025-07-05 08:47:39	24	Female	Bachelor's degree	Medical laboratory scientist	Less than 5 years	Laboratory Services	Yes	Others		Fever Rash Headache Muscle aches Swollen lymph nodes Skin lesions	1	1	1	1	1	0	1	0	Contact with infected animals Direct contact with skin lesions of an infected person Respiratory droplets Touching contaminated objects or surfaces	1	1	1	0	1	0	Yes	Equally serious	Yes	Very concerned	No	Strongly agree	No		Not confident at all	No	Isolation of infected patients Use of personal protective equipment Disinfection of contaminated surfaces Quarantine of suspected cases Vaccination	1	1	1	1	1	0	Isolation wards/rooms Personal Protective Equipment (e.g gloves, masks, gowns) Disinfectants for surface cleaning Ambulance services for patient transfer Adequate electricity supply and backup generators	1	1	0	0	1
2025-07-05 08:47:39	2025-07-05 08:49:03	28	Female	Bachelor's degree	Medical laboratory scientist	Less than 5 years	Laboratory Services	No		Not familiar at all										Contact with infected animals Direct contact with skin lesions of an infected person	1	1	0	0	0	0	Yes	Equally serious	Yes	Very concerned	No	Strongly agree	No		Not confident at all	No	Isolation of infected patients Use of personal protective equipment	1	1	0	0	0	0	Isolation wards/rooms Personal Protective Equipment (e.g gloves, masks, gowns) Hand washing stations with soap and water Disinfectants for surface cleaning	1	1	1	0	1
2025-07-05 08:49:03	2025-07-05 08:53:40	34	Male	Bachelor's degree	Medical laboratory scientist	5-10 years	Laboratory Services	Yes	TV/Radio	Very familiar	Fever Rash Headache Muscle aches Skin lesions	1	1	1	1	0	0	1	0	Direct contact with skin lesions of an infected person	0	1	0	0	0	0	Yes	Equally serious	Yes	Very concerned	No	Strongly agree	No		Somewhat confident	No	Isolation of infected patients Use of personal protective equipment Disinfection of contaminated surfaces Quarantine of suspected cases Vaccination	1	1	1	1	1	0	Hand washing stations with soap and water Alcohol based hand sanitizer Disinfectants for surface cleaning	0	0	1	1	1
2025-07-05 08:53:40	2025-07-05 08:55:18		Male	Bachelor's degree	Medical laboratory scientist	5-10 years	Laboratory Services	Yes	TV/Radio	Somewhat familiar	Fever Rash Headache Muscle aches Swollen lymph nodes Skin lesions	1	1	1	1	1	0	1	0	Direct contact with skin lesions of an infected person	0	1	0	0	0	0	Yes	Equally serious	Yes	Very concerned	Not sure	Strongly agree	No		Somewhat confident	Not sure	Isolation of infected patients Use of personal protective equipment Disinfection of contaminated surfaces Quarantine of suspected cases	1	1	1	1	0	0	Personal Protective Equipment (e.g gloves, masks, gowns) Hand washing stations with soap and water Alcohol based hand sanitizer Disinfectants for surface cleaning Laboratory facilities for diagnostic testing Rapid response team or taskforce for outbreak management Communication and reporting tools (e.g., phones, computer, internet access) Adequate waste disposal system for medical waste Ambulance…	0	1	1	1	1
2025-07-05 08:55:18	2025-07-05 08:56:53	30	Female	Bachelor's degree	Medical laboratory scientist	5-10 years	Laboratory Services	Yes	Colleagues/workplace	Very familiar	Fever Rash Headache Muscle aches Swollen lymph nodes Difficulty breathing Skin lesions	1	1	1	1	1	1	1	0	Contact with infected animals Direct contact with skin lesions of an infected person Respiratory droplets Sexual contact Touching contaminated objects or surfaces	1	1	1	1	1	0	Yes	Equally serious	Yes	Very concerned	No	Strongly agree	No		Somewhat confident	No	Isolation of infected patients Use of personal protective equipment Disinfection of contaminated surfaces Quarantine of suspected cases Vaccination	1	1	1	1	1	0	Personal Protective Equipment (e.g gloves, masks, gowns) Hand washing stations with soap and water Alcohol based hand sanitizer Disinfectants for surface cleaning	0	1	1	1	1
2025-07-05 08:56:53	2025-07-05 08:58:33		Female	Bachelor's degree	Medical laboratory scientist	Less than 5 years	Laboratory Services	Yes	TV/Radio	Somewhat familiar	Fever Rash Headache Muscle aches Swollen lymph nodes Skin lesions	1	1	1	1	1	0	1	0	Contact with infected animals Direct contact with skin lesions of an infected person Touching contaminated objects or surfaces	1	1	0	0	1	0	Yes	Equally serious	Yes	Very concerned	No	Strongly agree	No		Somewhat confident	No	Isolation of infected patients Use of personal protective equipment Disinfection of contaminated surfaces Quarantine of suspected cases Vaccination	1	1	1	1	1	0	Isolation wards/rooms Personal Protective Equipment (e.g gloves, masks, gowns) Hand washing stations with soap and water Alcohol based hand sanitizer Disinfectants for surface cleaning Laboratory facilities for diagnostic testing Ambulance services for patient transfer Adequate electricity supply and backup generators	1	1	1	1	1
2025-07-05 08:58:33	2025-07-05 09:00:13	35		Bachelor's degree	Medical laboratory scientist	5-10 years	Laboratory Services	Yes	TV/Radio	Very familiar	Fever Rash Headache Skin lesions	1	1	1	0	0	0	1	0	Contact with infected animals Touching contaminated objects or surfaces	1	0	0	0	1	0	Yes	Less serious	Yes	Very concerned	No	Agree	No		Somewhat confident	No	Isolation of infected patients Use of personal protective equipment Disinfection of contaminated surfaces Quarantine of suspected cases	1	1	1	1	0	0	Isolation wards/rooms Personal Protective Equipment (e.g gloves, masks, gowns) Hand washing stations with soap and water Alcohol based hand sanitizer Adequate waste disposal system for medical waste Ambulance services for patient transfer Adequate electricity supply and backup generators	1	1	1	1	0
2025-07-05 09:00:13	2025-07-05 09:02:01		Male	Bachelor's degree	Medical laboratory scientist	Less than 5 years	Laboratory Services	Yes	Others	Somewhat familiar	Fever Rash Swollen lymph nodes Difficulty breathing Skin lesions	1	1	0	0	1	1	1	0																									Personal Protective Equipment (e.g gloves, masks, gowns) Hand washing stations with soap and water Alcohol based hand sanitizer Disinfectants for surface cleaning Laboratory facilities for diagnostic testing	0	1	1	1	1
2025-07-05 09:02:01	2025-07-05 09:03:55	38	Female	Bachelor's degree	Medical laboratory scientist	Less than 5 years	Laboratory Services	Yes	Social media	Somewhat familiar	Fever Swollen lymph nodes	1	0	0	0	1	0	0	0	Contact with infected animals Direct contact with skin lesions of an infected person Touching contaminated objects or surfaces	1	1	0	0	1	0	Yes	Less serious	Yes	Very concerned	No	Strongly agree	Yes	None	Somewhat confident	Not sure	Isolation of infected patients Use of personal protective equipment Disinfection of contaminated surfaces	1	1	1	0	0	0	Personal Protective Equipment (e.g gloves, masks, gowns) Hand washing stations with soap and water Disinfectants for surface cleaning Laboratory facilities for diagnostic testing	0	1	1	0	1
2025-07-05 09:03:55	2025-07-05 09:05:50	35	Female	Bachelor's degree	Medical laboratory scientist	Less than 5 years	Laboratory Services	Yes	TV/Radio	Somewhat familiar	Fever Rash Headache Muscle aches Swollen lymph nodes Skin lesions	1	1	1	1	1	0	1	0	Direct contact with skin lesions of an infected person	0	1	0	0	0	0	Yes	Equally serious	Yes	Very concerned	No	Strongly agree	No		Not confident at all	No	Isolation of infected patients Disinfection of contaminated surfaces Quarantine of suspected cases Vaccination	1	0	1	1	1	0	Isolation wards/rooms Alcohol based hand sanitizer Disinfectants for surface cleaning Training programs for health workers on mpox management Adequate waste disposal system for medical waste Ambulance services for patient transfer	1	0	0	1	1
2025-07-05 09:05:50	2025-07-05 09:08:24		Female	Bachelor's degree	Medical laboratory scientist	5-10 years	Laboratory Services	Yes	TV/Radio	Somewhat familiar	Fever Rash Headache Muscle aches Skin lesions	1	1	1	1	0	0	1	0	Contact with infected animals Direct contact with skin lesions of an infected person Respiratory droplets Touching contaminated objects or surfaces	1	1	1	0	1	0	Yes	Equally serious	Yes	Very concerned	No	Strongly agree	No		Somewhat confident	Not sure	Isolation of infected patients Use of personal protective equipment Disinfection of contaminated surfaces Quarantine of suspected cases Vaccination	1	1	1	1	1	0	Personal Protective Equipment (e.g gloves, masks, gowns) Hand washing stations with soap and water Alcohol based hand sanitizer Disinfectants for surface cleaning Laboratory facilities for diagnostic testing Mpox-specific diagnostic kits Vaccine for mpox prevention Adequate waste disposal system for medical waste Adequate electricity supply and backup generators	0	1	1	1	1
2025-07-05 09:08:24	2025-07-05 09:10:08	38	Female	Bachelor's degree	Medical laboratory scientist	5-10 years	Laboratory Services	Yes	Colleagues/workplace	Very familiar	Rash Skin lesions	0	1	0	0	0	0	1	0	Contact with infected animals	1	0	0	0	0	0	Yes	Equally serious	Yes	Very concerned	No	Strongly agree	No		Somewhat confident	No	Isolation of infected patients Use of personal protective equipment Disinfection of contaminated surfaces Quarantine of suspected cases Vaccination	1	1	1	1	1	0	Personal Protective Equipment (e.g gloves, masks, gowns) Hand washing stations with soap and water Alcohol based hand sanitizer	0	1	1	1	0
2025-07-05 09:10:08	2025-07-05 09:11:38	32	Female	Bachelor's degree	Medical laboratory scientist	5-10 years	Laboratory Services	Yes	Colleagues/workplace	Very familiar	Rash Swollen lymph nodes Skin lesions	0	1	0	0	1	0	1	0	Contact with infected animals	1	0	0	0	0	0	Yes	Equally serious	Yes	Very concerned	No	Strongly agree	No		Somewhat confident	No	Isolation of infected patients Use of personal protective equipment Disinfection of contaminated surfaces Quarantine of suspected cases Vaccination	1	1	1	1	1	0	Personal Protective Equipment (e.g gloves, masks, gowns) Hand washing stations with soap and water Alcohol based hand sanitizer Disinfectants for surface cleaning Communication and reporting tools (e.g., phones, computer, internet access)	0	1	1	1	1
2025-07-05 09:11:38	2025-07-05 09:13:24	34	Male	Bachelor's degree	Medical laboratory scientist	Less than 5 years	Laboratory Services	Yes	Scientific journals		Fever Rash Headache Muscle aches Swollen lymph nodes Skin lesions	1	1	1	1	1	0	1	0	Contact with infected animals Direct contact with skin lesions of an infected person Touching contaminated objects or surfaces	1	1	0	0	1	0	Yes	Less serious	Yes	Very concerned	Not sure	Strongly agree	Not sure		Somewhat confident	Not sure	Isolation of infected patients Use of personal protective equipment Disinfection of contaminated surfaces	1	1	1	0	0	0	Personal Protective Equipment (e.g gloves, masks, gowns) Hand washing stations with soap and water Alcohol based hand sanitizer Disinfectants for surface cleaning Laboratory facilities for diagnostic testing Stock of antiviral medications for mpox treatment Communication and reporting tools (e.g., phones, computer, internet access)	0	1	1	1	1
2025-07-05 09:13:24	2025-07-05 09:15:02		Female	Bachelor's degree	Medical laboratory scientist	5-10 years	Laboratory Services	Yes	TV/Radio	Very familiar	Fever Rash Headache Muscle aches Swollen lymph nodes Difficulty breathing Skin lesions	1	1	1	1	1	1	1	0	Contact with infected animals Direct contact with skin lesions of an infected person Respiratory droplets Sexual contact Touching contaminated objects or surfaces	1	1	1	1	1	0	Yes	Equally serious	Yes	Very concerned	No	Strongly agree	Not sure		Not confident at all	Not sure	Isolation of infected patients Use of personal protective equipment Disinfection of contaminated surfaces Quarantine of suspected cases Vaccination	1	1	1	1	1	0	Isolation wards/rooms Personal Protective Equipment (e.g gloves, masks, gowns) Hand washing stations with soap and water Alcohol based hand sanitizer Disinfectants for surface cleaning Adequate electricity supply and backup generators	1	1	1	1	1
2025-07-05 09:15:02	2025-07-05 09:17:12	25	Female	Bachelor's degree	Medical laboratory scientist	Less than 5 years	Laboratory Services	Yes	Social media	Somewhat familiar	Fever Rash Headache Skin lesions	1	1	1	0	0	0	1	0	Contact with infected animals Direct contact with skin lesions of an infected person Touching contaminated objects or surfaces	1	1	0	0	1	0	Yes	Equally serious	Yes	Moderately concerned	No	Strongly agree	Not sure		Not confident at all	Not sure	Isolation of infected patients Use of personal protective equipment Disinfection of contaminated surfaces Quarantine of suspected cases Vaccination	1	1	1	1	1	0	Isolation wards/rooms Personal Protective Equipment (e.g gloves, masks, gowns) Hand washing stations with soap and water Alcohol based hand sanitizer Disinfectants for surface cleaning Communication and reporting tools (e.g., phones, computer, internet access) Adequate waste disposal system for medical waste	1	1	1	1	1
2025-07-05 09:17:12	2025-07-05 09:18:50	23	Female	Bachelor's degree	Doctor	Less than 5 years	Others	Yes	Social media	Somewhat familiar	Fever Rash Muscle aches Swollen lymph nodes Skin lesions	1	1	0	1	1	0	1	0	Direct contact with skin lesions of an infected person I don't know	0	1	0	0	0	1	Yes	Equally serious	Yes	Very concerned	No	Strongly agree	No		Not confident at all	No	Isolation of infected patients Use of personal protective equipment Disinfection of contaminated surfaces	1	1	1	0	0	0	Personal Protective Equipment (e.g gloves, masks, gowns) Hand washing stations with soap and water Disinfectants for surface cleaning	0	1	1	0	1
2025-07-05 09:18:50	2025-07-05 09:20:22	32	Male	Bachelor's degree	Medical laboratory scientist	5-10 years	Laboratory Services	Yes	Social media	Very familiar	Rash	0	1	0	0	0	0	0	0	Direct contact with skin lesions of an infected person	0	1	0	0	0	0	Yes	Less serious	Yes	Moderately concerned	No	Strongly agree	No		Very confident	No	Vaccination	0	0	0	0	1	0	Personal Protective Equipment (e.g gloves, masks, gowns)	0	1	0	0	0
2025-07-05 09:20:22	2025-07-05 09:21:59	28	Female	Bachelor's degree	Pharmacist	Less than 5 years	Others	Yes	Others	Not familiar at all	Fever Rash Headache Swollen lymph nodes Skin lesions	1	1	1	0	1	0	1	0	Contact with infected animals Direct contact with skin lesions of an infected person Respiratory droplets	1	1	1	0	0	0	Yes	Equally serious	Yes	Very concerned	No	Strongly agree	No		Somewhat confident	No	Isolation of infected patients Use of personal protective equipment Disinfection of contaminated surfaces Vaccination	1	1	1	0	1	0	Isolation wards/rooms Personal Protective Equipment (e.g gloves, masks, gowns) Hand washing stations with soap and water Alcohol based hand sanitizer Disinfectants for surface cleaning	1	1	1	1	1
2025-07-05 09:21:59	2025-07-05 09:23:38	25	Female	Bachelor's degree	Pharmacist	Less than 5 years	Others	Yes	Social media	Somewhat familiar										Contact with infected animals Direct contact with skin lesions of an infected person Touching contaminated objects or surfaces	1	1	0	0	1	0	Yes	Equally serious	Yes	Very concerned	Yes	Strongly agree	Not sure		Not confident at all	Not sure	Isolation of infected patients Use of personal protective equipment Disinfection of contaminated surfaces Quarantine of suspected cases Vaccination	1	1	1	1	1	0	Isolation wards/rooms Personal Protective Equipment (e.g gloves, masks, gowns) Hand washing stations with soap and water Alcohol based hand sanitizer Disinfectants for surface cleaning Laboratory facilities for diagnostic testing Communication and reporting tools (e.g., phones, computer, internet access) Adequate waste disposal system for medical waste Ambulance services for patient transfer	1	1	1	1	1
2025-07-05 09:23:38	2025-07-05 09:29:34	28	Male	Bachelor's degree	Pharmacist	Less than 5 years	Others	Yes	Colleagues/workplace	Very familiar	Fever Rash Swollen lymph nodes Difficulty breathing	1	1	0	0	1	1	0	0	Contact with infected animals Direct contact with skin lesions of an infected person Respiratory droplets Touching contaminated objects or surfaces	1	1	1	0	1	0	Yes	Equally serious	Yes	Very concerned	Yes	Strongly agree	Yes	None	Somewhat confident	Not sure	Isolation of infected patients Use of personal protective equipment Disinfection of contaminated surfaces Quarantine of suspected cases Vaccination	1	1	1	1	1	0	Isolation wards/rooms Personal Protective Equipment (e.g gloves, masks, gowns) Hand washing stations with soap and water	1	1	1	0	0
2025-07-05 09:29:34	2025-07-05 09:31:17	26	Female	Bachelor's degree	Pharmacist	Less than 5 years	Others	Yes	Social media		Fever Headache Muscle aches Swollen lymph nodes	1	0	1	1	1	0	0	0	Direct contact with skin lesions of an infected person Respiratory droplets Touching contaminated objects or surfaces	0	1	1	0	1	0	Yes	Less serious	Yes	Moderately concerned	No	Strongly agree	No		Not confident at all	Not sure	I am not familiar with any preventive measures	0	0	0	0	0	1	Hand washing stations with soap and water Disinfectants for surface cleaning Rapid response team or taskforce for outbreak management Communication and reporting tools (e.g., phones, computer, internet access) Adequate waste disposal system for medical waste Ambulance services for patient transfer Adequate electricity supply and backup generators	0	0	1	0	1
2025-07-05 09:31:17	2025-07-05 09:32:45	26	Female	Bachelor's degree	Pharmacist	Less than 5 years	Others	Yes	TV/Radio	Somewhat familiar	Fever Rash Swollen lymph nodes	1	1	0	0	1	0	0	0	Contact with infected animals Direct contact with skin lesions of an infected person	1	1	0	0	0	0	Yes	Equally serious	Yes	Moderately concerned	Not sure	Agree	No		Not confident at all	Not sure	Isolation of infected patients Use of personal protective equipment Disinfection of contaminated surfaces Quarantine of suspected cases	1	1	1	1	0	0	Isolation wards/rooms Personal Protective Equipment (e.g gloves, masks, gowns) Hand washing stations with soap and water Alcohol based hand sanitizer Disinfectants for surface cleaning Laboratory facilities for diagnostic testing Adequate waste disposal system for medical waste Ambulance services for patient transfer Adequate electricity supply and backup generators	1	1	1	1	1
2025-07-05 09:32:45	2025-07-05 09:34:16		Male	Bachelor's degree	Pharmacist	Less than 5 years	Others	Yes	Social media	Somewhat familiar	Rash Swollen lymph nodes	0	1	0	0	1	0	0	0	Contact with infected animals Direct contact with skin lesions of an infected person Touching contaminated objects or surfaces	1	1	0	0	1	0	No	Equally serious	Yes	Moderately concerned	No	Agree	No		Somewhat confident	No	Isolation of infected patients Use of personal protective equipment Disinfection of contaminated surfaces Quarantine of suspected cases Vaccination	1	1	1	1	1	0	Isolation wards/rooms Personal Protective Equipment (e.g gloves, masks, gowns) Hand washing stations with soap and water	1	1	1	0	0
2025-07-05 09:34:16	2025-07-05 09:36:00	25	Female	Bachelor's degree	Pharmacist	Less than 5 years	Others	Yes	Colleagues/workplace	Somewhat familiar	Fever Rash Headache Muscle aches Swollen lymph nodes Difficulty breathing	1	1	1	1	1	1	0	0	Contact with infected animals Respiratory droplets Touching contaminated objects or surfaces	1	0	1	0	1	0	Yes	More serious	Yes	Very concerned	Not sure	Strongly agree	No		Somewhat confident	Not sure	Use of personal protective equipment Disinfection of contaminated surfaces Vaccination	0	1	1	0	1	0	Isolation wards/rooms Personal Protective Equipment (e.g gloves, masks, gowns) Hand washing stations with soap and water Laboratory facilities for diagnostic testing	1	1	1	0	0
2025-07-05 09:36:00	2025-07-05 09:37:45	29	Male	Bachelor's degree	Pharmacist	Less than 5 years	Pediatrics	Yes	Social media	Not familiar at all	Fever Rash Headache Difficulty breathing	1	1	1	0	0	1	0	0	Direct contact with skin lesions of an infected person	0	1	0	0	0	0	Not sure	Less serious	Yes	Very concerned	No	Strongly agree	No			No	Isolation of infected patients Use of personal protective equipment Quarantine of suspected cases	1	1	0	1	0	0
2025-07-05 09:37:46	2025-07-05 09:39:37		Male	Bachelor's degree	Pharmacist	Less than 5 years	Others	Yes	Others	Somewhat familiar	Fever Rash Headache Muscle aches Swollen lymph nodes	1	1	1	1	1	0	0	0	Contact with infected animals Direct contact with skin lesions of an infected person Touching contaminated objects or surfaces	1	1	0	0	1	0	Yes	Equally serious	Yes	Moderately concerned	No	Strongly agree	No		Not confident at all	Not sure	Isolation of infected patients Use of personal protective equipment Disinfection of contaminated surfaces Quarantine of suspected cases Vaccination	1	1	1	1	1	0	Isolation wards/rooms Hand washing stations with soap and water Disinfectants for surface cleaning Laboratory facilities for diagnostic testing Adequate waste disposal system for medical waste Ambulance services for patient transfer	1	0	1	0	1
2025-07-05 09:39:37	2025-07-05 09:41:21	36	Female	Bachelor's degree	Nurses	Less than 5 years	Emergency Care	Yes	Colleagues/workplace	Very familiar	Fever Rash Headache Muscle aches Swollen lymph nodes Skin lesions	1	1	1	1	1	0	1	0	Direct contact with skin lesions of an infected person	0	1	0	0	0	0	Yes	Equally serious	Yes	Very concerned	Not sure	Strongly agree	Not sure		Very confident	Not sure	Isolation of infected patients Use of personal protective equipment Disinfection of contaminated surfaces Quarantine of suspected cases Vaccination	1	1	1	1	1	0	Isolation wards/rooms Personal Protective Equipment (e.g gloves, masks, gowns) Hand washing stations with soap and water Alcohol based hand sanitizer Disinfectants for surface cleaning Laboratory facilities for diagnostic testing Rapid response team or taskforce for outbreak management	1	1	1	1	1
2025-07-05 09:41:21	2025-07-05 09:43:25	37	Female	Bachelor's degree	Nurses	11-15 years	Others	Yes	Colleagues/workplace	Somewhat familiar	Fever Rash Muscle aches Swollen lymph nodes Skin lesions	1	1	0	1	1	0	1	0	Contact with infected animals Direct contact with skin lesions of an infected person Sexual contact Touching contaminated objects or surfaces	1	1	0	1	1	0	Yes	Equally serious	Yes	Very concerned	No	Strongly agree	Not sure		Somewhat confident	Not sure	Isolation of infected patients Use of personal protective equipment Disinfection of contaminated surfaces Quarantine of suspected cases	1	1	1	1	0	0	Isolation wards/rooms Personal Protective Equipment (e.g gloves, masks, gowns) Hand washing stations with soap and water Alcohol based hand sanitizer Disinfectants for surface cleaning Laboratory facilities for diagnostic testing Adequate waste disposal system for medical waste Ambulance services for patient transfer Adequate electricity supply and backup generators Cold chain storage for vaccine…	1	1	1	1	1
2025-07-05 09:43:25	2025-07-05 09:45:16	35	Male	Postgraduate degree	Pharmacist	11-15 years	Others	Yes	Social media	Not familiar at all	Fever Rash Skin lesions	1	1	0	0	0	0	1	0	Sexual contact	0	0	0	1	0	0	Yes	Less serious	Not sure	Moderately concerned	No	Agree	No		Not confident at all	No	Isolation of infected patients Use of personal protective equipment Quarantine of suspected cases Vaccination	1	1	0	1	1	0
2025-07-05 09:45:16	2025-07-05 09:47:18	38	Male	Postgraduate degree	Pharmacist	More than 15 years	Others	Yes	Colleagues/workplace	Very familiar	Fever Rash Headache Muscle aches Swollen lymph nodes Difficulty breathing Skin lesions	1	1	1	1	1	1	1	0	Contact with infected animals Direct contact with skin lesions of an infected person Respiratory droplets Sexual contact Touching contaminated objects or surfaces	1	1	1	1	1	0	Yes	Equally serious	Yes	Very concerned					Very confident	Yes	Isolation of infected patients Use of personal protective equipment Disinfection of contaminated surfaces Quarantine of suspected cases Vaccination	1	1	1	1	1	0	Isolation wards/rooms Personal Protective Equipment (e.g gloves, masks, gowns) Hand washing stations with soap and water Alcohol based hand sanitizer Disinfectants for surface cleaning Laboratory facilities for diagnostic testing Stock of antiviral medications for mpox treatment Adequate waste disposal system for medical waste Ambulance services for patient transfer Adequate electricity supply an…	1	1	1	1	1
2025-07-05 09:47:18	2025-07-05 09:49:12	40	Male	Bachelor's degree	Pharmacist	11-15 years	Others	Yes	TV/Radio	Very familiar	Fever Rash Headache Muscle aches Swollen lymph nodes Difficulty breathing Skin lesions	1	1	1	1	1	1	1	0	Contact with infected animals Direct contact with skin lesions of an infected person Respiratory droplets Sexual contact Touching contaminated objects or surfaces	1	1	1	1	1	0	Yes	Less serious	Yes	Very concerned	Yes	Agree	No		Very confident	Yes	Isolation of infected patients Use of personal protective equipment Disinfection of contaminated surfaces Quarantine of suspected cases	1	1	1	1	0	0	Isolation wards/rooms Personal Protective Equipment (e.g gloves, masks, gowns) Hand washing stations with soap and water Alcohol based hand sanitizer Disinfectants for surface cleaning Laboratory facilities for diagnostic testing Standard treatment guidelines or protocol for mpox Adequate waste disposal system for medical waste Ambulance services for patient transfer Adequate electricity supply a…	1	1	1	1	1
2025-07-05 09:49:12	2025-07-05 09:50:46	54	Female	Diploma/Certificate	Nurses	More than 15 years	Infectious Diseases	No		Very familiar	Fever	1	0	0	0	0	0	0	0	Contact with infected animals	1	0	0	0	0	0	Yes	Equally serious	Yes	Very concerned	No	Strongly agree	No		Not confident at all	No	Quarantine of suspected cases	0	0	0	1	0	0	Hand washing stations with soap and water Training programs for health workers on mpox management	0	0	1	0	0
2025-07-05 09:50:46	2025-07-05 09:52:47	40	Male	Bachelor's degree	Doctor	11-15 years	Others	Yes	TV/Radio	Somewhat familiar	Rash	0	1	0	0	0	0	0	0	Contact with infected animals Direct contact with skin lesions of an infected person	1	1	0	0	0	0	Yes	Equally serious	Yes	Very concerned	Yes	Strongly agree	Not sure		Somewhat confident	Not sure	Isolation of infected patients Use of personal protective equipment Disinfection of contaminated surfaces Quarantine of suspected cases Vaccination	1	1	1	1	1	0	Personal Protective Equipment (e.g gloves, masks, gowns) Hand washing stations with soap and water Alcohol based hand sanitizer Disinfectants for surface cleaning Communication and reporting tools (e.g., phones, computer, internet access) Adequate waste disposal system for medical waste Ambulance services for patient transfer Adequate electricity supply and backup generators Cold chain storage fo…	0	1	1	1	1
2025-07-05 09:52:48	2025-07-05 09:54:20	30	Male		Doctor	5-10 years	Others	Yes	Others	Somewhat familiar	Skin lesions	0	0	0	0	0	0	1	0	Respiratory droplets	0	0	1	0	0	0	Yes	Equally serious	Yes	Very concerned	No	Strongly agree	No		Very confident	Not sure	Quarantine of suspected cases	0	0	0	1	0	0	Hand washing stations with soap and water	0	0	1	0	0
2025-07-05 09:54:20	2025-07-05 09:56:09	24	Female	Diploma/Certificate	Nurses	Less than 5 years	Others	Yes	Social media	Very familiar	Skin lesions	0	0	0	0	0	0	1	0	Direct contact with skin lesions of an infected person	0	1	0	0	0	0	Not sure	Less serious	Yes	Moderately concerned	No	Strongly agree	No		Not confident at all	No	Vaccination	0	0	0	0	1	0	Personal Protective Equipment (e.g gloves, masks, gowns) Hand washing stations with soap and water Alcohol based hand sanitizer Adequate waste disposal system for medical waste Cold chain storage for vaccines or laboratory specimens	0	1	1	1	0
2025-07-05 09:56:09	2025-07-05 09:58:57	28	Female	Diploma/Certificate	Nurses	5-10 years	Others	Yes	Colleagues/workplace	Somewhat familiar	Fever Rash Muscle aches Skin lesions	1	1	0	1	0	0	1	0	Contact with infected animals Direct contact with skin lesions of an infected person Respiratory droplets Touching contaminated objects or surfaces	1	1	1	0	1	0	Yes	Equally serious	Yes	Very concerned	No	Strongly agree	No		Somewhat confident	No	Isolation of infected patients Use of personal protective equipment Disinfection of contaminated surfaces Quarantine of suspected cases	1	1	1	1	0	0	Isolation wards/rooms Personal Protective Equipment (e.g gloves, masks, gowns) Hand washing stations with soap and water Alcohol based hand sanitizer Disinfectants for surface cleaning Laboratory facilities for diagnostic testing Mpox-specific diagnostic kits Communication and reporting tools (e.g., phones, computer, internet access) Ambulance services for patient transfer Adequate electricity su…	1	1	1	1	1
2025-07-05 09:58:58	2025-07-05 10:00:33		Female	Bachelor's degree	Others	Less than 5 years	Others	Yes	TV/Radio	Not familiar at all	Rash	0	1	0	0	0	0	0	0	Direct contact with skin lesions of an infected person	0	1	0	0	0	0	Yes	Equally serious	Yes	Very concerned	No	Agree	Not sure		Not confident at all	Not sure	Isolation of infected patients	1	0	0	0	0	0	Personal Protective Equipment (e.g gloves, masks, gowns) Alcohol based hand sanitizer Laboratory facilities for diagnostic testing Vaccine for mpox prevention Standard treatment guidelines or protocol for mpox Ambulance services for patient transfer	0	1	0	1	0
2025-07-05 10:00:33	2025-07-05 10:02:36	25	Male	Diploma/Certificate	Nurses	Less than 5 years	Others	Yes	TV/Radio	Somewhat familiar	Fever	1	0	0	0	0	0	0	0	Sexual contact	0	0	0	1	0	0	Yes	Equally serious	Yes	Very concerned	Not sure	Strongly disagree	No		Very confident	Yes	Isolation of infected patients	1	0	0	0	0	0	Personal Protective Equipment (e.g gloves, masks, gowns) Hand washing stations with soap and water Disinfectants for surface cleaning Laboratory facilities for diagnostic testing Ambulance services for patient transfer Adequate electricity supply and backup generators Cold chain storage for vaccines or laboratory specimens	0	1	1	0	1
2025-07-05 10:02:36	2025-07-05 10:04:15	27	Female	Bachelor's degree	Pharmacist	Less than 5 years	Others	Yes	Social media		Fever Rash Headache Muscle aches Swollen lymph nodes Difficulty breathing	1	1	1	1	1	1	0	0	Contact with infected animals Direct contact with skin lesions of an infected person Respiratory droplets Sexual contact Touching contaminated objects or surfaces	1	1	1	1	1	0	Yes	More serious	Yes	Very concerned	No	Strongly agree	No		Somewhat confident	Not sure	Isolation of infected patients Use of personal protective equipment Disinfection of contaminated surfaces Quarantine of suspected cases	1	1	1	1	0	0	Isolation wards/rooms Personal Protective Equipment (e.g gloves, masks, gowns) Alcohol based hand sanitizer Disinfectants for surface cleaning Adequate waste disposal system for medical waste Ambulance services for patient transfer Adequate electricity supply and backup generators	1	1	0	1	1
2025-07-05 10:04:15	2025-07-05 10:06:13	29	Male	Bachelor's degree	Pharmacist	Less than 5 years	Others	Yes	Social media	Somewhat familiar	Fever Rash Headache Swollen lymph nodes	1	1	1	0	1	0	0	0	Contact with infected animals Direct contact with skin lesions of an infected person Respiratory droplets Touching contaminated objects or surfaces	1	1	1	0	1	0	Yes	More serious	Yes	Not concerned at all	Not sure	Agree	No		Somewhat confident	No	Isolation of infected patients Use of personal protective equipment Disinfection of contaminated surfaces Quarantine of suspected cases Vaccination	1	1	1	1	1	0	Isolation wards/rooms Personal Protective Equipment (e.g gloves, masks, gowns) Hand washing stations with soap and water Laboratory facilities for diagnostic testing Ambulance services for patient transfer Adequate electricity supply and backup generators	1	1	1	0	0
2025-07-05 10:06:13	2025-07-05 10:07:49		Female	Bachelor's degree	Public Health Officer	Less than 5 years	Others	Yes	TV/Radio	Not familiar at all	Rash	0	1	0	0	0	0	0	0	Direct contact with skin lesions of an infected person	0	1	0	0	0	0	Yes	More serious	Yes	Not concerned at all	Yes	Strongly agree	Not sure		Somewhat confident	Not sure	Vaccination	0	0	0	0	1	0	Laboratory facilities for diagnostic testing	0	0	0	0	0
2025-07-05 10:07:49	2025-07-05 10:09:44	23	Female	Bachelor's degree	Pharmacist	Less than 5 years	Others	Yes	Social media	Very familiar	Fever Rash Headache Muscle aches Swollen lymph nodes	1	1	1	1	1	0	0	0	Contact with infected animals	1	0	0	0	0	0	Yes	Equally serious	Yes	Very concerned	No	Strongly agree	Not sure		Somewhat confident	No	Isolation of infected patients Use of personal protective equipment Disinfection of contaminated surfaces Quarantine of suspected cases Vaccination	1	1	1	1	1	0	Personal Protective Equipment (e.g gloves, masks, gowns) Hand washing stations with soap and water Alcohol based hand sanitizer Disinfectants for surface cleaning Laboratory facilities for diagnostic testing Stock of antiviral medications for mpox treatment Rapid response team or taskforce for outbreak management Communication and reporting tools (e.g., phones, computer, internet access) Adequate…	0	1	1	1	1
2025-07-05 10:09:44	2025-07-05 22:26:32	40	Male	Bachelor's degree	Pharmacist	Less than 5 years	Others	Yes	TV/Radio	Somewhat familiar	Fever Rash Headache Skin lesions	1	1	1	0	0	0	1	0	Contact with infected animals Direct contact with skin lesions of an infected person	1	1	0	0	0	0	Yes	Equally serious	Yes	Very concerned	Yes	Strongly agree	No		Somewhat confident	No	Isolation of infected patients Use of personal protective equipment Disinfection of contaminated surfaces Quarantine of suspected cases Vaccination	1	1	1	1	1	0	Personal Protective Equipment (e.g gloves, masks, gowns) Hand washing stations with soap and water Alcohol based hand sanitizer Disinfectants for surface cleaning Laboratory facilities for diagnostic testing Communication and reporting tools (e.g., phones, computer, internet access) Adequate waste disposal system for medical waste Ambulance services for patient transfer Adequate electricity suppl…	0	1	1	1	1
2025-07-05 22:26:32	2025-07-05 22:28:20	24	Male	Bachelor's degree	Doctor	Less than 5 years	Others	Yes	Colleagues/workplace	Very familiar	Fever Rash Headache Muscle aches Swollen lymph nodes Skin lesions	1	1	1	1	1	0	1	0	Contact with infected animals Direct contact with skin lesions of an infected person Respiratory droplets	1	1	1	0	0	0	Yes	More serious	Yes	Very concerned	Yes	Strongly agree	No		Not confident at all	Not sure	Isolation of infected patients Use of personal protective equipment Disinfection of contaminated surfaces Quarantine of suspected cases	1	1	1	1	0	0	Isolation wards/rooms Personal Protective Equipment (e.g gloves, masks, gowns) Hand washing stations with soap and water Alcohol based hand sanitizer Mpox-specific diagnostic kits Rapid response team or taskforce for outbreak management Standard treatment guidelines or protocol for mpox Cold chain storage for vaccines or laboratory specimens Emergency funds or budget allocation for outbreak respo…	1	1	1	1	0
2025-07-05 22:28:20	2025-07-05 22:30:32	34	Male	Bachelor's degree	Doctor	5-10 years	Pediatrics	Yes	Colleagues/workplace	Somewhat familiar	Fever Rash Muscle aches Swollen lymph nodes Difficulty breathing Skin lesions	1	1	0	1	1	1	1	0	Contact with infected animals Direct contact with skin lesions of an infected person Respiratory droplets Sexual contact Touching contaminated objects or surfaces	1	1	1	1	1	0	Yes	Equally serious	Yes	Very concerned	No	Strongly agree	No		Not confident at all	No	Isolation of infected patients Use of personal protective equipment Disinfection of contaminated surfaces Quarantine of suspected cases Vaccination	1	1	1	1	1	0	Hand washing stations with soap and water Alcohol based hand sanitizer Disinfectants for surface cleaning Communication and reporting tools (e.g., phones, computer, internet access) Adequate waste disposal system for medical waste Ambulance services for patient transfer Adequate electricity supply and backup generators	0	0	1	1	1
2025-07-05 22:30:32	2025-07-05 22:32:12	30	Female	Bachelor's degree	Doctor	Less than 5 years	Pediatrics	Yes	Scientific journals	Very familiar	Fever Rash Headache Muscle aches Swollen lymph nodes Difficulty breathing Skin lesions	1	1	1	1	1	1	1	0	Contact with infected animals Direct contact with skin lesions of an infected person Respiratory droplets	1	1	1	0	0	0	Yes	Equally serious	Yes	Very concerned	No	Strongly agree	Yes		Somewhat confident	No	Isolation of infected patients Use of personal protective equipment Disinfection of contaminated surfaces Quarantine of suspected cases Vaccination	1	1	1	1	1	0	Hand washing stations with soap and water Alcohol based hand sanitizer Disinfectants for surface cleaning Adequate waste disposal system for medical waste Ambulance services for patient transfer Adequate electricity supply and backup generators	0	0	1	1	1
2025-07-05 22:32:12	2025-07-05 22:34:05		Female	Bachelor's degree	Medical laboratory scientist	Less than 5 years	Laboratory Services	Yes	TV/Radio	Somewhat familiar	Fever Rash Headache Muscle aches Swollen lymph nodes Difficulty breathing Skin lesions	1	1	1	1	1	1	1	0	Contact with infected animals Direct contact with skin lesions of an infected person Respiratory droplets	1	1	1	0	0	0	Yes	Equally serious	Yes	Very concerned	No	Strongly agree	No		Not confident at all	No	Isolation of infected patients Use of personal protective equipment Disinfection of contaminated surfaces Quarantine of suspected cases	1	1	1	1	0	0	Personal Protective Equipment (e.g gloves, masks, gowns) Hand washing stations with soap and water Disinfectants for surface cleaning Adequate waste disposal system for medical waste Ambulance services for patient transfer Adequate electricity supply and backup generators	0	1	1	0	1
2025-07-05 22:34:05	2025-07-05 22:35:37	27	Male	Bachelor's degree	Medical laboratory scientist	Less than 5 years	Laboratory Services	Yes	TV/Radio	Somewhat familiar	Fever Rash Skin lesions	1	1	0	0	0	0	1	0	Contact with infected animals Direct contact with skin lesions of an infected person Respiratory droplets Touching contaminated objects or surfaces	1	1	1	0	1	0	Yes	Equally serious	Yes	Very concerned	No	Strongly agree	No		Not confident at all	Not sure	Isolation of infected patients Use of personal protective equipment Disinfection of contaminated surfaces Quarantine of suspected cases Vaccination	1	1	1	1	1	0	Isolation wards/rooms Personal Protective Equipment (e.g gloves, masks, gowns) Hand washing stations with soap and water Adequate waste disposal system for medical waste Ambulance services for patient transfer Adequate electricity supply and backup generators	1	1	1	0	0
2025-07-05 22:35:37	2025-07-05 22:37:12		Male	Bachelor's degree	Medical laboratory scientist	5-10 years	Laboratory Services	Yes	TV/Radio	Somewhat familiar	Fever Rash Headache Muscle aches Skin lesions	1	1	1	1	0	0	1	0	Contact with infected animals Direct contact with skin lesions of an infected person Respiratory droplets Touching contaminated objects or surfaces	1	1	1	0	1	0	Yes	More serious	Yes	Very concerned	Yes	Strongly agree	No		Not confident at all	No	Isolation of infected patients Use of personal protective equipment Disinfection of contaminated surfaces	1	1	1	0	0	0	Personal Protective Equipment (e.g gloves, masks, gowns) Hand washing stations with soap and water Alcohol based hand sanitizer Disinfectants for surface cleaning Laboratory facilities for diagnostic testing Ambulance services for patient transfer Adequate electricity supply and backup generators	0	1	1	1	1
2025-07-05 22:37:12	2025-07-05 22:39:09	42	Male	Bachelor's degree	Others	11-15 years	Others	Yes	TV/Radio	Very familiar	Fever Rash Headache Muscle aches Swollen lymph nodes Skin lesions	1	1	1	1	1	0	1	0	Contact with infected animals Direct contact with skin lesions of an infected person Respiratory droplets Sexual contact Touching contaminated objects or surfaces	1	1	1	1	1	0	Yes	Less serious	Yes	Very concerned	No	Strongly agree	No		Somewhat confident	Not sure	Isolation of infected patients Use of personal protective equipment Disinfection of contaminated surfaces Quarantine of suspected cases Vaccination	1	1	1	1	1	0	Personal Protective Equipment (e.g gloves, masks, gowns) Hand washing stations with soap and water Alcohol based hand sanitizer Disinfectants for surface cleaning Laboratory facilities for diagnostic testing Adequate waste disposal system for medical waste Ambulance services for patient transfer Adequate electricity supply and backup generators	0	1	1	1	1
2025-07-05 22:39:09	2025-07-05 22:40:42	26	Female	Diploma/Certificate	Public Health Officer	Less than 5 years	Others	Yes	Social media	Somewhat familiar	Fever Rash Headache Muscle aches Skin lesions	1	1	1	1	0	0	1	0	Contact with infected animals Direct contact with skin lesions of an infected person	1	1	0	0	0	0	Yes	Equally serious	Yes	Very concerned	No	Strongly agree	No		Somewhat confident	No	Isolation of infected patients Use of personal protective equipment Quarantine of suspected cases Vaccination	1	1	0	1	1	0	Personal Protective Equipment (e.g gloves, masks, gowns) Hand washing stations with soap and water Adequate waste disposal system for medical waste Ambulance services for patient transfer Adequate electricity supply and backup generators	0	1	1	0	0
2025-07-05 22:40:42	2025-07-05 22:42:09	40	Female	Bachelor's degree	Others	5-10 years	Others	Yes	TV/Radio	Somewhat familiar	Fever Rash Headache Muscle aches Swollen lymph nodes Skin lesions	1	1	1	1	1	0	1	0	Direct contact with skin lesions of an infected person	0	1	0	0	0	0	Yes	Equally serious	Yes	Very concerned	No	Strongly agree	No		Not confident at all	Not sure	Isolation of infected patients Use of personal protective equipment Disinfection of contaminated surfaces Quarantine of suspected cases Vaccination	1	1	1	1	1	0	Isolation wards/rooms Personal Protective Equipment (e.g gloves, masks, gowns) Hand washing stations with soap and water Alcohol based hand sanitizer Disinfectants for surface cleaning Laboratory facilities for diagnostic testing	1	1	1	1	1
2025-07-05 22:42:09	2025-07-05 22:43:41	28	Male	Bachelor's degree	Others	Less than 5 years	Others	Yes	Social media	Somewhat familiar	Rash	0	1	0	0	0	0	0	0	Respiratory droplets	0	0	1	0	0	0	Yes	Equally serious	Yes	Very concerned	Not sure	Strongly agree	No		Somewhat confident	Yes	Isolation of infected patients	1	0	0	0	0	0	Isolation wards/rooms	1	0	0	0	0
2025-07-05 22:43:41	2025-07-05 22:45:30	31	Female	Bachelor's degree	Public Health Officer	Less than 5 years	Others	Yes	TV/Radio	Somewhat familiar	Fever Rash Headache Muscle aches Skin lesions	1	1	1	1	0	0	1	0	Contact with infected animals Direct contact with skin lesions of an infected person Touching contaminated objects or surfaces	1	1	0	0	1	0	Yes	Equally serious	Yes	Very concerned	No	Strongly agree	Not sure		Somewhat confident	No	Isolation of infected patients Use of personal protective equipment Quarantine of suspected cases Vaccination	1	1	0	1	1	0	Personal Protective Equipment (e.g gloves, masks, gowns) Hand washing stations with soap and water Alcohol based hand sanitizer Adequate waste disposal system for medical waste Ambulance services for patient transfer Adequate electricity supply and backup generators	0	1	1	1	0
2025-07-05 22:45:30	2025-07-05 22:47:21	31	Male	Bachelor's degree	Public Health Officer	5-10 years	Others	Yes	TV/Radio	Somewhat familiar	Fever Rash Headache Muscle aches Difficulty breathing Skin lesions	1	1	1	1	0	1	1	0	Contact with infected animals Direct contact with skin lesions of an infected person Respiratory droplets Touching contaminated objects or surfaces	1	1	1	0	1	0	Yes	Equally serious	No	Not concerned at all	No	Strongly agree	No		Not confident at all	Not sure	Isolation of infected patients Use of personal protective equipment Disinfection of contaminated surfaces	1	1	1	0	0	0	Personal Protective Equipment (e.g gloves, masks, gowns) Hand washing stations with soap and water Alcohol based hand sanitizer Disinfectants for surface cleaning Communication and reporting tools (e.g., phones, computer, internet access) Adequate waste disposal system for medical waste Adequate electricity supply and backup generators	0	1	1	1	1
2025-07-05 22:47:21	2025-07-05 22:48:49	24	Female	Bachelor's degree	Doctor	Less than 5 years	Pediatrics	Yes	Social media	Very familiar	Fever Rash Headache Muscle aches Swollen lymph nodes Skin lesions	1	1	1	1	1	0	1	0	Contact with infected animals Direct contact with skin lesions of an infected person Respiratory droplets	1	1	1	0	0	0	Yes	Equally serious	Yes	Very concerned	No	Strongly agree	No		Somewhat confident	Not sure	Isolation of infected patients Use of personal protective equipment Disinfection of contaminated surfaces Quarantine of suspected cases Vaccination	1	1	1	1	1	0	Isolation wards/rooms Personal Protective Equipment (e.g gloves, masks, gowns) Hand washing stations with soap and water Alcohol based hand sanitizer Disinfectants for surface cleaning Adequate waste disposal system for medical waste	1	1	1	1	1
2025-07-05 22:48:49	2025-07-05 22:50:43	29	Female	Bachelor's degree	Doctor	Less than 5 years	Pediatrics	Yes	Colleagues/workplace	Somewhat familiar	Fever Rash Headache Muscle aches Swollen lymph nodes Skin lesions	1	1	1	1	1	0	1	0	Contact with infected animals Direct contact with skin lesions of an infected person Respiratory droplets	1	1	1	0	0	0	Yes	Equally serious	No	Moderately concerned	No	Strongly agree	No		Somewhat confident	Not sure	Isolation of infected patients Use of personal protective equipment Disinfection of contaminated surfaces	1	1	1	0	0	0	Isolation wards/rooms Personal Protective Equipment (e.g gloves, masks, gowns) Hand washing stations with soap and water Alcohol based hand sanitizer Disinfectants for surface cleaning Communication and reporting tools (e.g., phones, computer, internet access) Adequate waste disposal system for medical waste Ambulance services for patient transfer Adequate electricity supply and backup generators	1	1	1	1	1
2025-07-05 22:50:43	2025-07-05 22:52:31	44	Male	Postgraduate degree	Doctor	11-15 years	Others	Yes	Scientific journals	Very familiar	Fever Rash Muscle aches Swollen lymph nodes Skin lesions	1	1	0	1	1	0	1	0	Contact with infected animals Direct contact with skin lesions of an infected person Touching contaminated objects or surfaces	1	1	0	0	1	0	Yes	Equally serious	Yes	Very concerned	No	Strongly agree	No		Very confident	No	Isolation of infected patients Use of personal protective equipment Disinfection of contaminated surfaces Quarantine of suspected cases	1	1	1	1	0	0	Isolation wards/rooms Personal Protective Equipment (e.g gloves, masks, gowns) Hand washing stations with soap and water Alcohol based hand sanitizer Disinfectants for surface cleaning Laboratory facilities for diagnostic testing Communication and reporting tools (e.g., phones, computer, internet access) Adequate waste disposal system for medical waste Ambulance services for patient transfer Adeq…	1	1	1	1	1
2025-07-05 22:52:31	2025-07-05 22:53:20	24	Male	Bachelor's degree	Doctor	Less than 5 years	Pediatrics	Yes
2025-07-05 22:53:20	2025-07-05 22:55:09	35	Female	Bachelor's degree	Others	Less than 5 years	Others	Yes	Social media	Somewhat familiar	Fever Rash Headache Muscle aches Swollen lymph nodes Skin lesions	1	1	1	1	1	0	1	0	Contact with infected animals	1	0	0	0	0	0	Yes	Equally serious	Yes	Very concerned	No	Strongly agree	No		Not confident at all	Not sure	Isolation of infected patients Use of personal protective equipment Disinfection of contaminated surfaces Quarantine of suspected cases Vaccination	1	1	1	1	1	0	Isolation wards/rooms Adequate waste disposal system for medical waste Ambulance services for patient transfer Adequate electricity supply and backup generators	1	0	0	0	0
2025-07-05 22:55:09	2025-07-05 22:57:33	39	Female	Postgraduate degree	Nurses	11-15 years	Emergency Care	Yes	Others	Somewhat familiar	Fever Rash Headache Muscle aches Difficulty breathing Skin lesions	1	1	1	1	0	1	1	0	Direct contact with skin lesions of an infected person Respiratory droplets Touching contaminated objects or surfaces	0	1	1	0	1	0	Yes	Equally serious	Yes	Very concerned	No	Agree	No		Somewhat confident	No	Isolation of infected patients Use of personal protective equipment Disinfection of contaminated surfaces Quarantine of suspected cases	1	1	1	1	0	0	Isolation wards/rooms Personal Protective Equipment (e.g gloves, masks, gowns) Hand washing stations with soap and water Alcohol based hand sanitizer Disinfectants for surface cleaning Ambulance services for patient transfer	1	1	1	1	1
2025-07-05 22:57:33	2025-07-05 23:02:01	40	Female	Bachelor's degree	Nurses	11-15 years	Pediatrics	Yes	TV/Radio	Very familiar	Fever Rash Headache Muscle aches Swollen lymph nodes Skin lesions	1	1	1	1	1	0	1	0	Contact with infected animals Direct contact with skin lesions of an infected person Respiratory droplets Sexual contact Touching contaminated objects or surfaces	1	1	1	1	1	0	Yes	More serious	Yes	Very concerned	No	Strongly agree	No		Somewhat confident	No	Isolation of infected patients Use of personal protective equipment Disinfection of contaminated surfaces Quarantine of suspected cases Vaccination	1	1	1	1	1	0	Isolation wards/rooms Personal Protective Equipment (e.g gloves, masks, gowns) Hand washing stations with soap and water Alcohol based hand sanitizer Disinfectants for surface cleaning Communication and reporting tools (e.g., phones, computer, internet access) Adequate waste disposal system for medical waste Ambulance services for patient transfer Adequate electricity supply and backup generators	1	1	1	1	1
2025-07-05 23:02:01	2025-07-05 23:04:36	35	Female	Postgraduate degree	Nurses	5-10 years	Pediatrics	Yes	Scientific journals	Somewhat familiar	Fever Rash Swollen lymph nodes Difficulty breathing Skin lesions	1	1	0	0	1	1	1	0	Contact with infected animals Direct contact with skin lesions of an infected person Respiratory droplets	1	1	1	0	0	0	Yes	Equally serious	Yes	Moderately concerned	No	Strongly agree	No		Not confident at all	No	Isolation of infected patients Use of personal protective equipment Disinfection of contaminated surfaces Quarantine of suspected cases Vaccination	1	1	1	1	1	0	Isolation wards/rooms Personal Protective Equipment (e.g gloves, masks, gowns) Hand washing stations with soap and water Alcohol based hand sanitizer Disinfectants for surface cleaning Laboratory facilities for diagnostic testing	1	1	1	1	1
2025-07-05 23:04:36	2025-07-05 23:07:22	24	Female	Bachelor's degree	Medical laboratory scientist	Less than 5 years	Laboratory Services	Yes	Social media	Somewhat familiar	Fever Rash	1	1	0	0	0	0	0	0	Direct contact with skin lesions of an infected person Respiratory droplets	0	1	1	0	0	0	Yes	Equally serious	Yes	Very concerned	Not sure	Strongly agree	Not sure		Not confident at all	No	Isolation of infected patients	1	0	0	0	0	0	Isolation wards/rooms Adequate waste disposal system for medical waste Ambulance services for patient transfer Adequate electricity supply and backup generators	1	0	0	0	0
2025-07-05 23:07:22	2025-07-06 21:53:16	25	Female	Bachelor's degree	Nurses	Less than 5 years	Others	Yes	Others	Somewhat familiar	Fever Rash Headache Muscle aches Swollen lymph nodes Skin lesions	1	1	1	1	1	0	1	0	Contact with infected animals Direct contact with skin lesions of an infected person Respiratory droplets Sexual contact Touching contaminated objects or surfaces	1	1	1	1	1	0	Yes			Very concerned	No	Strongly agree	No		Not confident at all	Not sure	Isolation of infected patients Use of personal protective equipment Disinfection of contaminated surfaces Quarantine of suspected cases Vaccination	1	1	1	1	1	0	Hand washing stations with soap and water Alcohol based hand sanitizer Disinfectants for surface cleaning Laboratory facilities for diagnostic testing Adequate waste disposal system for medical waste Ambulance services for patient transfer Adequate electricity supply and backup generators Cold chain storage for vaccines or laboratory specimens	0	0	1	1	1
2025-07-06 21:53:16	2025-07-06 21:54:51	33	Female	Bachelor's degree	Medical laboratory scientist	5-10 years	Laboratory Services	Yes	TV/Radio	Somewhat familiar	Rash	0	1	0	0	0	0	0	0								Yes			Very concerned	No	Agree	Not sure		Not confident at all	Not sure	Vaccination	0	0	0	0	1	0	Vaccine for mpox prevention	0	0	0	0	0
2025-07-06 21:54:51	2025-07-06 21:56:23			Bachelor's degree	Medical laboratory scientist	Less than 5 years	Laboratory Services	Yes	Scientific journals	Somewhat familiar	Rash Swollen lymph nodes Difficulty breathing	0	1	0	0	1	1	0	0	Contact with infected animals	1	0	0	0	0	0	Yes			Very concerned	No	Strongly agree	No		Not confident at all	Not sure	Isolation of infected patients Use of personal protective equipment Disinfection of contaminated surfaces	1	1	1	0	0	0	Personal Protective Equipment (e.g gloves, masks, gowns)	0	1	0	0	0
2025-07-06 21:56:23	2025-07-06 21:57:53		Female					Yes	TV/Radio	Not familiar at all	Rash	0	1	0	0	0	0	0	0	Contact with infected animals Direct contact with skin lesions of an infected person Touching contaminated objects or surfaces	1	1	0	0	1	0	Yes			Very concerned	No	Strongly agree	No		Not confident at all	No	Vaccination	0	0	0	0	1	0	Isolation wards/rooms Personal Protective Equipment (e.g gloves, masks, gowns) Hand washing stations with soap and water Alcohol based hand sanitizer Disinfectants for surface cleaning Laboratory facilities for diagnostic testing Vaccine for mpox prevention Rapid response team or taskforce for outbreak management Communication and reporting tools (e.g., phones, computer, internet access) Standard…	1	1	1	1	1
2025-07-06 21:57:53	2025-07-06 21:59:29	40	Male	Bachelor's degree	Medical laboratory scientist	11-15 years	Laboratory Services	Yes	Colleagues/workplace	Somewhat familiar	Fever Rash Headache Muscle aches Swollen lymph nodes Difficulty breathing Skin lesions	1	1	1	1	1	1	1	0	Contact with infected animals Direct contact with skin lesions of an infected person Respiratory droplets Touching contaminated objects or surfaces	1	1	1	0	1	0	Yes			Very concerned	No	Strongly agree	No		Not confident at all	Not sure	Isolation of infected patients Use of personal protective equipment Disinfection of contaminated surfaces Quarantine of suspected cases Vaccination	1	1	1	1	1	0	Isolation wards/rooms Personal Protective Equipment (e.g gloves, masks, gowns) Hand washing stations with soap and water Alcohol based hand sanitizer Disinfectants for surface cleaning	1	1	1	1	1
2025-07-06 21:59:29	2025-07-06 22:01:08	30	Male	Bachelor's degree	Medical laboratory scientist	Less than 5 years	Laboratory Services	Yes	TV/Radio	Somewhat familiar	Fever Rash Headache Swollen lymph nodes Skin lesions	1	1	1	0	1	0	1	0	Contact with infected animals	1	0	0	0	0	0	Yes			Moderately concerned	Yes	Strongly agree	Not sure		Not confident at all	Not sure	Use of personal protective equipment	0	1	0	0	0	0	Personal Protective Equipment (e.g gloves, masks, gowns) Hand washing stations with soap and water Alcohol based hand sanitizer Disinfectants for surface cleaning Laboratory facilities for diagnostic testing Adequate waste disposal system for medical waste Ambulance services for patient transfer Adequate electricity supply and backup generators	0	1	1	1	1
2025-07-06 22:01:08	2025-07-06 22:03:05	23	Female	Bachelor's degree	Medical laboratory scientist	Less than 5 years	Laboratory Services	Yes	TV/Radio	Somewhat familiar	Fever Rash Headache Muscle aches Swollen lymph nodes Skin lesions	1	1	1	1	1	0	1	0	Contact with infected animals Direct contact with skin lesions of an infected person	1	1	0	0	0	0	Yes			Very concerned	No	Strongly agree	Not sure		Not confident at all	Not sure	Isolation of infected patients Use of personal protective equipment Disinfection of contaminated surfaces Quarantine of suspected cases Vaccination	1	1	1	1	1	0	Personal Protective Equipment (e.g gloves, masks, gowns) Hand washing stations with soap and water Alcohol based hand sanitizer Disinfectants for surface cleaning	0	1	1	1	1
2025-07-06 22:03:05	2025-07-06 22:05:19	25	Female	Diploma/Certificate	Medical laboratory scientist	Less than 5 years	Laboratory Services	Yes	Others	Not familiar at all	Fever Rash Skin lesions	1	1	0	0	0	0	1	0	Contact with infected animals Direct contact with skin lesions of an infected person	1	1	0	0	0	0	Yes			Moderately concerned	Yes	Agree	No		Not confident at all	No	Isolation of infected patients Use of personal protective equipment Quarantine of suspected cases Vaccination	1	1	0	1	1	0	Personal Protective Equipment (e.g gloves, masks, gowns) Alcohol based hand sanitizer Laboratory facilities for diagnostic testing Mpox-specific diagnostic kits Vaccine for mpox prevention Stock of antiviral medications for mpox treatment Standard treatment guidelines or protocol for mpox Ambulance services for patient transfer Cold chain storage for vaccines or laboratory specimens Community awa…	0	1	0	1	0
2025-07-06 22:05:19	2025-07-06 22:06:53	33	Male	Bachelor's degree	Medical laboratory scientist	Less than 5 years	Laboratory Services	Yes	Social media	Somewhat familiar	Fever Rash Headache Muscle aches Swollen lymph nodes Difficulty breathing Skin lesions	1	1	1	1	1	1	1	0	Contact with infected animals Direct contact with skin lesions of an infected person Respiratory droplets Sexual contact Touching contaminated objects or surfaces	1	1	1	1	1	0	Yes			Very concerned	No	Strongly agree	No		Somewhat confident	Yes	Isolation of infected patients Use of personal protective equipment Disinfection of contaminated surfaces Quarantine of suspected cases Vaccination	1	1	1	1	1	0	Isolation wards/rooms Personal Protective Equipment (e.g gloves, masks, gowns) Hand washing stations with soap and water Alcohol based hand sanitizer Disinfectants for surface cleaning Laboratory facilities for diagnostic testing Mpox-specific diagnostic kits Vaccine for mpox prevention Stock of antiviral medications for mpox treatment Rapid response team or taskforce for outbreak management Comm…	1	1	1	1	1
2025-07-06 22:06:53	2025-07-06 22:08:21		Female	Bachelor's degree	Medical laboratory scientist	Less than 5 years	Laboratory Services	Yes	Colleagues/workplace	Very familiar	Fever Rash Skin lesions	1	1	0	0	0	0	1	0	Contact with infected animals Direct contact with skin lesions of an infected person Respiratory droplets Sexual contact Touching contaminated objects or surfaces	1	1	1	1	1	0	Yes			Very concerned	Yes	Strongly agree	Yes	In-person Training	Very confident	Yes	Isolation of infected patients Use of personal protective equipment Disinfection of contaminated surfaces Quarantine of suspected cases Vaccination	1	1	1	1	1	0	Isolation wards/rooms Personal Protective Equipment (e.g gloves, masks, gowns) Hand washing stations with soap and water Alcohol based hand sanitizer Disinfectants for surface cleaning Laboratory facilities for diagnostic testing Mpox-specific diagnostic kits Vaccine for mpox prevention	1	1	1	1	1
2025-07-06 22:08:21	2025-07-06 22:10:30		Female	Bachelor's degree	Medical laboratory scientist	Less than 5 years	Laboratory Services	Yes	TV/Radio	Somewhat familiar	Fever Rash Muscle aches Swollen lymph nodes Skin lesions	1	1	0	1	1	0	1	0	Direct contact with skin lesions of an infected person Respiratory droplets Sexual contact Touching contaminated objects or surfaces	0	1	1	1	1	0	Yes			Moderately concerned	Not sure	Strongly agree	Not sure		Somewhat confident	Not sure	Isolation of infected patients Use of personal protective equipment Disinfection of contaminated surfaces Quarantine of suspected cases Vaccination	1	1	1	1	1	0	Isolation wards/rooms Personal Protective Equipment (e.g gloves, masks, gowns) Hand washing stations with soap and water Alcohol based hand sanitizer Disinfectants for surface cleaning Laboratory facilities for diagnostic testing	1	1	1	1	1
2025-07-06 22:10:30	2025-07-06 22:12:02	25	Male	Bachelor's degree	Medical laboratory scientist	Less than 5 years	Laboratory Services	Yes	TV/Radio	Somewhat familiar	Fever Rash Swollen lymph nodes Skin lesions	1	1	0	0	1	0	1	0	Contact with infected animals Direct contact with skin lesions of an infected person Respiratory droplets Sexual contact	1	1	1	1	0	0	Yes			Moderately concerned	Yes	Strongly agree	Not sure		Not confident at all		Isolation of infected patients Use of personal protective equipment Disinfection of contaminated surfaces Quarantine of suspected cases Vaccination	1	1	1	1	1	0	Personal Protective Equipment (e.g gloves, masks, gowns) Hand washing stations with soap and water Alcohol based hand sanitizer Disinfectants for surface cleaning Laboratory facilities for diagnostic testing Mpox-specific diagnostic kits	0	1	1	1	1
2025-07-06 22:12:02	2025-07-06 22:14:03		Female	Bachelor's degree	Medical laboratory scientist	Less than 5 years	Laboratory Services	Yes	TV/Radio	Somewhat familiar										Contact with infected animals Direct contact with skin lesions of an infected person Respiratory droplets Sexual contact Touching contaminated objects or surfaces	1	1	1	1	1	0	Yes	Less serious	Yes	Moderately concerned	No	Strongly agree	No		Not confident at all	Not sure	Isolation of infected patients Use of personal protective equipment Disinfection of contaminated surfaces Quarantine of suspected cases Vaccination	1	1	1	1	1	0	Isolation wards/rooms Personal Protective Equipment (e.g gloves, masks, gowns) Hand washing stations with soap and water Alcohol based hand sanitizer Disinfectants for surface cleaning Communication and reporting tools (e.g., phones, computer, internet access) Ambulance services for patient transfer Cold chain storage for vaccines or laboratory specimens	1	1	1	1	1
2025-07-06 22:14:03	2025-07-06 22:15:40	25	Female	Bachelor's degree	Medical laboratory scientist	Less than 5 years	Laboratory Services	Yes	Scientific journals	Somewhat familiar	Fever Rash Headache Muscle aches Swollen lymph nodes Skin lesions	1	1	1	1	1	0	1	0	Contact with infected animals Direct contact with skin lesions of an infected person Touching contaminated objects or surfaces	1	1	0	0	1	0	Yes			Very concerned	No	Strongly agree	No		Somewhat confident	No	Isolation of infected patients Use of personal protective equipment Disinfection of contaminated surfaces Quarantine of suspected cases Vaccination	1	1	1	1	1	0	Personal Protective Equipment (e.g gloves, masks, gowns) Hand washing stations with soap and water Alcohol based hand sanitizer Disinfectants for surface cleaning Vaccine for mpox prevention	0	1	1	1	1
2025-07-06 22:15:40	2025-07-06 22:17:22	27	Female	Bachelor's degree	Medical laboratory scientist	5-10 years	Laboratory Services	Yes	TV/Radio	Somewhat familiar	Fever Rash Headache Swollen lymph nodes Skin lesions	1	1	1	0	1	0	1	0	Contact with infected animals Respiratory droplets Touching contaminated objects or surfaces	1	0	1	0	1	0	Yes			Very concerned	No	Strongly agree	No		Not confident at all	Not sure	Isolation of infected patients Use of personal protective equipment Disinfection of contaminated surfaces Vaccination	1	1	1	0	1	0	Isolation wards/rooms Personal Protective Equipment (e.g gloves, masks, gowns) Hand washing stations with soap and water Disinfectants for surface cleaning Laboratory facilities for diagnostic testing Communication and reporting tools (e.g., phones, computer, internet access) Adequate waste disposal system for medical waste Ambulance services for patient transfer	1	1	1	0	1
2025-07-06 22:17:23	2025-07-06 22:18:53	27	Female	Bachelor's degree	Medical laboratory scientist	5-10 years	Laboratory Services	Yes	Social media	Somewhat familiar	Fever Rash Skin lesions	1	1	0	0	0	0	1	0	Contact with infected animals Direct contact with skin lesions of an infected person Touching contaminated objects or surfaces	1	1	0	0	1	0	Yes			Moderately concerned	No	Strongly agree	Not sure		Not confident at all		Isolation of infected patients Use of personal protective equipment Disinfection of contaminated surfaces Quarantine of suspected cases	1	1	1	1	0	0	Isolation wards/rooms Personal Protective Equipment (e.g gloves, masks, gowns) Hand washing stations with soap and water Alcohol based hand sanitizer Disinfectants for surface cleaning Adequate waste disposal system for medical waste	1	1	1	1	1
2025-07-06 22:18:53	2025-07-06 22:20:17	30	Female	Bachelor's degree	Medical laboratory scientist	Less than 5 years	Laboratory Services	Yes	TV/Radio	Somewhat familiar	Fever Rash Skin lesions	1	1	0	0	0	0	1	0	Direct contact with skin lesions of an infected person	0	1	0	0	0	0	Yes			Moderately concerned	No	Strongly agree	No		Not confident at all	Not sure	Isolation of infected patients Use of personal protective equipment Disinfection of contaminated surfaces	1	1	1	0	0	0	Isolation wards/rooms Personal Protective Equipment (e.g gloves, masks, gowns) Hand washing stations with soap and water Alcohol based hand sanitizer Disinfectants for surface cleaning	1	1	1	1	1
2025-07-06 22:20:17	2025-07-06 22:22:37	30	Female	Bachelor's degree	Medical laboratory scientist	5-10 years	Laboratory Services	Yes	Others	Somewhat familiar	Fever Rash Headache	1	1	1	0	0	0	0	0	Contact with infected animals Direct contact with skin lesions of an infected person	1	1	0	0	0	0	Yes			Very concerned	Yes	Strongly agree	No		Very confident	No	Isolation of infected patients Use of personal protective equipment Disinfection of contaminated surfaces Quarantine of suspected cases	1	1	1	1	0	0	Isolation wards/rooms Personal Protective Equipment (e.g gloves, masks, gowns) Hand washing stations with soap and water Alcohol based hand sanitizer Disinfectants for surface cleaning Laboratory facilities for diagnostic testing Rapid response team or taskforce for outbreak management Communication and reporting tools (e.g., phones, computer, internet access) Standard treatment guidelines or pro…	1	1	1	1	1
2025-07-06 22:22:37	2025-07-06 22:25:15	40	Female	Postgraduate degree	Medical laboratory scientist	11-15 years	Laboratory Services	Yes	Social media	Somewhat familiar	Fever Skin lesions	1	0	0	0	0	0	1	0	Contact with infected animals Direct contact with skin lesions of an infected person	1	1	0	0	0	0	Yes			Moderately concerned	No	Strongly agree	No		Not confident at all	Not sure	Isolation of infected patients Use of personal protective equipment Disinfection of contaminated surfaces Quarantine of suspected cases	1	1	1	1	0	0	Isolation wards/rooms Personal Protective Equipment (e.g gloves, masks, gowns) Hand washing stations with soap and water Alcohol based hand sanitizer Disinfectants for surface cleaning Ambulance services for patient transfer	1	1	1	1	1
2025-07-06 22:25:15	2025-07-06 22:26:44		Female	Postgraduate degree	Medical laboratory scientist	11-15 years	Laboratory Services	Yes	Social media	Somewhat familiar	Fever Difficulty breathing Skin lesions	1	0	0	0	0	1	1	0	Contact with infected animals Direct contact with skin lesions of an infected person	1	1	0	0	0	0	Yes			Moderately concerned	No	Agree	No		Somewhat confident	Not sure	Isolation of infected patients Use of personal protective equipment Disinfection of contaminated surfaces Quarantine of suspected cases	1	1	1	1	0	0	Isolation wards/rooms Personal Protective Equipment (e.g gloves, masks, gowns) Alcohol based hand sanitizer Ambulance services for patient transfer Adequate electricity supply and backup generators	1	1	0	1	0
2025-07-06 22:26:44	2025-07-06 22:31:55	26	Male	Bachelor's degree	Medical laboratory scientist	Less than 5 years	Laboratory Services	Yes	Colleagues/workplace	Not familiar at all	Fever Rash Muscle aches	1	1	0	1	0	0	0	0	I don't know	0	0	0	0	0	1	Not sure			Not concerned at all	No	Agree	No		Not confident at all	Not sure	Isolation of infected patients Use of personal protective equipment	1	1	0	0	0	0	Isolation wards/rooms Hand washing stations with soap and water	1	0	1	0	0
2025-07-06 22:31:55	2025-07-06 22:34:13	39	Female	Bachelor's degree	Medical laboratory scientist	11-15 years	Laboratory Services	Yes	TV/Radio	Very familiar	Rash Swollen lymph nodes Difficulty breathing Skin lesions	0	1	0	0	1	1	1	0	Contact with infected animals Direct contact with skin lesions of an infected person Respiratory droplets Sexual contact	1	1	1	1	0	0	Yes			Very concerned	Yes	Agree	Yes	Online training	Somewhat confident	No	Isolation of infected patients Use of personal protective equipment Disinfection of contaminated surfaces Quarantine of suspected cases	1	1	1	1	0	0	Isolation wards/rooms Personal Protective Equipment (e.g gloves, masks, gowns) Hand washing stations with soap and water Alcohol based hand sanitizer Laboratory facilities for diagnostic testing Communication and reporting tools (e.g., phones, computer, internet access) Ambulance services for patient transfer	1	1	1	1	0
2025-07-06 22:34:13	2025-07-06 22:36:03	23	Male	Bachelor's degree	Medical laboratory scientist	Less than 5 years	Laboratory Services	No		Somewhat familiar	Fever Rash Headache Skin lesions	1	1	1	0	0	0	1	0	Contact with infected animals Direct contact with skin lesions of an infected person	1	1	0	0	0	0	Yes			Very concerned	No	Strongly agree	No		Somewhat confident	Not sure	Isolation of infected patients Use of personal protective equipment Disinfection of contaminated surfaces Quarantine of suspected cases	1	1	1	1	0	0	Personal Protective Equipment (e.g gloves, masks, gowns) Hand washing stations with soap and water Alcohol based hand sanitizer Disinfectants for surface cleaning Laboratory facilities for diagnostic testing Adequate waste disposal system for medical waste Ambulance services for patient transfer	0	1	1	1	1
2025-07-06 22:36:03	2025-07-06 22:38:10		Male	Bachelor's degree	Medical laboratory scientist	More than 15 years	Laboratory Services	Yes	Scientific journals	Very familiar	Rash	0	1	0	0	0	0	0	0	Touching contaminated objects or surfaces	0	0	0	0	1	0	Yes			Very concerned	No	Strongly agree	No		Not confident at all	Not sure	Use of personal protective equipment	0	1	0	0	0	0	Isolation wards/rooms	1	0	0	0	0
2025-07-06 22:38:10	2025-07-06 22:40:16		Female	Bachelor's degree	Medical laboratory scientist	Less than 5 years	Laboratory Services	Yes	TV/Radio	Not familiar at all	Fever Rash Headache Skin lesions	1	1	1	0	0	0	1	0	Direct contact with skin lesions of an infected person	0	1	0	0	0	0	Yes			Moderately concerned	No	Strongly agree			Not confident at all	Yes	Isolation of infected patients Use of personal protective equipment Disinfection of contaminated surfaces Quarantine of suspected cases	1	1	1	1	0	0	Isolation wards/rooms Personal Protective Equipment (e.g gloves, masks, gowns) Hand washing stations with soap and water Alcohol based hand sanitizer Disinfectants for surface cleaning Laboratory facilities for diagnostic testing Communication and reporting tools (e.g., phones, computer, internet access) Standard treatment guidelines or protocol for mpox Adequate waste disposal system for medical…	1	1	1	1	1
2025-07-06 22:40:16	2025-07-06 22:42:17	19	Male	Bachelor's degree	Medical laboratory scientist	Less than 5 years	Laboratory Services	Yes	Scientific journals	Somewhat familiar	Fever Rash Headache	1	1	1	0	0	0	0	0	Direct contact with skin lesions of an infected person Touching contaminated objects or surfaces	0	1	0	0	1	0	Yes			Very concerned	Not sure	Strongly agree	Yes	In-person Training	Somewhat confident	No	Isolation of infected patients Use of personal protective equipment Disinfection of contaminated surfaces Quarantine of suspected cases Vaccination	1	1	1	1	1	0	Isolation wards/rooms Personal Protective Equipment (e.g gloves, masks, gowns) Hand washing stations with soap and water Alcohol based hand sanitizer Disinfectants for surface cleaning Laboratory facilities for diagnostic testing Rapid response team or taskforce for outbreak management	1	1	1	1	1
2025-07-06 22:42:17	2025-07-06 22:44:07	25	Male	Bachelor's degree	Medical laboratory scientist	Less than 5 years	Laboratory Services	Yes	Scientific journals	Very familiar	Fever Rash Swollen lymph nodes Skin lesions	1	1	0	0	1	0	1	0	Contact with infected animals Direct contact with skin lesions of an infected person Touching contaminated objects or surfaces	1	1	0	0	1	0	Yes			Very concerned	No	Strongly agree	No		Not confident at all	No	Isolation of infected patients Use of personal protective equipment Disinfection of contaminated surfaces Quarantine of suspected cases	1	1	1	1	0	0	Isolation wards/rooms Personal Protective Equipment (e.g gloves, masks, gowns) Alcohol based hand sanitizer Disinfectants for surface cleaning Stock of antiviral medications for mpox treatment Ambulance services for patient transfer	1	1	0	1	1
2025-07-06 22:44:07	2025-07-08 07:00:42	26	Male	Bachelor's degree	Medical laboratory scientist	Less than 5 years	Laboratory Services	Yes	Social media	Somewhat familiar	Fever Rash Headache Swollen lymph nodes Skin lesions	1	1	1	0	1	0	1	0	Contact with infected animals Direct contact with skin lesions of an infected person Respiratory droplets Sexual contact Touching contaminated objects or surfaces	1	1	1	1	1	0	Yes			Not concerned at all	Not sure	Strongly agree	No		Not confident at all	Not sure	Isolation of infected patients Use of personal protective equipment Disinfection of contaminated surfaces Quarantine of suspected cases Vaccination	1	1	1	1	1	0	Isolation wards/rooms Personal Protective Equipment (e.g gloves, masks, gowns) Hand washing stations with soap and water Alcohol based hand sanitizer Disinfectants for surface cleaning Laboratory facilities for diagnostic testing Vaccine for mpox prevention Communication and reporting tools (e.g., phones, computer, internet access) Adequate waste disposal system for medical waste Adequate electri…	1	1	1	1	1
2025-07-08 07:00:42	2025-07-08 07:02:45	27	Male	Bachelor's degree	Medical laboratory scientist	Less than 5 years	Laboratory Services	Yes	TV/Radio	Somewhat familiar	Fever Rash Skin lesions	1	1	0	0	0	0	1	0	Direct contact with skin lesions of an infected person Respiratory droplets Touching contaminated objects or surfaces	0	1	1	0	1	0	Yes			Moderately concerned	No	Strongly agree	Not sure		Not confident at all	Yes	Isolation of infected patients Use of personal protective equipment Disinfection of contaminated surfaces Vaccination	1	1	1	0	1	0	Isolation wards/rooms Personal Protective Equipment (e.g gloves, masks, gowns) Hand washing stations with soap and water Alcohol based hand sanitizer Disinfectants for surface cleaning Laboratory facilities for diagnostic testing Rapid response team or taskforce for outbreak management Adequate waste disposal system for medical waste Ambulance services for patient transfer Cold chain storage for …	1	1	1	1	1
2025-07-08 07:02:45	2025-07-08 07:04:36	27	Male	Bachelor's degree	Medical laboratory scientist	Less than 5 years	Laboratory Services	Yes	TV/Radio	Somewhat familiar	Fever Rash Muscle aches Skin lesions	1	1	0	1	0	0	1	0											Very concerned	No	Strongly agree	No		Not confident at all	Not sure	Isolation of infected patients Use of personal protective equipment Disinfection of contaminated surfaces Vaccination	1	1	1	0	1	0	Isolation wards/rooms Personal Protective Equipment (e.g gloves, masks, gowns) Hand washing stations with soap and water Alcohol based hand sanitizer Disinfectants for surface cleaning Laboratory facilities for diagnostic testing Ambulance services for patient transfer	1	1	1	1	1
2025-07-08 07:04:36	2025-07-08 07:06:01	25	Male	Bachelor's degree	Medical laboratory scientist	Less than 5 years	Laboratory Services	Yes	TV/Radio	Not familiar at all	Fever Rash	1	1	0	0	0	0	0	0	I don't know	0	0	0	0	0	1	Yes			Very concerned	No	Strongly agree	No		Not confident at all	Yes	Isolation of infected patients Use of personal protective equipment Disinfection of contaminated surfaces Quarantine of suspected cases Vaccination	1	1	1	1	1	0	Isolation wards/rooms Personal Protective Equipment (e.g gloves, masks, gowns) Hand washing stations with soap and water Alcohol based hand sanitizer Disinfectants for surface cleaning Laboratory facilities for diagnostic testing Adequate electricity supply and backup generators	1	1	1	1	1
2025-07-08 07:06:01	2025-07-08 07:07:36	45	Female	Postgraduate degree	Medical laboratory scientist	More than 15 years	Laboratory Services	Yes	Social media	Somewhat familiar	Fever Rash Headache Muscle aches Swollen lymph nodes Difficulty breathing Skin lesions	1	1	1	1	1	1	1	0	Contact with infected animals Direct contact with skin lesions of an infected person Respiratory droplets Sexual contact Touching contaminated objects or surfaces	1	1	1	1	1	0	Yes			Very concerned	No	Strongly agree	No		Not confident at all	No	Isolation of infected patients Use of personal protective equipment Disinfection of contaminated surfaces Quarantine of suspected cases Vaccination	1	1	1	1	1	0	Isolation wards/rooms Personal Protective Equipment (e.g gloves, masks, gowns) Hand washing stations with soap and water Alcohol based hand sanitizer	1	1	1	1	0
2025-07-08 07:07:36	2025-07-08 07:09:02		Female	Bachelor's degree	Medical laboratory scientist	5-10 years	Laboratory Services	Yes	Social media	Not familiar at all	Rash Skin lesions	0	1	0	0	0	0	1	0	Contact with infected animals	1	0	0	0	0	0	Yes			Moderately concerned	No	Agree	No		Not confident at all	No	Isolation of infected patients Use of personal protective equipment Disinfection of contaminated surfaces Quarantine of suspected cases Vaccination I am not familiar with any preventive measures	1	1	1	1	1	1	Personal Protective Equipment (e.g gloves, masks, gowns) Hand washing stations with soap and water Alcohol based hand sanitizer Disinfectants for surface cleaning Adequate waste disposal system for medical waste Ambulance services for patient transfer Adequate electricity supply and backup generators	0	1	1	1	1
2025-07-08 07:09:02	2025-07-08 07:10:49		Male	Bachelor's degree	Medical laboratory scientist	Less than 5 years	Laboratory Services	Yes	Others	Somewhat familiar	Fever Rash Headache Muscle aches Swollen lymph nodes Difficulty breathing Skin lesions	1	1	1	1	1	1	1	0	Contact with infected animals Direct contact with skin lesions of an infected person Respiratory droplets Sexual contact Touching contaminated objects or surfaces	1	1	1	1	1	0	Yes			Very concerned	No	Strongly agree	Not sure		Somewhat confident	Yes	Isolation of infected patients Use of personal protective equipment Disinfection of contaminated surfaces Quarantine of suspected cases Vaccination	1	1	1	1	1	0	Isolation wards/rooms Personal Protective Equipment (e.g gloves, masks, gowns) Hand washing stations with soap and water Alcohol based hand sanitizer Disinfectants for surface cleaning Laboratory facilities for diagnostic testing Mpox-specific diagnostic kits Adequate waste disposal system for medical waste Ambulance services for patient transfer	1	1	1	1	1
2025-07-08 07:10:49	2025-07-08 07:12:15	27	Male	Bachelor's degree	Medical laboratory scientist	Less than 5 years	Laboratory Services	Yes	Social media	Somewhat familiar	Fever Rash Headache Skin lesions	1	1	1	0	0	0	1	0	Direct contact with skin lesions of an infected person Touching contaminated objects or surfaces	0	1	0	0	1	0	Not sure			Not concerned at all	No	Agree	No		Not confident at all	No	Use of personal protective equipment Disinfection of contaminated surfaces Quarantine of suspected cases Vaccination	0	1	1	1	1	0	Personal Protective Equipment (e.g gloves, masks, gowns) Hand washing stations with soap and water Alcohol based hand sanitizer	0	1	1	1	0
2025-07-08 07:12:15	2025-07-09 02:02:16	23	Female	Bachelor's degree	Medical laboratory scientist	Less than 5 years	Laboratory Services	Yes	Others	Somewhat familiar	Fever Skin lesions	1	0	0	0	0	0	1	0	Direct contact with skin lesions of an infected person	0	1	0	0	0	0	Yes			Very concerned	No	Strongly agree	No		Not confident at all	No	Use of personal protective equipment	0	1	0	0	0	0
2025-07-09 02:02:16	2025-07-09 02:04:14	29	Female	Bachelor's degree	Medical laboratory scientist	Less than 5 years	Laboratory Services	Yes	Others	Somewhat familiar	Skin lesions	0	0	0	0	0	0	1	0	Direct contact with skin lesions of an infected person	0	1	0	0	0	0	Yes			Very concerned	Not sure	Strongly agree	Not sure		Somewhat confident	Not sure	Disinfection of contaminated surfaces	0	0	1	0	0	0	Isolation wards/rooms Personal Protective Equipment (e.g gloves, masks, gowns) Hand washing stations with soap and water Alcohol based hand sanitizer Disinfectants for surface cleaning Stock of antiviral medications for mpox treatment Rapid response team or taskforce for outbreak management	1	1	1	1	1
2025-07-09 02:04:14	2025-07-09 02:05:55	25	Female	Bachelor's degree	Medical laboratory scientist	Less than 5 years	Laboratory Services	Yes	Colleagues/workplace	Somewhat familiar	Fever Rash Headache Muscle aches Swollen lymph nodes Difficulty breathing Skin lesions	1	1	1	1	1	1	1	0	Contact with infected animals Direct contact with skin lesions of an infected person Respiratory droplets Touching contaminated objects or surfaces	1	1	1	0	1	0	Yes			Very concerned	No	Strongly agree	No		Somewhat confident	Not sure	Isolation of infected patients Use of personal protective equipment Disinfection of contaminated surfaces Quarantine of suspected cases Vaccination	1	1	1	1	1	0	Isolation wards/rooms Personal Protective Equipment (e.g gloves, masks, gowns) Hand washing stations with soap and water Laboratory facilities for diagnostic testing Training programs for health workers on mpox management	1	1	1	0	0
2025-07-09 02:05:55	2025-07-09 02:07:16	26	Female	Bachelor's degree	Medical laboratory scientist	Less than 5 years	Laboratory Services	Yes	Social media	Somewhat familiar	Fever Headache Muscle aches Swollen lymph nodes	1	0	1	1	1	0	0	0	Contact with infected animals Direct contact with skin lesions of an infected person Touching contaminated objects or surfaces	1	1	0	0	1	0	Yes			Very concerned	No	Strongly agree	No		Somewhat confident	Yes	Isolation of infected patients Use of personal protective equipment Disinfection of contaminated surfaces Quarantine of suspected cases	1	1	1	1	0	0	Isolation wards/rooms Personal Protective Equipment (e.g gloves, masks, gowns) Hand washing stations with soap and water Alcohol based hand sanitizer Disinfectants for surface cleaning	1	1	1	1	1
2025-07-09 02:07:16	2025-07-09 02:08:23	27	Female	Bachelor's degree	Medical laboratory scientist	Less than 5 years	Laboratory Services	Yes	Social media	Not familiar at all	Fever Rash Headache Skin lesions	1	1	1	0	0	0	1	0	Contact with infected animals Direct contact with skin lesions of an infected person	1	1	0	0	0	0	Yes			Very concerned	No	Strongly agree	No		Not confident at all	Not sure	Isolation of infected patients Use of personal protective equipment Disinfection of contaminated surfaces	1	1	1	0	0	0	Personal Protective Equipment (e.g gloves, masks, gowns) Hand washing stations with soap and water Alcohol based hand sanitizer Disinfectants for surface cleaning	0	1	1	1	1
2025-07-09 02:08:23	2025-07-09 02:09:42	31	Female	Bachelor's degree	Medical laboratory scientist	5-10 years	Laboratory Services	Yes	Colleagues/workplace	Somewhat familiar	Fever Headache Difficulty breathing	1	0	1	0	0	1	0	0	Contact with infected animals Direct contact with skin lesions of an infected person Respiratory droplets Sexual contact Touching contaminated objects or surfaces	1	1	1	1	1	0	Yes			Moderately concerned	No	Strongly agree	No		Somewhat confident	No	Isolation of infected patients Use of personal protective equipment Disinfection of contaminated surfaces Quarantine of suspected cases Vaccination	1	1	1	1	1	0	Isolation wards/rooms Personal Protective Equipment (e.g gloves, masks, gowns) Hand washing stations with soap and water Alcohol based hand sanitizer Disinfectants for surface cleaning	1	1	1	1	1
2025-07-09 02:09:42	2025-07-09 02:11:11	26	Female	Bachelor's degree	Medical laboratory scientist	Less than 5 years	Laboratory Services	Yes	Colleagues/workplace	Somewhat familiar	Fever Rash Headache Swollen lymph nodes Skin lesions	1	1	1	0	1	0	1	0	Contact with infected animals Direct contact with skin lesions of an infected person Touching contaminated objects or surfaces	1	1	0	0	1	0	Yes			Very concerned	Not sure	Strongly agree	Yes	Online training	Not confident at all	Not sure	Isolation of infected patients Use of personal protective equipment Disinfection of contaminated surfaces Quarantine of suspected cases Vaccination	1	1	1	1	1	0	Isolation wards/rooms Personal Protective Equipment (e.g gloves, masks, gowns) Hand washing stations with soap and water Alcohol based hand sanitizer Disinfectants for surface cleaning Laboratory facilities for diagnostic testing Rapid response team or taskforce for outbreak management Communication and reporting tools (e.g., phones, computer, internet access) Standard treatment guidelines or pro…	1	1	1	1	1
2025-07-09 02:11:11	2025-07-09 02:12:32	24	Male	Bachelor's degree	Medical laboratory scientist	Less than 5 years	Laboratory Services	Yes	Scientific journals	Somewhat familiar	Fever Rash Skin lesions	1	1	0	0	0	0	1	0	Contact with infected animals Direct contact with skin lesions of an infected person	1	1	0	0	0	0	Not sure			Moderately concerned	No	Strongly agree	No		Not confident at all	Not sure	Isolation of infected patients Use of personal protective equipment Quarantine of suspected cases Vaccination	1	1	0	1	1	0	Isolation wards/rooms Personal Protective Equipment (e.g gloves, masks, gowns) Alcohol based hand sanitizer Laboratory facilities for diagnostic testing	1	1	0	1	0
2025-07-09 02:12:32	2025-07-09 02:14:00		Male	Bachelor's degree	Medical laboratory scientist	Less than 5 years	Laboratory Services	Yes	Scientific journals	Not familiar at all	Fever Rash Swollen lymph nodes Skin lesions	1	1	0	0	1	0	1	0	Contact with infected animals Direct contact with skin lesions of an infected person	1	1	0	0	0	0	No			Not concerned at all	No	Strongly agree	No		Somewhat confident	Not sure	Isolation of infected patients Use of personal protective equipment Disinfection of contaminated surfaces Quarantine of suspected cases	1	1	1	1	0	0	Isolation wards/rooms Personal Protective Equipment (e.g gloves, masks, gowns) Hand washing stations with soap and water Alcohol based hand sanitizer Disinfectants for surface cleaning Rapid response team or taskforce for outbreak management Communication and reporting tools (e.g., phones, computer, internet access) Adequate waste disposal system for medical waste Ambulance services for patient t…	1	1	1	1	1
2025-07-09 02:14:00	2025-07-09 02:15:46	26	Female	Bachelor's degree	Medical laboratory scientist	Less than 5 years	Laboratory Services	Yes	Social media	Somewhat familiar	Fever Rash Headache Muscle aches Skin lesions	1	1	1	1	0	0	1	0	Contact with infected animals Direct contact with skin lesions of an infected person Respiratory droplets Touching contaminated objects or surfaces	1	1	1	0	1	0	Yes			Very concerned	No	Strongly agree	No		Somewhat confident	Yes	Isolation of infected patients Use of personal protective equipment Disinfection of contaminated surfaces Quarantine of suspected cases Vaccination	1	1	1	1	1	0	Isolation wards/rooms Personal Protective Equipment (e.g gloves, masks, gowns) Hand washing stations with soap and water Alcohol based hand sanitizer Disinfectants for surface cleaning Standard treatment guidelines or protocol for mpox Training programs for health workers on mpox management Adequate waste disposal system for medical waste Ambulance services for patient transfer Adequate electrici…	1	1	1	1	1
2025-07-09 02:15:46	2025-07-09 02:17:16	26	Male	Bachelor's degree	Medical laboratory scientist	Less than 5 years	Laboratory Services	Yes	Others	Very familiar	Fever Rash Headache Muscle aches Swollen lymph nodes Difficulty breathing Skin lesions	1	1	1	1	1	1	1	0	Direct contact with skin lesions of an infected person	0	1	0	0	0	0	Yes			Very concerned	No	Strongly agree	No		Somewhat confident	No	Isolation of infected patients Use of personal protective equipment Disinfection of contaminated surfaces Quarantine of suspected cases Vaccination	1	1	1	1	1	0	Personal Protective Equipment (e.g gloves, masks, gowns) Hand washing stations with soap and water Alcohol based hand sanitizer Disinfectants for surface cleaning	0	1	1	1	1
2025-07-09 02:17:16	2025-07-09 02:18:59	26	Female	Bachelor's degree	Medical laboratory scientist	Less than 5 years	Laboratory Services	Yes	Social media	Somewhat familiar	Fever Rash Headache Swollen lymph nodes	1	1	1	0	1	0	0	0	Contact with infected animals Direct contact with skin lesions of an infected person Sexual contact	1	1	0	1	0	0	Yes			Very concerned	No	Strongly agree	No		Somewhat confident	No	Isolation of infected patients Use of personal protective equipment Disinfection of contaminated surfaces Quarantine of suspected cases Vaccination	1	1	1	1	1	0	Isolation wards/rooms Personal Protective Equipment (e.g gloves, masks, gowns) Hand washing stations with soap and water Alcohol based hand sanitizer Disinfectants for surface cleaning Laboratory facilities for diagnostic testing Communication and reporting tools (e.g., phones, computer, internet access) Training programs for health workers on mpox management Adequate waste disposal system for me…	1	1	1	1	1
2025-07-09 02:18:59	2025-07-09 02:20:22	38	Female	Bachelor's degree	Medical laboratory scientist	5-10 years	Laboratory Services	Yes	Colleagues/workplace	Somewhat familiar	Fever Rash Swollen lymph nodes	1	1	0	0	1	0	0	0	Contact with infected animals	1	0	0	0	0	0	Yes			Very concerned	Not sure	Agree	No		Not confident at all	Not sure	I am not familiar with any preventive measures	0	0	0	0	0	1	Hand washing stations with soap and water Alcohol based hand sanitizer	0	0	1	1	0
2025-07-09 02:20:22	2025-07-09 02:22:14	40	Male	Bachelor's degree	Medical laboratory scientist	5-10 years	Laboratory Services	Yes	Social media	Somewhat familiar	Fever Rash Headache Muscle aches Skin lesions	1	1	1	1	0	0	1	0	Contact with infected animals Direct contact with skin lesions of an infected person	1	1	0	0	0	0	No			Not concerned at all	No	Agree	No		Very confident	No	Isolation of infected patients Use of personal protective equipment Disinfection of contaminated surfaces Vaccination	1	1	1	0	1	0	Isolation wards/rooms Hand washing stations with soap and water Alcohol based hand sanitizer Stock of antiviral medications for mpox treatment Rapid response team or taskforce for outbreak management Training programs for health workers on mpox management Ambulance services for patient transfer Community awareness and education materials on mpox prevention Emergency funds or budget allocation for…	1	0	1	1	0
2025-07-09 02:22:14	2025-07-09 02:23:52	25	Female	Bachelor's degree	Medical laboratory scientist	Less than 5 years	Laboratory Services	Yes	Others	Somewhat familiar	Fever Rash Headache Muscle aches Skin lesions	1	1	1	1	0	0	1	0	Contact with infected animals Direct contact with skin lesions of an infected person	1	1	0	0	0	0	Yes			Moderately concerned	No	Strongly agree	No		Somewhat confident	No	Isolation of infected patients Use of personal protective equipment Disinfection of contaminated surfaces Quarantine of suspected cases Vaccination	1	1	1	1	1	0	Personal Protective Equipment (e.g gloves, masks, gowns) Hand washing stations with soap and water Alcohol based hand sanitizer Disinfectants for surface cleaning Ambulance services for patient transfer	0	1	1	1	1
2025-07-09 02:23:52	2025-07-09 02:25:26	24	Female	Bachelor's degree	Nurses	Less than 5 years	Emergency Care	Yes	Colleagues/workplace	Somewhat familiar	Fever Rash Muscle aches Swollen lymph nodes Skin lesions	1	1	0	1	1	0	1	0	Direct contact with skin lesions of an infected person Touching contaminated objects or surfaces	0	1	0	0	1	0	Yes			Very concerned	No	Strongly agree	No		Somewhat confident	No	Isolation of infected patients	1	0	0	0	0	0	Isolation wards/rooms Personal Protective Equipment (e.g gloves, masks, gowns) Hand washing stations with soap and water Alcohol based hand sanitizer Disinfectants for surface cleaning Communication and reporting tools (e.g., phones, computer, internet access) Adequate waste disposal system for medical waste Ambulance services for patient transfer Adequate electricity supply and backup generators	1	1	1	1	1
2025-07-09 02:25:26	2025-07-09 02:26:46		Female	Bachelor's degree	Medical laboratory scientist	Less than 5 years	Laboratory Services	Yes	Scientific journals	Somewhat familiar	Fever Rash Headache Muscle aches Swollen lymph nodes	1	1	1	1	1	0	0	0	Contact with infected animals Respiratory droplets Sexual contact	1	0	1	1	0	0	Yes			Moderately concerned	No	Strongly agree	No		Somewhat confident	No	Use of personal protective equipment Disinfection of contaminated surfaces Vaccination	0	1	1	0	1	0	Personal Protective Equipment (e.g gloves, masks, gowns) Hand washing stations with soap and water Disinfectants for surface cleaning Adequate waste disposal system for medical waste Ambulance services for patient transfer	0	1	1	0	1
2025-07-09 02:26:46	2025-07-09 02:28:05	16		Bachelor's degree	Nurses	Less than 5 years	Pediatrics	Yes	Colleagues/workplace	Not familiar at all	Rash	0	1	0	0	0	0	0	0	I don't know	0	0	0	0	0	1	Yes		Yes	Moderately concerned	No	Strongly agree	No		Not confident at all	Not sure	Isolation of infected patients	1	0	0	0	0	0	Isolation wards/rooms Personal Protective Equipment (e.g gloves, masks, gowns) Hand washing stations with soap and water Alcohol based hand sanitizer Laboratory facilities for diagnostic testing Adequate waste disposal system for medical waste Ambulance services for patient transfer Adequate electricity supply and backup generators Cold chain storage for vaccines or laboratory specimens	1	1	1	1	0
2025-07-09 02:28:05	2025-07-09 02:30:23	25	Female	Bachelor's degree	Doctor	Less than 5 years	Others	Yes	TV/Radio	Somewhat familiar	Fever Rash Swollen lymph nodes Skin lesions	1	1	0	0	1	0	1	0	Contact with infected animals Direct contact with skin lesions of an infected person Respiratory droplets	1	1	1	0	0	0	Yes			Very concerned	No	Strongly agree	No		Somewhat confident	No	Isolation of infected patients Use of personal protective equipment Disinfection of contaminated surfaces Quarantine of suspected cases Vaccination	1	1	1	1	1	0	Isolation wards/rooms Personal Protective Equipment (e.g gloves, masks, gowns) Hand washing stations with soap and water Alcohol based hand sanitizer Disinfectants for surface cleaning Communication and reporting tools (e.g., phones, computer, internet access) Adequate waste disposal system for medical waste Adequate electricity supply and backup generators	1	1	1	1	1
2025-07-09 02:30:24	2025-07-09 02:32:49	28	Female	Bachelor's degree	Doctor	Less than 5 years	Others	Yes	Social media	Somewhat familiar	Fever Rash Swollen lymph nodes Skin lesions	1	1	0	0	1	0	1	0	Contact with infected animals Direct contact with skin lesions of an infected person Respiratory droplets Sexual contact Touching contaminated objects or surfaces	1	1	1	1	1	0	Not sure			Moderately concerned	No	Strongly agree	No		Somewhat confident	No	Isolation of infected patients Use of personal protective equipment Disinfection of contaminated surfaces Quarantine of suspected cases Vaccination	1	1	1	1	1	0	Isolation wards/rooms Personal Protective Equipment (e.g gloves, masks, gowns) Hand washing stations with soap and water Alcohol based hand sanitizer Disinfectants for surface cleaning	1	1	1	1	1
2025-07-09 02:32:49	2025-07-09 10:43:52	30	Male	Bachelor's degree	Doctor	Less than 5 years	Others	Yes	Social media	Somewhat familiar	Fever Rash Headache Muscle aches Swollen lymph nodes Skin lesions	1	1	1	1	1	0	1	0	Contact with infected animals Direct contact with skin lesions of an infected person Respiratory droplets Touching contaminated objects or surfaces	1	1	1	0	1	0	Yes			Moderately concerned	No	Strongly agree	No		Somewhat confident	Not sure	Isolation of infected patients Use of personal protective equipment Disinfection of contaminated surfaces Quarantine of suspected cases Vaccination	1	1	1	1	1	0	Isolation wards/rooms Personal Protective Equipment (e.g gloves, masks, gowns) Hand washing stations with soap and water Alcohol based hand sanitizer Disinfectants for surface cleaning Laboratory facilities for diagnostic testing Rapid response team or taskforce for outbreak management Communication and reporting tools (e.g., phones, computer, internet access) Adequate waste disposal system for m…	1	1	1	1	1
2025-07-09 10:43:52	2025-07-09 10:45:39	35	Male	Bachelor's degree	Doctor	5-10 years	Others	Yes	Social media	Not familiar at all	Fever Rash Skin lesions	1	1	0	0	0	0	1	0	Contact with infected animals	1	0	0	0	0	0	Not sure			Moderately concerned	No	Strongly agree	No		Not confident at all	No	Isolation of infected patients Use of personal protective equipment Disinfection of contaminated surfaces Vaccination	1	1	1	0	1	0	Isolation wards/rooms Personal Protective Equipment (e.g gloves, masks, gowns) Hand washing stations with soap and water Alcohol based hand sanitizer Disinfectants for surface cleaning Communication and reporting tools (e.g., phones, computer, internet access) Adequate waste disposal system for medical waste Ambulance services for patient transfer Adequate electricity supply and backup generators…	1	1	1	1	1
2025-07-09 10:45:39	2025-07-09 10:47:33	38	Female	Bachelor's degree	Nurses	11-15 years	Others	Yes	TV/Radio	Very familiar	Rash	0	1	0	0	0	0	0	0	Respiratory droplets	0	0	1	0	0	0	Yes			Very concerned	No	Strongly agree	No		Somewhat confident	No	Use of personal protective equipment	0	1	0	0	0	0	Personal Protective Equipment (e.g gloves, masks, gowns) Hand washing stations with soap and water Alcohol based hand sanitizer Disinfectants for surface cleaning Adequate waste disposal system for medical waste Ambulance services for patient transfer	0	1	1	1	1
2025-07-09 10:47:33	2025-07-09 10:48:58	36		Bachelor's degree	Nurses	5-10 years	Others	Yes	Social media	Not familiar at all	Fever	1	0	0	0	0	0	0	0	Respiratory droplets	0	0	1	0	0	0	Not sure			Very concerned	Not sure	Agree	Yes	Online training	Not confident at all	No	Isolation of infected patients	1	0	0	0	0	0	Alcohol based hand sanitizer	0	0	0	1	0
2025-07-09 10:48:58	2025-07-09 10:52:29	50	Female	Bachelor's degree	Nurses	More than 15 years	Others	Yes	Social media	Not familiar at all	Fever	1	0	0	0	0	0	0	0	I don't know	0	0	0	0	0	1	Not sure			Very concerned	Not sure	Strongly agree	No		Not confident at all	No	I am not familiar with any preventive measures	0	0	0	0	0	1
2025-07-09 10:52:29	2025-07-09 10:53:50	31	Male	Bachelor's degree	Nurses	Less than 5 years	Emergency Care	Yes	Social media	Very familiar	Fever Rash Headache Muscle aches Swollen lymph nodes Difficulty breathing Skin lesions	1	1	1	1	1	1	1	0	Contact with infected animals Direct contact with skin lesions of an infected person Respiratory droplets Sexual contact Touching contaminated objects or surfaces	1	1	1	1	1	0	Yes			Very concerned	No	Strongly agree	No		Not confident at all	Not sure	Isolation of infected patients Use of personal protective equipment Disinfection of contaminated surfaces Quarantine of suspected cases Vaccination	1	1	1	1	1	0	Isolation wards/rooms Personal Protective Equipment (e.g gloves, masks, gowns) Hand washing stations with soap and water Alcohol based hand sanitizer Disinfectants for surface cleaning Laboratory facilities for diagnostic testing Mpox-specific diagnostic kits Vaccine for mpox prevention Stock of antiviral medications for mpox treatment Rapid response team or taskforce for outbreak management Comm…	1	1	1	1	1
2025-07-09 10:53:50	2025-07-09 10:55:06	44	Male	Bachelor's degree	Medical laboratory scientist	11-15 years	Laboratory Services	Yes	Social media	Somewhat familiar	Fever Rash Headache Muscle aches Swollen lymph nodes Difficulty breathing Skin lesions	1	1	1	1	1	1	1	0	Contact with infected animals Direct contact with skin lesions of an infected person Respiratory droplets Sexual contact Touching contaminated objects or surfaces	1	1	1	1	1	0	Yes			Very concerned	No	Agree	No		Not confident at all	Not sure	Isolation of infected patients Use of personal protective equipment Disinfection of contaminated surfaces Quarantine of suspected cases	1	1	1	1	0	0	Personal Protective Equipment (e.g gloves, masks, gowns) Hand washing stations with soap and water Alcohol based hand sanitizer Disinfectants for surface cleaning Rapid response team or taskforce for outbreak management Communication and reporting tools (e.g., phones, computer, internet access)	0	1	1	1	1
2025-07-09 10:55:06	2025-07-09 10:56:36	39	Male	Bachelor's degree	Medical laboratory scientist	11-15 years	Laboratory Services	Yes	Colleagues/workplace	Somewhat familiar	Fever Rash Headache Muscle aches Swollen lymph nodes Difficulty breathing	1	1	1	1	1	1	0	0	Contact with infected animals Direct contact with skin lesions of an infected person Respiratory droplets Sexual contact Touching contaminated objects or surfaces	1	1	1	1	1	0	Yes			Very concerned	No	Agree	No		Not confident at all	No	Isolation of infected patients Use of personal protective equipment Disinfection of contaminated surfaces Quarantine of suspected cases Vaccination	1	1	1	1	1	0	Personal Protective Equipment (e.g gloves, masks, gowns) Hand washing stations with soap and water Alcohol based hand sanitizer Disinfectants for surface cleaning Laboratory facilities for diagnostic testing Adequate waste disposal system for medical waste Ambulance services for patient transfer Adequate electricity supply and backup generators Cold chain storage for vaccines or laboratory specim…	0	1	1	1	1
2025-07-09 10:56:36	2025-07-09 10:57:46	53	Female	Postgraduate degree	Medical laboratory scientist	11-15 years	Laboratory Services	Yes	Social media	Not familiar at all	Rash	0	1	0	0	0	0	0	0	Contact with infected animals	1	0	0	0	0	0	Not sure			Moderately concerned	No	Strongly agree	No		Not confident at all	No	Isolation of infected patients	1	0	0	0	0	0	Isolation wards/rooms	1	0	0	0	0
2025-07-09 10:57:46	2025-07-09 10:59:14	26	Female	Bachelor's degree	Nurses	Less than 5 years	Others	Yes	Social media	Somewhat familiar	Fever Rash Headache Muscle aches Swollen lymph nodes	1	1	1	1	1	0	0	0	Contact with infected animals Direct contact with skin lesions of an infected person Touching contaminated objects or surfaces	1	1	0	0	1	0	Yes			Very concerned	No	Strongly agree	No		Not confident at all	Yes	Isolation of infected patients Use of personal protective equipment Disinfection of contaminated surfaces Quarantine of suspected cases	1	1	1	1	0	0	Isolation wards/rooms Personal Protective Equipment (e.g gloves, masks, gowns) Hand washing stations with soap and water Alcohol based hand sanitizer Disinfectants for surface cleaning Stock of antiviral medications for mpox treatment Communication and reporting tools (e.g., phones, computer, internet access) Adequate waste disposal system for medical waste Ambulance services for patient transfer…	1	1	1	1	1
2025-07-09 10:59:14	2025-07-09 11:00:41	32	Female	Bachelor's degree	Nurses	Less than 5 years	Others	Yes	Others	Not familiar at all	Fever Rash Muscle aches Swollen lymph nodes Skin lesions	1	1	0	1	1	0	1	0	Contact with infected animals Direct contact with skin lesions of an infected person Respiratory droplets Sexual contact Touching contaminated objects or surfaces	1	1	1	1	1	0	Yes			Very concerned	No	Strongly agree			Not confident at all	Not sure	Isolation of infected patients Use of personal protective equipment Disinfection of contaminated surfaces Quarantine of suspected cases	1	1	1	1	0	0	Isolation wards/rooms Personal Protective Equipment (e.g gloves, masks, gowns) Hand washing stations with soap and water Alcohol based hand sanitizer Disinfectants for surface cleaning Laboratory facilities for diagnostic testing Mpox-specific diagnostic kits Adequate waste disposal system for medical waste Ambulance services for patient transfer Adequate electricity supply and backup generators …	1	1	1	1	1
2025-07-09 11:00:41	2025-07-09 11:02:19	34	Female	Bachelor's degree	Doctor	5-10 years	Pediatrics	Yes	Colleagues/workplace	Somewhat familiar	Fever Headache Muscle aches Swollen lymph nodes Skin lesions	1	0	1	1	1	0	1	0	Contact with infected animals Respiratory droplets Sexual contact Touching contaminated objects or surfaces	1	0	1	1	1	0	Yes			Very concerned	Not sure	Strongly agree	No		Not confident at all	No	Isolation of infected patients Use of personal protective equipment Disinfection of contaminated surfaces Quarantine of suspected cases Vaccination	1	1	1	1	1	0	Hand washing stations with soap and water Alcohol based hand sanitizer Disinfectants for surface cleaning Adequate waste disposal system for medical waste Adequate electricity supply and backup generators	0	0	1	1	1
2025-07-09 11:02:19	2025-07-09 11:03:25	27	Female	Bachelor's degree	Medical laboratory scientist	Less than 5 years	Laboratory Services	Yes	Scientific journals	Somewhat familiar	Fever	1	0	0	0	0	0	0	0	Direct contact with skin lesions of an infected person	0	1	0	0	0	0	Yes			Moderately concerned	No	Agree	No		Somewhat confident	Not sure	Quarantine of suspected cases	0	0	0	1	0	0	Isolation wards/rooms	1	0	0	0	0
2025-07-09 11:03:25	2025-07-09 11:05:21		Male	Bachelor's degree	Nurses	11-15 years	Others	Yes	Colleagues/workplace	Very familiar	Fever Rash Headache Muscle aches Swollen lymph nodes Difficulty breathing Skin lesions	1	1	1	1	1	1	1	0	Contact with infected animals Direct contact with skin lesions of an infected person Respiratory droplets Sexual contact Touching contaminated objects or surfaces	1	1	1	1	1	0	Yes			Very concerned	No	Strongly agree	No		Somewhat confident	Not sure	Use of personal protective equipment	0	1	0	0	0	0	Isolation wards/rooms Personal Protective Equipment (e.g gloves, masks, gowns) Hand washing stations with soap and water Alcohol based hand sanitizer Disinfectants for surface cleaning Rapid response team or taskforce for outbreak management Adequate waste disposal system for medical waste Ambulance services for patient transfer Adequate electricity supply and backup generators	1	1	1	1	1
2025-07-09 11:05:21	2025-07-09 11:07:01	25	Female	Bachelor's degree	Nurses	Less than 5 years	Others	Yes	Social media	Somewhat familiar	Fever Rash Headache Difficulty breathing Skin lesions	1	1	1	0	0	1	1	0	Contact with infected animals Direct contact with skin lesions of an infected person Respiratory droplets Touching contaminated objects or surfaces	1	1	1	0	1	0	Yes			Very concerned	Not sure	Strongly agree	Not sure		Not confident at all	Yes	Isolation of infected patients Use of personal protective equipment Disinfection of contaminated surfaces Quarantine of suspected cases Vaccination	1	1	1	1	1	0	Isolation wards/rooms Personal Protective Equipment (e.g gloves, masks, gowns) Hand washing stations with soap and water Alcohol based hand sanitizer Disinfectants for surface cleaning Laboratory facilities for diagnostic testing Vaccine for mpox prevention Rapid response team or taskforce for outbreak management Communication and reporting tools (e.g., phones, computer, internet access) Standard…	1	1	1	1	1
2025-07-09 11:07:01	2025-07-09 11:12:48	32	Female	Bachelor's degree	Doctor	5-10 years	Emergency Care	Yes	Colleagues/workplace	Somewhat familiar	Fever Rash Headache Muscle aches Skin lesions	1	1	1	1	0	0	1	0	Contact with infected animals Direct contact with skin lesions of an infected person Respiratory droplets Touching contaminated objects or surfaces	1	1	1	0	1	0	Yes			Very concerned	No	Strongly agree	No		Somewhat confident	No	Isolation of infected patients Use of personal protective equipment Disinfection of contaminated surfaces Quarantine of suspected cases Vaccination	1	1	1	1	1	0	Hand washing stations with soap and water Alcohol based hand sanitizer Disinfectants for surface cleaning Communication and reporting tools (e.g., phones, computer, internet access) Adequate waste disposal system for medical waste Ambulance services for patient transfer Adequate electricity supply and backup generators	0	0	1	1	1
2025-07-09 11:12:48	2025-07-09 11:14:22	28	Female	Bachelor's degree	Nurses	Less than 5 years	Others	Yes	Colleagues/workplace	Somewhat familiar	Fever Headache Swollen lymph nodes Difficulty breathing Skin lesions	1	0	1	0	1	1	1	0	Contact with infected animals Direct contact with skin lesions of an infected person Respiratory droplets Touching contaminated objects or surfaces	1	1	1	0	1	0	Yes			Very concerned	Not sure	Strongly agree	Not sure		Somewhat confident	Yes	Isolation of infected patients Use of personal protective equipment Disinfection of contaminated surfaces Quarantine of suspected cases Vaccination	1	1	1	1	1	0	Isolation wards/rooms Personal Protective Equipment (e.g gloves, masks, gowns) Hand washing stations with soap and water Alcohol based hand sanitizer Disinfectants for surface cleaning Laboratory facilities for diagnostic testing Vaccine for mpox prevention Rapid response team or taskforce for outbreak management Communication and reporting tools (e.g., phones, computer, internet access) Standard…	1	1	1	1	1
2025-07-09 11:14:22	2025-07-09 11:17:15	32	Male	Bachelor's degree	Nurses	Less than 5 years	Others	Yes	Colleagues/workplace	Somewhat familiar	Fever Headache Swollen lymph nodes Difficulty breathing Skin lesions	1	0	1	0	1	1	1	0	Contact with infected animals Direct contact with skin lesions of an infected person Respiratory droplets Touching contaminated objects or surfaces	1	1	1	0	1	0	Yes			Very concerned	Not sure	Strongly agree	Not sure		Somewhat confident	Yes	Isolation of infected patients Use of personal protective equipment Disinfection of contaminated surfaces Quarantine of suspected cases Vaccination	1	1	1	1	1	0	Isolation wards/rooms Personal Protective Equipment (e.g gloves, masks, gowns) Hand washing stations with soap and water Alcohol based hand sanitizer Disinfectants for surface cleaning Laboratory facilities for diagnostic testing Vaccine for mpox prevention Rapid response team or taskforce for outbreak management Communication and reporting tools (e.g., phones, computer, internet access) Standard…	1	1	1	1	1
2025-07-09 11:17:15	2025-07-09 11:20:01	30	Male	Bachelor's degree	Pharmacist	Less than 5 years	Others	Yes	Social media	Very familiar	Fever Rash Headache Muscle aches Swollen lymph nodes Skin lesions	1	1	1	1	1	0	1	0	Contact with infected animals Direct contact with skin lesions of an infected person Respiratory droplets Sexual contact Touching contaminated objects or surfaces	1	1	1	1	1	0	Yes			Very concerned	Yes	Strongly agree	Not sure		Somewhat confident	Not sure	Isolation of infected patients Use of personal protective equipment Disinfection of contaminated surfaces Quarantine of suspected cases Vaccination	1	1	1	1	1	0	Isolation wards/rooms Hand washing stations with soap and water Alcohol based hand sanitizer Disinfectants for surface cleaning Stock of antiviral medications for mpox treatment Communication and reporting tools (e.g., phones, computer, internet access) Adequate waste disposal system for medical waste Ambulance services for patient transfer Adequate electricity supply and backup generators Cold c…	1	0	1	1	1
2025-07-09 11:20:01	2025-07-09 11:22:04	25	Female	Bachelor's degree	Nurses	Less than 5 years	Others	Yes	Colleagues/workplace	Very familiar	Fever Rash Swollen lymph nodes	1	1	0	0	1	0	0	0	Direct contact with skin lesions of an infected person	0	1	0	0	0	0	Yes			Very concerned	No	Agree	No		Somewhat confident	No	Isolation of infected patients Use of personal protective equipment Disinfection of contaminated surfaces Quarantine of suspected cases Vaccination	1	1	1	1	1	0	Isolation wards/rooms Personal Protective Equipment (e.g gloves, masks, gowns) Hand washing stations with soap and water Alcohol based hand sanitizer Disinfectants for surface cleaning Laboratory facilities for diagnostic testing Communication and reporting tools (e.g., phones, computer, internet access) Adequate waste disposal system for medical waste Ambulance services for patient transfer Adeq…	1	1	1	1	1
2025-07-09 11:22:04	2025-07-09 11:24:33	24	Female	Bachelor's degree	Nurses	Less than 5 years	Emergency Care	Yes			Fever Rash Swollen lymph nodes Skin lesions	1	1	0	0	1	0	1	0	Contact with infected animals Direct contact with skin lesions of an infected person Respiratory droplets Sexual contact	1	1	1	1	0	0	Yes			Very concerned	Yes	Strongly agree	Not sure		Somewhat confident	Not sure	Isolation of infected patients Use of personal protective equipment Disinfection of contaminated surfaces Quarantine of suspected cases Vaccination	1	1	1	1	1	0	Isolation wards/rooms Personal Protective Equipment (e.g gloves, masks, gowns) Hand washing stations with soap and water Alcohol based hand sanitizer Disinfectants for surface cleaning Laboratory facilities for diagnostic testing Mpox-specific diagnostic kits Stock of antiviral medications for mpox treatment Rapid response team or taskforce for outbreak management Communication and reporting tool…	1	1	1	1	1
2025-07-09 11:24:34	2025-07-09 11:26:09	25	Female	Bachelor's degree	Nurses	5-10 years	Others	Yes	Social media	Somewhat familiar	Skin lesions	0	0	0	0	0	0	1	0	Direct contact with skin lesions of an infected person	0	1	0	0	0	0	Yes			Very concerned	No	Strongly agree	No		Somewhat confident	Not sure	Quarantine of suspected cases	0	0	0	1	0	0	Hand washing stations with soap and water Alcohol based hand sanitizer Disinfectants for surface cleaning Standard treatment guidelines or protocol for mpox	0	0	1	1	1
2025-07-09 11:26:09	2025-07-09 11:27:53	43	Female	Bachelor's degree	Nurses	More than 15 years	Others	Yes	TV/Radio	Somewhat familiar	Rash Muscle aches Swollen lymph nodes	0	1	0	1	1	0	0	0	Contact with infected animals Direct contact with skin lesions of an infected person Touching contaminated objects or surfaces	1	1	0	0	1	0	Yes			Very concerned	Not sure	Strongly agree	No		Somewhat confident	No	Use of personal protective equipment	0	1	0	0	0	0	Isolation wards/rooms Personal Protective Equipment (e.g gloves, masks, gowns) Hand washing stations with soap and water Alcohol based hand sanitizer Disinfectants for surface cleaning Ambulance services for patient transfer Community awareness and education materials on mpox prevention	1	1	1	1	1
2025-07-09 11:27:53	2025-07-09 11:29:33	30	Female	Diploma/Certificate	Nurses	5-10 years	Others	Yes	Others	Very familiar	Fever Rash Headache Muscle aches Swollen lymph nodes Skin lesions	1	1	1	1	1	0	1	0	Contact with infected animals Direct contact with skin lesions of an infected person Touching contaminated objects or surfaces	1	1	0	0	1	0	Yes			Very concerned	No	Strongly agree	No		Somewhat confident	Not sure	Isolation of infected patients Use of personal protective equipment Disinfection of contaminated surfaces Quarantine of suspected cases Vaccination	1	1	1	1	1	0	Isolation wards/rooms Personal Protective Equipment (e.g gloves, masks, gowns) Hand washing stations with soap and water Alcohol based hand sanitizer Disinfectants for surface cleaning Communication and reporting tools (e.g., phones, computer, internet access) Adequate waste disposal system for medical waste Ambulance services for patient transfer Adequate electricity supply and backup generators	1	1	1	1	1
2025-07-09 11:29:33	2025-07-09 11:30:54	52	Female	Bachelor's degree	Nurses	More than 15 years	Others	Yes	Colleagues/workplace	Somewhat familiar	Fever Rash Headache Swollen lymph nodes Skin lesions	1	1	1	0	1	0	1	0	Contact with infected animals Direct contact with skin lesions of an infected person Respiratory droplets Touching contaminated objects or surfaces	1	1	1	0	1	0	Yes			Moderately concerned	No	Strongly agree	No		Somewhat confident	Yes	Isolation of infected patients Use of personal protective equipment Disinfection of contaminated surfaces	1	1	1	0	0	0	Personal Protective Equipment (e.g gloves, masks, gowns) Hand washing stations with soap and water Alcohol based hand sanitizer Disinfectants for surface cleaning Laboratory facilities for diagnostic testing Adequate waste disposal system for medical waste Ambulance services for patient transfer Adequate electricity supply and backup generators Cold chain storage for vaccines or laboratory specim…	0	1	1	1	1
2025-07-09 11:30:54	2025-07-09 11:34:21	26	Female	Bachelor's degree	Medical laboratory scientist	Less than 5 years	Laboratory Services	Yes	Colleagues/workplace	Somewhat familiar	Fever Headache Skin lesions	1	0	1	0	0	0	1	0	Direct contact with skin lesions of an infected person	0	1	0	0	0	0	Yes			Very concerned	No	Strongly agree	Not sure		Somewhat confident	Not sure	Isolation of infected patients Use of personal protective equipment Disinfection of contaminated surfaces Quarantine of suspected cases Vaccination	1	1	1	1	1	0	Personal Protective Equipment (e.g gloves, masks, gowns) Hand washing stations with soap and water Alcohol based hand sanitizer Disinfectants for surface cleaning	0	1	1	1	1
2025-07-09 11:34:21	2025-07-09 11:36:11	28	Male	Bachelor's degree	Medical laboratory scientist	Less than 5 years	Laboratory Services	Yes	Social media	Somewhat familiar	Fever Rash Muscle aches Swollen lymph nodes	1	1	0	1	1	0	0	0	Contact with infected animals Direct contact with skin lesions of an infected person Respiratory droplets Touching contaminated objects or surfaces	1	1	1	0	1	0	Yes			Moderately concerned	No	Strongly agree	No		Not confident at all	Yes	Isolation of infected patients Use of personal protective equipment Disinfection of contaminated surfaces Quarantine of suspected cases	1	1	1	1	0	0	Isolation wards/rooms Personal Protective Equipment (e.g gloves, masks, gowns) Hand washing stations with soap and water Alcohol based hand sanitizer Disinfectants for surface cleaning Laboratory facilities for diagnostic testing Communication and reporting tools (e.g., phones, computer, internet access) Adequate waste disposal system for medical waste Ambulance services for patient transfer Adeq…	1	1	1	1	1
2025-07-09 11:36:11	2025-07-09 11:37:49	24	Female	Bachelor's degree	Medical laboratory scientist	5-10 years	Laboratory Services	Yes	Others	Somewhat familiar	Fever Rash Headache Muscle aches Skin lesions	1	1	1	1	0	0	1	0	Contact with infected animals Direct contact with skin lesions of an infected person Touching contaminated objects or surfaces	1	1	0	0	1	0	Yes			Moderately concerned	No	Strongly agree	No		Somewhat confident	No	Isolation of infected patients Use of personal protective equipment Disinfection of contaminated surfaces Quarantine of suspected cases Vaccination	1	1	1	1	1	0	Personal Protective Equipment (e.g gloves, masks, gowns) Hand washing stations with soap and water Alcohol based hand sanitizer Disinfectants for surface cleaning Ambulance services for patient transfer	0	1	1	1	1
2025-07-09 11:37:49	2025-07-09 11:39:36	38	Female	Bachelor's degree	Nurses	5-10 years	Others	Yes	Social media	Somewhat familiar	Fever Rash Headache Swollen lymph nodes Difficulty breathing	1	1	1	0	1	1	0	0	Contact with infected animals Direct contact with skin lesions of an infected person Respiratory droplets	1	1	1	0	0	0	Yes			Very concerned	No	Strongly agree	No		Not confident at all	No	Isolation of infected patients Use of personal protective equipment Disinfection of contaminated surfaces Quarantine of suspected cases	1	1	1	1	0	0	Isolation wards/rooms Personal Protective Equipment (e.g gloves, masks, gowns) Hand washing stations with soap and water Alcohol based hand sanitizer Disinfectants for surface cleaning Laboratory facilities for diagnostic testing Stock of antiviral medications for mpox treatment Rapid response team or taskforce for outbreak management Communication and reporting tools (e.g., phones, computer, int…	1	1	1	1	1
2025-07-09 11:39:36	2025-07-09 11:42:54	48	Female	Postgraduate degree	Nurses	More than 15 years	Others	Yes	Social media	Not familiar at all	Fever Rash Headache Muscle aches Swollen lymph nodes Skin lesions	1	1	1	1	1	0	1	0	Contact with infected animals Direct contact with skin lesions of an infected person Sexual contact Touching contaminated objects or surfaces	1	1	0	1	1	0	Yes			Moderately concerned	No	Agree	No		Not confident at all	Not sure	Isolation of infected patients Use of personal protective equipment Disinfection of contaminated surfaces Quarantine of suspected cases Vaccination	1	1	1	1	1	0	Hand washing stations with soap and water Alcohol based hand sanitizer Disinfectants for surface cleaning Adequate waste disposal system for medical waste Ambulance services for patient transfer Adequate electricity supply and backup generators Cold chain storage for vaccines or laboratory specimens	0	0	1	1	1
2025-07-09 11:42:54	2025-07-09 11:45:27	32	Male	Bachelor's degree	Doctor	Less than 5 years	Others	Yes	Scientific journals	Somewhat familiar	Fever Rash Muscle aches Swollen lymph nodes	1	1	0	1	1	0	0	0	Contact with infected animals Direct contact with skin lesions of an infected person Sexual contact Touching contaminated objects or surfaces	1	1	0	1	1	0	Not sure			Very concerned	No	Strongly agree	No		Not confident at all	No	Isolation of infected patients Use of personal protective equipment Disinfection of contaminated surfaces Quarantine of suspected cases Vaccination	1	1	1	1	1	0	Personal Protective Equipment (e.g gloves, masks, gowns) Hand washing stations with soap and water Alcohol based hand sanitizer Adequate electricity supply and backup generators	0	1	1	1	0
2025-07-09 11:45:27	2025-07-09 11:47:14	32	Female	Bachelor's degree	Doctor	5-10 years	Others	Yes	Colleagues/workplace	Very familiar	Fever Rash Headache Muscle aches Skin lesions	1	1	1	1	0	0	1	0	Contact with infected animals Direct contact with skin lesions of an infected person Respiratory droplets Touching contaminated objects or surfaces	1	1	1	0	1	0	Yes			Very concerned	No	Strongly agree	No		Somewhat confident	No	Isolation of infected patients Use of personal protective equipment Disinfection of contaminated surfaces Quarantine of suspected cases Vaccination	1	1	1	1	1	0	Isolation wards/rooms Hand washing stations with soap and water Alcohol based hand sanitizer Communication and reporting tools (e.g., phones, computer, internet access) Adequate waste disposal system for medical waste Adequate electricity supply and backup generators Community awareness and education materials on mpox prevention	1	0	1	1	0
2025-07-09 11:47:14	2025-07-09 11:48:31	39	Male	Bachelor's degree		11-15 years	Others	Yes	Colleagues/workplace	Somewhat familiar	Fever Rash Skin lesions	1	1	0	0	0	0	1	0	Contact with infected animals Direct contact with skin lesions of an infected person Respiratory droplets	1	1	1	0	0	0	Yes			Moderately concerned	No	Agree	No		Not confident at all	No	Isolation of infected patients Use of personal protective equipment Disinfection of contaminated surfaces Vaccination	1	1	1	0	1	0
2025-07-09 11:48:31	2025-07-09 11:50:22	42	Female	Postgraduate degree	Doctor	11-15 years	Others	Yes	TV/Radio	Somewhat familiar	Fever Rash Headache Muscle aches Swollen lymph nodes Difficulty breathing Skin lesions	1	1	1	1	1	1	1	0	Direct contact with skin lesions of an infected person Touching contaminated objects or surfaces	0	1	0	0	1	0	Yes			Very concerned	No	Agree	No		Not confident at all	No	Isolation of infected patients Use of personal protective equipment Disinfection of contaminated surfaces Quarantine of suspected cases Vaccination	1	1	1	1	1	0	Personal Protective Equipment (e.g gloves, masks, gowns) Hand washing stations with soap and water Alcohol based hand sanitizer Disinfectants for surface cleaning	0	1	1	1	1
2025-07-09 11:50:22	2025-07-09 11:52:09	36	Male	Bachelor's degree	Doctor	Less than 5 years	Others	No		Very familiar	Fever Rash Headache Muscle aches Skin lesions	1	1	1	1	0	0	1	0	Contact with infected animals Direct contact with skin lesions of an infected person Respiratory droplets Sexual contact Touching contaminated objects or surfaces	1	1	1	1	1	0	Yes			Very concerned	No	Strongly agree	No		Somewhat confident	No	Isolation of infected patients Use of personal protective equipment Disinfection of contaminated surfaces Quarantine of suspected cases Vaccination	1	1	1	1	1	0	Isolation wards/rooms Personal Protective Equipment (e.g gloves, masks, gowns) Hand washing stations with soap and water Alcohol based hand sanitizer Disinfectants for surface cleaning	1	1	1	1	1
2025-07-09 11:52:09	2025-07-09 11:54:15	26	Female	Bachelor's degree	Medical laboratory scientist	Less than 5 years	Laboratory Services	Yes	Scientific journals	Very familiar	Rash Swollen lymph nodes Difficulty breathing Skin lesions	0	1	0	0	1	1	1	0	Contact with infected animals Direct contact with skin lesions of an infected person Respiratory droplets Sexual contact	1	1	1	1	0	0	Yes			Very concerned	No	Strongly agree	No		Somewhat confident	Yes	Isolation of infected patients Use of personal protective equipment Disinfection of contaminated surfaces Quarantine of suspected cases Vaccination	1	1	1	1	1	0	Isolation wards/rooms Personal Protective Equipment (e.g gloves, masks, gowns) Hand washing stations with soap and water Alcohol based hand sanitizer Disinfectants for surface cleaning Laboratory facilities for diagnostic testing Rapid response team or taskforce for outbreak management Communication and reporting tools (e.g., phones, computer, internet access) Standard treatment guidelines or pro…	1	1	1	1	1
2025-07-09 11:54:15	2025-07-09 11:55:52	35	Male	Postgraduate degree	Doctor	5-10 years	Others	Yes	TV/Radio	Not familiar at all	Skin lesions	0	0	0	0	0	0	1	0	Direct contact with skin lesions of an infected person	0	1	0	0	0	0				Moderately concerned	No	Strongly agree	Yes	In-person Training	Not confident at all	Not sure	Isolation of infected patients	1	0	0	0	0	0	Isolation wards/rooms	1	0	0	0	0
2025-07-09 11:55:52	2025-07-09 11:59:07	26	Male	Bachelor's degree	Doctor	Less than 5 years	Others	Yes	Social media	Somewhat familiar	Fever Swollen lymph nodes Skin lesions	1	0	0	0	1	0	1	0	Respiratory droplets	0	0	1	0	0	0	Yes			Moderately concerned	No	Strongly agree	No		Not confident at all	Not sure	Isolation of infected patients Use of personal protective equipment Disinfection of contaminated surfaces	1	1	1	0	0	0	Isolation wards/rooms Personal Protective Equipment (e.g gloves, masks, gowns) Hand washing stations with soap and water Alcohol based hand sanitizer Ambulance services for patient transfer	1	1	1	1	0
2025-07-09 11:59:07	2025-07-09 12:04:59	32	Male	Bachelor's degree	Medical laboratory scientist	5-10 years	Laboratory Services	Yes	TV/Radio	Somewhat familiar	Fever Rash Swollen lymph nodes	1	1	0	0	1	0	0	0	Contact with infected animals Direct contact with skin lesions of an infected person	1	1	0	0	0	0	Yes	More serious	Yes	Very concerned	No	Strongly agree	No		Somewhat confident	Yes	Isolation of infected patients Use of personal protective equipment Disinfection of contaminated surfaces	1	1	1	0	0	0	Isolation wards/rooms Personal Protective Equipment (e.g gloves, masks, gowns) Hand washing stations with soap and water Alcohol based hand sanitizer Disinfectants for surface cleaning Laboratory facilities for diagnostic testing Communication and reporting tools (e.g., phones, computer, internet access) Adequate waste disposal system for medical waste Ambulance services for patient transfer Adeq…	1	1	1	1	1
2025-07-09 12:04:59	2025-07-09 12:06:51		Male	Postgraduate degree	Medical laboratory scientist	5-10 years	Laboratory Services	Yes	Colleagues/workplace	Somewhat familiar	Fever Headache Muscle aches	1	0	1	1	0	0	0	0	Contact with infected animals Touching contaminated objects or surfaces	1	0	0	0	1	0	Yes	Equally serious	Yes	Very concerned	Not sure	Strongly agree	No		Not confident at all	No	Isolation of infected patients Use of personal protective equipment Disinfection of contaminated surfaces Quarantine of suspected cases Vaccination	1	1	1	1	1	0	Alcohol based hand sanitizer	0	0	0	1	0
2025-07-09 12:06:51	2025-07-09 12:09:53	27	Female	Bachelor's degree	Nurses	Less than 5 years	Others	Yes	Scientific journals	Not familiar at all	Fever Rash Swollen lymph nodes Skin lesions	1	1	0	0	1	0	1	0	Contact with infected animals Direct contact with skin lesions of an infected person	1	1	0	0	0	0	Yes	Equally serious	Yes	Very concerned	No	Strongly agree	No		Very confident	Yes	Isolation of infected patients Use of personal protective equipment Disinfection of contaminated surfaces Vaccination	1	1	1	0	1	0	Personal Protective Equipment (e.g gloves, masks, gowns) Hand washing stations with soap and water Alcohol based hand sanitizer Disinfectants for surface cleaning Laboratory facilities for diagnostic testing Vaccine for mpox prevention Ambulance services for patient transfer	0	1	1	1	1
2025-07-09 12:09:53	2025-07-09 12:11:34	37	Male	Postgraduate degree	Doctor	5-10 years	Others	Yes		Somewhat familiar	Fever Rash Headache Swollen lymph nodes Difficulty breathing	1	1	1	0	1	1	0	0	Direct contact with skin lesions of an infected person Respiratory droplets	0	1	1	0	0	0	Yes	Equally serious	Yes	Very concerned	No	Strongly agree	Not sure		Not confident at all	No	Isolation of infected patients Use of personal protective equipment Disinfection of contaminated surfaces	1	1	1	0	0	0	Personal Protective Equipment (e.g gloves, masks, gowns) Hand washing stations with soap and water Alcohol based hand sanitizer Disinfectants for surface cleaning	0	1	1	1	1
2025-07-09 12:11:34	2025-07-09 12:13:12	32	Female	Bachelor's degree	Doctor	Less than 5 years	Others	Yes	Colleagues/workplace	Somewhat familiar	Fever Rash Headache Swollen lymph nodes	1	1	1	0	1	0	0	0	Direct contact with skin lesions of an infected person Respiratory droplets	0	1	1	0	0	0	Yes		Yes	Very concerned	No	Strongly agree	No		Not confident at all	No	Isolation of infected patients Use of personal protective equipment	1	1	0	0	0	0	Alcohol based hand sanitizer	0	0	0	1	0
2025-07-09 12:13:12	2025-07-09 12:14:26	30	Male	Bachelor's degree	Doctor	5-10 years	Others	Yes	TV/Radio	Somewhat familiar	Rash	0	1	0	0	0	0	0	0	Direct contact with skin lesions of an infected person	0	1	0	0	0	0	Yes	Equally serious	Yes	Very concerned	No	Strongly agree	No		Very confident	No	Isolation of infected patients	1	0	0	0	0	0	Communication and reporting tools (e.g., phones, computer, internet access)	0	0	0	0	0
2025-07-09 12:14:26	2025-07-09 12:15:41		Female	Bachelor's degree	Doctor	Less than 5 years	Others	Yes	TV/Radio	Somewhat familiar	Fever Rash	1	1	0	0	0	0	0	0	I don't know	0	0	0	0	0	1	Yes	Less serious	Yes	Very concerned	No	Strongly agree	Not sure		Not confident at all	Not sure	Isolation of infected patients Quarantine of suspected cases	1	0	0	1	0	0	Personal Protective Equipment (e.g gloves, masks, gowns) Hand washing stations with soap and water	0	1	1	0	0
2025-07-09 12:15:41	2025-07-12 07:37:18	22	Female	Bachelor's degree	Nurses	Less than 5 years	Others	Yes	TV/Radio	Somewhat familiar	Fever Rash Headache Muscle aches Skin lesions	1	1	1	1	0	0	1	0	Contact with infected animals Direct contact with skin lesions of an infected person Respiratory droplets Sexual contact Touching contaminated objects or surfaces	1	1	1	1	1	0	Yes	Equally serious	Yes	Very concerned	Yes	Strongly agree	Yes	In-person Training	Somewhat confident	Yes	Isolation of infected patients Use of personal protective equipment Disinfection of contaminated surfaces Quarantine of suspected cases Vaccination	1	1	1	1	1	0	Isolation wards/rooms Personal Protective Equipment (e.g gloves, masks, gowns) Hand washing stations with soap and water Alcohol based hand sanitizer Disinfectants for surface cleaning Laboratory facilities for diagnostic testing Mpox-specific diagnostic kits Vaccine for mpox prevention Stock of antiviral medications for mpox treatment Rapid response team or taskforce for outbreak management Comm…	1	1	1	1	1
2025-07-12 07:37:18	2025-07-12 07:39:18	31	Male	Bachelor's degree	Nurses	Less than 5 years	Others	Yes	Social media	Somewhat familiar	Fever Rash Headache Muscle aches Swollen lymph nodes Skin lesions	1	1	1	1	1	0	1	0	Contact with infected animals Direct contact with skin lesions of an infected person Respiratory droplets Sexual contact Touching contaminated objects or surfaces	1	1	1	1	1	0	Yes	Equally serious	Yes	Very concerned	Yes	Strongly agree	Yes	Online training	Somewhat confident	Yes	Isolation of infected patients Use of personal protective equipment Disinfection of contaminated surfaces Quarantine of suspected cases Vaccination	1	1	1	1	1	0	Isolation wards/rooms Personal Protective Equipment (e.g gloves, masks, gowns) Hand washing stations with soap and water Alcohol based hand sanitizer Disinfectants for surface cleaning Laboratory facilities for diagnostic testing Mpox-specific diagnostic kits Vaccine for mpox prevention Stock of antiviral medications for mpox treatment Rapid response team or taskforce for outbreak management Comm…	1	1	1	1	1
2025-07-12 07:39:18	2025-07-12 07:41:09	22	Female	Postgraduate degree	Nurses	Less than 5 years	Others	Yes	Social media	Somewhat familiar	Fever Rash Headache Muscle aches Swollen lymph nodes Difficulty breathing Skin lesions	1	1	1	1	1	1	1	0	Respiratory droplets	0	0	1	0	0	0	Yes	More serious	Yes	Moderately concerned	No	Agree	No		Not confident at all	Not sure	Isolation of infected patients Use of personal protective equipment Disinfection of contaminated surfaces Quarantine of suspected cases Vaccination	1	1	1	1	1	0	Personal Protective Equipment (e.g gloves, masks, gowns) Hand washing stations with soap and water Alcohol based hand sanitizer Disinfectants for surface cleaning Laboratory facilities for diagnostic testing Rapid response team or taskforce for outbreak management Standard treatment guidelines or protocol for mpox	0	1	1	1	1
2025-07-12 07:41:09	2025-07-12 07:42:40	25	Female	Bachelor's degree	Nurses	Less than 5 years	Others	Yes	Social media	Somewhat familiar	Fever Rash Headache Muscle aches Swollen lymph nodes Difficulty breathing Skin lesions	1	1	1	1	1	1	1	0	Respiratory droplets	0	0	1	0	0	0	Yes	More serious	Yes	Very concerned	No	Agree	No		Not confident at all	Not sure	Isolation of infected patients Use of personal protective equipment Disinfection of contaminated surfaces Quarantine of suspected cases Vaccination	1	1	1	1	1	0	Isolation wards/rooms Personal Protective Equipment (e.g gloves, masks, gowns) Hand washing stations with soap and water Alcohol based hand sanitizer Disinfectants for surface cleaning Laboratory facilities for diagnostic testing Rapid response team or taskforce for outbreak management Standard treatment guidelines or protocol for mpox Ambulance services for patient transfer	1	1	1	1	1
2025-07-12 07:42:41	2025-07-12 07:44:29		Female	Bachelor's degree	Nurses	Less than 5 years	Others	Yes	Others	Somewhat familiar	Rash Swollen lymph nodes Skin lesions	0	1	0	0	1	0	1	0	Respiratory droplets	0	0	1	0	0	0	Yes	Equally serious	Yes	Very concerned	Not sure	Strongly agree	Not sure		Somewhat confident	Yes	Isolation of infected patients Use of personal protective equipment Vaccination	1	1	0	0	1	0	Isolation wards/rooms Personal Protective Equipment (e.g gloves, masks, gowns) Hand washing stations with soap and water Alcohol based hand sanitizer Laboratory facilities for diagnostic testing Vaccine for mpox prevention Communication and reporting tools (e.g., phones, computer, internet access) Training programs for health workers on mpox management Adequate waste disposal system for medical w…	1	1	1	1	0
2025-07-12 07:44:30	2025-07-12 07:45:57	24	Female	Bachelor's degree	Medical laboratory scientist	Less than 5 years	Laboratory Services	Yes	Social media	Somewhat familiar	Fever Rash Headache Swollen lymph nodes	1	1	1	0	1	0	0	0	Direct contact with skin lesions of an infected person	0	1	0	0	0	0	Yes	Equally serious	Yes	Very concerned	No	Strongly agree	Not sure		Somewhat confident	Not sure	Isolation of infected patients Use of personal protective equipment Disinfection of contaminated surfaces Quarantine of suspected cases	1	1	1	1	0	0	Personal Protective Equipment (e.g gloves, masks, gowns) Disinfectants for surface cleaning Adequate waste disposal system for medical waste	0	1	0	0	1
2025-07-12 07:45:57	2025-07-12 07:47:40	27	Female	Bachelor's degree	Nurses	Less than 5 years	Infectious Diseases	Yes	Colleagues/workplace	Very familiar	Fever Rash Headache Muscle aches Swollen lymph nodes Skin lesions	1	1	1	1	1	0	1	0	Direct contact with skin lesions of an infected person	0	1	0	0	0	0	Yes	Less serious	Yes	Very concerned	Yes	Agree	Yes	In-person Training	Very confident	Yes	Use of personal protective equipment	0	1	0	0	0	0	Isolation wards/rooms Personal Protective Equipment (e.g gloves, masks, gowns) Hand washing stations with soap and water Alcohol based hand sanitizer Disinfectants for surface cleaning Laboratory facilities for diagnostic testing Mpox-specific diagnostic kits Communication and reporting tools (e.g., phones, computer, internet access) Adequate waste disposal system for medical waste Ambulance serv…	1	1	1	1	1
2025-07-12 07:47:40	2025-07-12 07:49:10	22	Female	Bachelor's degree	Nurses	Less than 5 years	Others	Yes	TV/Radio	Very familiar	Fever Rash Headache Muscle aches Swollen lymph nodes Difficulty breathing Skin lesions	1	1	1	1	1	1	1	0	Contact with infected animals Direct contact with skin lesions of an infected person Respiratory droplets Sexual contact Touching contaminated objects or surfaces	1	1	1	1	1	0	Yes	Equally serious	Yes	Very concerned	Yes	Strongly agree	Yes	Printed guidelines	Very confident	Yes	Isolation of infected patients Use of personal protective equipment Disinfection of contaminated surfaces Quarantine of suspected cases Vaccination	1	1	1	1	1	0	Isolation wards/rooms Personal Protective Equipment (e.g gloves, masks, gowns) Hand washing stations with soap and water Alcohol based hand sanitizer Disinfectants for surface cleaning Laboratory facilities for diagnostic testing Mpox-specific diagnostic kits Vaccine for mpox prevention Rapid response team or taskforce for outbreak management Communication and reporting tools (e.g., phones, compu…	1	1	1	1	1
2025-07-12 07:49:10	2025-07-12 07:50:52	24	Female	Bachelor's degree	Nurses	Less than 5 years	Pediatrics	Yes	TV/Radio	Somewhat familiar	Rash Swollen lymph nodes Skin lesions	0	1	0	0	1	0	1	0	Contact with infected animals Direct contact with skin lesions of an infected person Respiratory droplets Touching contaminated objects or surfaces	1	1	1	0	1	0	Yes	Equally serious	Yes	Moderately concerned	No	Strongly agree	No		Not confident at all	Not sure	Isolation of infected patients Use of personal protective equipment Disinfection of contaminated surfaces Quarantine of suspected cases	1	1	1	1	0	0	Isolation wards/rooms Personal Protective Equipment (e.g gloves, masks, gowns) Hand washing stations with soap and water Alcohol based hand sanitizer Disinfectants for surface cleaning Laboratory facilities for diagnostic testing Mpox-specific diagnostic kits Vaccine for mpox prevention Stock of antiviral medications for mpox treatment Rapid response team or taskforce for outbreak management Comm…	1	1	1	1	1
2025-07-12 07:50:52	2025-07-12 07:52:26	26	Female	Bachelor's degree	Nurses	Less than 5 years	Others	Yes	Colleagues/workplace	Somewhat familiar	Fever Rash Headache Muscle aches Swollen lymph nodes	1	1	1	1	1	0	0	0	Contact with infected animals Direct contact with skin lesions of an infected person Respiratory droplets Touching contaminated objects or surfaces	1	1	1	0	1	0	Yes	Equally serious	Yes	Very concerned	No	Strongly agree	No		Somewhat confident	Not sure	Isolation of infected patients Use of personal protective equipment Disinfection of contaminated surfaces	1	1	1	0	0	0	Isolation wards/rooms Personal Protective Equipment (e.g gloves, masks, gowns) Hand washing stations with soap and water Alcohol based hand sanitizer Disinfectants for surface cleaning Laboratory facilities for diagnostic testing Rapid response team or taskforce for outbreak management Communication and reporting tools (e.g., phones, computer, internet access) Training programs for health workers…	1	1	1	1	1
2025-07-12 07:52:26	2025-07-12 07:54:19	27	Female	Bachelor's degree	Nurses	Less than 5 years	Others	Yes	Colleagues/workplace	Very familiar	Fever Rash Headache Muscle aches Swollen lymph nodes Difficulty breathing Skin lesions	1	1	1	1	1	1	1	0	Contact with infected animals Direct contact with skin lesions of an infected person Respiratory droplets Sexual contact	1	1	1	1	0	0	Yes	Equally serious	Yes	Very concerned	Yes	Strongly agree	Yes	Printed guidelines	Very confident	Yes	Isolation of infected patients Use of personal protective equipment Disinfection of contaminated surfaces Quarantine of suspected cases Vaccination	1	1	1	1	1	0	Isolation wards/rooms Personal Protective Equipment (e.g gloves, masks, gowns) Hand washing stations with soap and water Alcohol based hand sanitizer Disinfectants for surface cleaning Laboratory facilities for diagnostic testing Mpox-specific diagnostic kits Vaccine for mpox prevention Rapid response team or taskforce for outbreak management Communication and reporting tools (e.g., phones, compu…	1	1	1	1	1
2025-07-12 07:54:19	2025-07-12 07:55:59	26	Female	Bachelor's degree	Nurses	Less than 5 years	Others	Yes	Others	Somewhat familiar	Fever Rash Headache Muscle aches Difficulty breathing Skin lesions	1	1	1	1	0	1	1	0	Contact with infected animals Direct contact with skin lesions of an infected person Respiratory droplets Touching contaminated objects or surfaces	1	1	1	0	1	0	Yes	Equally serious	Yes	Very concerned	Not sure	Strongly agree	Not sure		Somewhat confident	Yes	Isolation of infected patients Use of personal protective equipment Disinfection of contaminated surfaces Quarantine of suspected cases Vaccination	1	1	1	1	1	0	Isolation wards/rooms Personal Protective Equipment (e.g gloves, masks, gowns) Hand washing stations with soap and water Alcohol based hand sanitizer Disinfectants for surface cleaning Laboratory facilities for diagnostic testing Stock of antiviral medications for mpox treatment Standard treatment guidelines or protocol for mpox Adequate waste disposal system for medical waste Adequate electricit…	1	1	1	1	1
2025-07-12 07:57:50	2025-07-12 08:00:02	27	Male	Bachelor's degree	Nurses	Less than 5 years	Others	Yes	Colleagues/workplace	Somewhat familiar	Fever Rash Headache Skin lesions	1	1	1	0	0	0	1	0	Contact with infected animals Direct contact with skin lesions of an infected person Touching contaminated objects or surfaces	1	1	0	0	1	0	Yes	Less serious	Yes	Very concerned	Not sure	Strongly agree	Not sure		Not confident at all	No	Isolation of infected patients Use of personal protective equipment Disinfection of contaminated surfaces Quarantine of suspected cases Vaccination	1	1	1	1	1	0	Isolation wards/rooms Personal Protective Equipment (e.g gloves, masks, gowns) Hand washing stations with soap and water Disinfectants for surface cleaning Laboratory facilities for diagnostic testing Mpox-specific diagnostic kits Vaccine for mpox prevention Stock of antiviral medications for mpox treatment Rapid response team or taskforce for outbreak management Standard treatment guidelines or …	1	1	1	0	1
2025-07-12 08:00:02	2025-07-12 08:01:49	24	Female	Bachelor's degree	Nurses	Less than 5 years	Emergency Care	Yes	Social media	Somewhat familiar	Fever Rash Headache Muscle aches Difficulty breathing	1	1	1	1	0	1	0	0	Contact with infected animals Respiratory droplets Touching contaminated objects or surfaces	1	0	1	0	1	0	Yes	Equally serious	Yes	Very concerned	No	Agree	Yes	Online training	Somewhat confident	No	Isolation of infected patients Use of personal protective equipment Quarantine of suspected cases Vaccination	1	1	0	1	1	0	Isolation wards/rooms Personal Protective Equipment (e.g gloves, masks, gowns) Hand washing stations with soap and water Alcohol based hand sanitizer Disinfectants for surface cleaning Vaccine for mpox prevention Rapid response team or taskforce for outbreak management Adequate electricity supply and backup generators Cold chain storage for vaccines or laboratory specimens Community awareness and…	1	1	1	1	1
2025-07-12 08:01:49	2025-07-12 08:03:21	30	Female	Bachelor's degree	Nurses	Less than 5 years	Others	Yes	Social media	Somewhat familiar	Fever Rash Headache Muscle aches Swollen lymph nodes Skin lesions	1	1	1	1	1	0	1	0	Contact with infected animals Direct contact with skin lesions of an infected person Respiratory droplets Sexual contact Touching contaminated objects or surfaces	1	1	1	1	1	0	Yes	Equally serious	Yes	Very concerned	Yes	Strongly agree	Yes	In-person Training	Very confident	Yes	Isolation of infected patients Use of personal protective equipment Disinfection of contaminated surfaces Quarantine of suspected cases Vaccination	1	1	1	1	1	0	Isolation wards/rooms Personal Protective Equipment (e.g gloves, masks, gowns) Hand washing stations with soap and water Alcohol based hand sanitizer Disinfectants for surface cleaning Laboratory facilities for diagnostic testing Mpox-specific diagnostic kits Vaccine for mpox prevention Stock of antiviral medications for mpox treatment Rapid response team or taskforce for outbreak management Comm…	1	1	1	1	1
2025-07-12 08:03:21	2025-07-12 08:05:01	40	Female	Bachelor's degree	Nurses	Less than 5 years	Others	Yes	Social media	Somewhat familiar	Fever Rash Headache Muscle aches Swollen lymph nodes	1	1	1	1	1	0	0	0	Contact with infected animals Direct contact with skin lesions of an infected person Respiratory droplets Sexual contact Touching contaminated objects or surfaces	1	1	1	1	1	0	Yes	Equally serious	Yes	Very concerned	Yes	Strongly agree	Yes	In-person Training	Very confident	Yes	Isolation of infected patients Use of personal protective equipment Disinfection of contaminated surfaces Quarantine of suspected cases Vaccination	1	1	1	1	1	0	Isolation wards/rooms Personal Protective Equipment (e.g gloves, masks, gowns) Hand washing stations with soap and water Alcohol based hand sanitizer Disinfectants for surface cleaning Laboratory facilities for diagnostic testing Mpox-specific diagnostic kits Vaccine for mpox prevention Stock of antiviral medications for mpox treatment Rapid response team or taskforce for outbreak management Comm…	1	1	1	1	1
2025-07-12 08:05:01	2025-07-12 08:06:51	38	Female	Bachelor's degree	Nurses	5-10 years	Emergency Care	Yes	Colleagues/workplace	Somewhat familiar	Fever Rash Headache	1	1	1	0	0	0	0	0	Contact with infected animals	1	0	0	0	0	0	Yes	Equally serious	Yes	Very concerned	Not sure	Strongly agree	No		Somewhat confident	Not sure	Isolation of infected patients	1	0	0	0	0	0	Isolation wards/rooms Personal Protective Equipment (e.g gloves, masks, gowns) Hand washing stations with soap and water Alcohol based hand sanitizer Laboratory facilities for diagnostic testing	1	1	1	1	0
2025-07-12 08:06:51	2025-07-12 08:08:26	28	Female	Diploma/Certificate	Nurses	5-10 years	Emergency Care	Yes	Scientific journals	Somewhat familiar	Fever Rash Skin lesions	1	1	0	0	0	0	1	0	Contact with infected animals Direct contact with skin lesions of an infected person	1	1	0	0	0	0	Yes	Equally serious	Yes	Moderately concerned	No	Strongly agree	No		Not confident at all	No	Isolation of infected patients Use of personal protective equipment Quarantine of suspected cases Vaccination	1	1	0	1	1	0	Isolation wards/rooms Hand washing stations with soap and water Alcohol based hand sanitizer Disinfectants for surface cleaning Adequate waste disposal system for medical waste Ambulance services for patient transfer Adequate electricity supply and backup generators	1	0	1	1	1
2025-07-12 08:08:26	2025-07-12 08:09:49	26	Female	Bachelor's degree	Medical laboratory scientist	Less than 5 years	Laboratory Services	Yes	Colleagues/workplace	Somewhat familiar	Fever Rash Swollen lymph nodes Skin lesions	1	1	0	0	1	0	1	0	Contact with infected animals Direct contact with skin lesions of an infected person Sexual contact	1	1	0	1	0	0	Yes	Less serious	Yes	Moderately concerned	No	Agree	No		Somewhat confident	Not sure	Use of personal protective equipment Vaccination	0	1	0	0	1	0	Personal Protective Equipment (e.g gloves, masks, gowns) Hand washing stations with soap and water Disinfectants for surface cleaning Laboratory facilities for diagnostic testing Adequate waste disposal system for medical waste	0	1	1	0	1
2025-07-12 08:09:49	2025-07-12 08:12:12	29	Male	Bachelor's degree	Medical laboratory scientist	Less than 5 years	Laboratory Services	Yes	Social media	Somewhat familiar	Fever Rash Headache Muscle aches Skin lesions	1	1	1	1	0	0	1	0	Contact with infected animals Direct contact with skin lesions of an infected person Touching contaminated objects or surfaces	1	1	0	0	1	0	Yes	Equally serious	Yes	Very concerned	No	Strongly agree	No		Not confident at all	Not sure	Isolation of infected patients Use of personal protective equipment Disinfection of contaminated surfaces Quarantine of suspected cases Vaccination	1	1	1	1	1	0	Personal Protective Equipment (e.g gloves, masks, gowns) Hand washing stations with soap and water Alcohol based hand sanitizer Disinfectants for surface cleaning Laboratory facilities for diagnostic testing Adequate electricity supply and backup generators Cold chain storage for vaccines or laboratory specimens Community awareness and education materials on mpox prevention	0	1	1	1	1
2025-07-12 08:12:12	2025-07-12 08:13:38	24	Female	Bachelor's degree	Nurses	Less than 5 years	Others	Yes	Social media	Somewhat familiar	Fever Rash Headache Muscle aches Swollen lymph nodes Skin lesions	1	1	1	1	1	0	1	0	Contact with infected animals Direct contact with skin lesions of an infected person Touching contaminated objects or surfaces	1	1	0	0	1	0	Yes	Equally serious	Yes	Very concerned	Not sure	Strongly agree	Yes	Online training	Somewhat confident	Not sure	Isolation of infected patients Use of personal protective equipment Disinfection of contaminated surfaces Quarantine of suspected cases Vaccination	1	1	1	1	1	0	Isolation wards/rooms Personal Protective Equipment (e.g gloves, masks, gowns) Hand washing stations with soap and water Alcohol based hand sanitizer Disinfectants for surface cleaning Laboratory facilities for diagnostic testing Communication and reporting tools (e.g., phones, computer, internet access) Adequate waste disposal system for medical waste Ambulance services for patient transfer Adeq…	1	1	1	1	1
2025-07-12 08:13:38	2025-07-12 08:15:11	24	Female	Bachelor's degree	Nurses	Less than 5 years		Yes			Fever Rash Headache Muscle aches Swollen lymph nodes Skin lesions	1	1	1	1	1	0	1	0	Contact with infected animals Direct contact with skin lesions of an infected person Sexual contact	1	1	0	1	0	0	Yes	Equally serious	Yes	Very concerned	No	Strongly agree	Yes	Online training	Somewhat confident	Not sure	Isolation of infected patients Use of personal protective equipment Disinfection of contaminated surfaces Quarantine of suspected cases Vaccination	1	1	1	1	1	0	Personal Protective Equipment (e.g gloves, masks, gowns) Hand washing stations with soap and water Alcohol based hand sanitizer Disinfectants for surface cleaning Laboratory facilities for diagnostic testing Communication and reporting tools (e.g., phones, computer, internet access) Adequate waste disposal system for medical waste Adequate electricity supply and backup generators	0	1	1	1	1
2025-07-12 08:15:11	2025-07-12 08:16:32	24	Female	Bachelor's degree	Nurses	Less than 5 years	Others	Yes	Scientific journals	Somewhat familiar	Fever Headache Muscle aches Swollen lymph nodes	1	0	1	1	1	0	0	0	Contact with infected animals Direct contact with skin lesions of an infected person	1	1	0	0	0	0	Yes	Equally serious	Yes	Very concerned	No	Strongly agree	Not sure		Somewhat confident	No	Isolation of infected patients Use of personal protective equipment Quarantine of suspected cases Vaccination	1	1	0	1	1	0	Isolation wards/rooms Personal Protective Equipment (e.g gloves, masks, gowns) Hand washing stations with soap and water Alcohol based hand sanitizer Laboratory facilities for diagnostic testing Stock of antiviral medications for mpox treatment Ambulance services for patient transfer Cold chain storage for vaccines or laboratory specimens	1	1	1	1	0
2025-07-12 08:16:32	2025-07-12 08:18:00	29	Female	Bachelor's degree	Nurses	Less than 5 years	Emergency Care	Yes	Social media	Not familiar at all	Fever Rash Headache Muscle aches Swollen lymph nodes Difficulty breathing	1	1	1	1	1	1	0	0	Contact with infected animals Direct contact with skin lesions of an infected person Touching contaminated objects or surfaces	1	1	0	0	1	0	Yes	Less serious	Yes	Very concerned	No	Strongly agree	Not sure		Not confident at all	Not sure	Isolation of infected patients Use of personal protective equipment Disinfection of contaminated surfaces Quarantine of suspected cases Vaccination	1	1	1	1	1	0	Isolation wards/rooms Personal Protective Equipment (e.g gloves, masks, gowns) Hand washing stations with soap and water Alcohol based hand sanitizer Laboratory facilities for diagnostic testing Vaccine for mpox prevention Stock of antiviral medications for mpox treatment Standard treatment guidelines or protocol for mpox Adequate waste disposal system for medical waste Ambulance services for pat…	1	1	1	1	0
2025-07-12 08:18:00	2025-07-12 08:19:42	24	Female	Bachelor's degree	Nurses	Less than 5 years	Others	Yes	Social media	Very familiar	Fever Rash Headache Muscle aches Swollen lymph nodes Difficulty breathing	1	1	1	1	1	1	0	0	Contact with infected animals Direct contact with skin lesions of an infected person Respiratory droplets Sexual contact Touching contaminated objects or surfaces	1	1	1	1	1	0	Yes	Equally serious	Yes	Very concerned	Yes	Strongly agree	Not sure		Very confident	Not sure	Isolation of infected patients Use of personal protective equipment Disinfection of contaminated surfaces Quarantine of suspected cases Vaccination	1	1	1	1	1	0	Isolation wards/rooms Personal Protective Equipment (e.g gloves, masks, gowns) Hand washing stations with soap and water Alcohol based hand sanitizer Disinfectants for surface cleaning Laboratory facilities for diagnostic testing Vaccine for mpox prevention Rapid response team or taskforce for outbreak management Communication and reporting tools (e.g., phones, computer, internet access) Standard…	1	1	1	1	1
2025-07-12 08:19:42	2025-07-12 08:21:13	27	Female	Bachelor's degree	Nurses	Less than 5 years	Others	Yes	TV/Radio	Very familiar	Fever Rash Headache	1	1	1	0	0	0	0	0	Direct contact with skin lesions of an infected person Sexual contact	0	1	0	1	0	0	Yes	More serious	Not sure	Very concerned	Yes	Agree	Yes	In-person Training	Somewhat confident	Yes	Isolation of infected patients Disinfection of contaminated surfaces Vaccination	1	0	1	0	1	0	Isolation wards/rooms Personal Protective Equipment (e.g gloves, masks, gowns) Alcohol based hand sanitizer Laboratory facilities for diagnostic testing Vaccine for mpox prevention Stock of antiviral medications for mpox treatment Rapid response team or taskforce for outbreak management Communication and reporting tools (e.g., phones, computer, internet access) Adequate waste disposal system for …	1	1	0	1	0
2025-07-12 08:21:13	2025-07-12 08:22:46	18	Female	Bachelor's degree	Medical laboratory scientist	Less than 5 years	Laboratory Services	Yes	Social media	Somewhat familiar	Fever Rash Headache	1	1	1	0	0	0	0	0	Contact with infected animals Direct contact with skin lesions of an infected person Respiratory droplets	1	1	1	0	0	0	Yes	Equally serious	Yes		No	Strongly agree	No		Not confident at all	No	Isolation of infected patients	1	0	0	0	0	0
2025-07-12 08:22:46	2025-07-12 08:23:56	26	Female	Bachelor's degree	Medical laboratory scientist	Less than 5 years	Laboratory Services	Yes	Others	Not familiar at all	Rash	0	1	0	0	0	0	0	0	I don't know	0	0	0	0	0	1		More serious	Yes	Very concerned	Yes	Agree	No		Very confident	Not sure	I am not familiar with any preventive measures	0	0	0	0	0	1	Isolation wards/rooms Personal Protective Equipment (e.g gloves, masks, gowns) Hand washing stations with soap and water Mpox-specific diagnostic kits Communication and reporting tools (e.g., phones, computer, internet access) Training programs for health workers on mpox management Community awareness and education materials on mpox prevention	1	1	1	0	0
2025-07-12 08:23:56	2025-07-12 08:25:32	26	Male	Bachelor's degree	Medical laboratory scientist	Less than 5 years	Laboratory Services	Yes	Others	Not familiar at all	Fever Rash Swollen lymph nodes	1	1	0	0	1	0	0	0								Yes	Equally serious	Yes	Very concerned	Not sure	Agree	No		Somewhat confident	Not sure	Isolation of infected patients Use of personal protective equipment Disinfection of contaminated surfaces Quarantine of suspected cases Vaccination	1	1	1	1	1	0	Isolation wards/rooms Personal Protective Equipment (e.g gloves, masks, gowns) Hand washing stations with soap and water Alcohol based hand sanitizer Disinfectants for surface cleaning Laboratory facilities for diagnostic testing Stock of antiviral medications for mpox treatment Rapid response team or taskforce for outbreak management Communication and reporting tools (e.g., phones, computer, int…	1	1	1	1	1
2025-07-12 08:25:32	2025-07-12 08:26:57	39	Male	Bachelor's degree	Medical laboratory scientist	5-10 years	Laboratory Services	Yes	Social media	Not familiar at all	Rash	0	1	0	0	0	0	0	0	I don't know	0	0	0	0	0	1	Yes	Equally serious	Yes	Very concerned	Yes	Agree	No		Not confident at all	Not sure	I am not familiar with any preventive measures	0	0	0	0	0	1	Personal Protective Equipment (e.g gloves, masks, gowns)	0	1	0	0	0
2025-07-12 08:26:57	2025-07-12 08:28:48	38	Male	Bachelor's degree	Medical laboratory scientist	5-10 years	Laboratory Services	Yes	Colleagues/workplace	Somewhat familiar	Fever Rash Headache Skin lesions	1	1	1	0	0	0	1	0	Contact with infected animals Direct contact with skin lesions of an infected person	1	1	0	0	0	0	Yes	Equally serious	Yes	Very concerned	No	Strongly agree	No		Not confident at all	No	Use of personal protective equipment Disinfection of contaminated surfaces Vaccination	0	1	1	0	1	0	Personal Protective Equipment (e.g gloves, masks, gowns) Hand washing stations with soap and water Alcohol based hand sanitizer Disinfectants for surface cleaning Laboratory facilities for diagnostic testing Adequate electricity supply and backup generators	0	1	1	1	1
2025-07-12 08:28:48	2025-07-12 08:30:06	26	Female	Bachelor's degree	Medical laboratory scientist	Less than 5 years	Laboratory Services	Yes	TV/Radio	Somewhat familiar	Fever Rash Headache Difficulty breathing Skin lesions	1	1	1	0	0	1	1	0	Direct contact with skin lesions of an infected person Respiratory droplets	0	1	1	0	0	0	Yes	Equally serious	Yes	Very concerned	Not sure	Agree	Not sure		Somewhat confident	Not sure	Isolation of infected patients Use of personal protective equipment Disinfection of contaminated surfaces Quarantine of suspected cases Vaccination	1	1	1	1	1	0	Isolation wards/rooms Personal Protective Equipment (e.g gloves, masks, gowns) Hand washing stations with soap and water Disinfectants for surface cleaning Communication and reporting tools (e.g., phones, computer, internet access) Adequate waste disposal system for medical waste Adequate electricity supply and backup generators Cold chain storage for vaccines or laboratory specimens	1	1	1	0	1
2025-07-12 08:30:06	2025-07-12 08:32:10	26	Female	Postgraduate degree	Medical laboratory scientist	Less than 5 years	Laboratory Services	Yes	Social media	Not familiar at all	Rash	0	1	0	0	0	0	0	0	Direct contact with skin lesions of an infected person	0	1	0	0	0	0	Yes	More serious	Yes	Very concerned	No	Strongly agree	No		Somewhat confident	Not sure	I am not familiar with any preventive measures	0	0	0	0	0	1	Personal Protective Equipment (e.g gloves, masks, gowns)	0	1	0	0	0
2025-07-12 08:32:10	2025-07-12 08:33:25	30	Female	Bachelor's degree	Medical laboratory scientist	Less than 5 years	Laboratory Services	Yes	Social media	Somewhat familiar	Fever Rash Muscle aches Difficulty breathing Skin lesions	1	1	0	1	0	1	1	0	Contact with infected animals Direct contact with skin lesions of an infected person Respiratory droplets Touching contaminated objects or surfaces	1	1	1	0	1	0	Yes	Less serious	Yes	Moderately concerned	Not sure	Strongly agree	No		Somewhat confident	Not sure	Use of personal protective equipment	0	1	0	0	0	0	Personal Protective Equipment (e.g gloves, masks, gowns) Hand washing stations with soap and water Alcohol based hand sanitizer Disinfectants for surface cleaning	0	1	1	1	1
2025-07-12 08:33:26	2025-07-12 08:34:57	27	Male	Bachelor's degree	Medical laboratory scientist	Less than 5 years	Laboratory Services	Yes	Social media	Very familiar	Fever Rash Swollen lymph nodes	1	1	0	0	1	0	0	0	Direct contact with skin lesions of an infected person	0	1	0	0	0	0	Yes	Equally serious	Yes	Very concerned	No	Strongly agree	No		Not confident at all	Not sure	Use of personal protective equipment Disinfection of contaminated surfaces	0	1	1	0	0	0	Personal Protective Equipment (e.g gloves, masks, gowns) Hand washing stations with soap and water Alcohol based hand sanitizer Disinfectants for surface cleaning Adequate waste disposal system for medical waste Adequate electricity supply and backup generators	0	1	1	1	1
2025-07-12 08:34:57	2025-07-12 08:36:49	28	Male	Bachelor's degree	Medical laboratory scientist	Less than 5 years	Laboratory Services	Yes	TV/Radio	Somewhat familiar	Fever Rash Headache Difficulty breathing Skin lesions	1	1	1	0	0	1	1	0	Contact with infected animals Direct contact with skin lesions of an infected person Respiratory droplets	1	1	1	0	0	0	Yes	More serious	Yes	Very concerned	No	Strongly agree	No		Somewhat confident	Not sure	Isolation of infected patients Use of personal protective equipment Disinfection of contaminated surfaces Quarantine of suspected cases	1	1	1	1	0	0	Personal Protective Equipment (e.g gloves, masks, gowns) Hand washing stations with soap and water Alcohol based hand sanitizer Disinfectants for surface cleaning Stock of antiviral medications for mpox treatment Training programs for health workers on mpox management Adequate waste disposal system for medical waste Adequate electricity supply and backup generators Community awareness and educati…	0	1	1	1	1
2025-07-12 08:36:49	2025-07-12 08:38:24	20	Female	Postgraduate degree	Nurses	Less than 5 years	Others	Yes	Social media	Not familiar at all	Fever Rash Headache Muscle aches Swollen lymph nodes	1	1	1	1	1	0	0	0								Yes	Equally serious	Yes	Very concerned	No	Agree	No		Very confident	No	Isolation of infected patients Use of personal protective equipment Disinfection of contaminated surfaces Quarantine of suspected cases Vaccination	1	1	1	1	1	0	Isolation wards/rooms Personal Protective Equipment (e.g gloves, masks, gowns) Hand washing stations with soap and water Alcohol based hand sanitizer Disinfectants for surface cleaning Laboratory facilities for diagnostic testing Mpox-specific diagnostic kits Vaccine for mpox prevention Stock of antiviral medications for mpox treatment Rapid response team or taskforce for outbreak management Comm…	1	1	1	1	1
2025-07-12 08:38:24	2025-07-12 08:39:43	24	Female	Bachelor's degree	Medical laboratory scientist	Less than 5 years	Laboratory Services	Yes	Colleagues/workplace	Somewhat familiar	Fever Rash Headache Swollen lymph nodes	1	1	1	0	1	0	0	0	I don't know	0	0	0	0	0	1	Yes	Equally serious	Yes	Very concerned	No	Strongly agree	No		Not confident at all	No	Isolation of infected patients Use of personal protective equipment Vaccination	1	1	0	0	1	0	Isolation wards/rooms Personal Protective Equipment (e.g gloves, masks, gowns) Hand washing stations with soap and water Alcohol based hand sanitizer Disinfectants for surface cleaning Adequate waste disposal system for medical waste	1	1	1	1	1
2025-07-12 08:39:43	2025-07-12 08:41:01		Female	Postgraduate degree	Medical laboratory scientist	5-10 years	Laboratory Services	Yes	Social media	Not familiar at all	Fever Rash Swollen lymph nodes Difficulty breathing Skin lesions	1	1	0	0	1	1	1	0	Contact with infected animals Direct contact with skin lesions of an infected person Respiratory droplets Sexual contact Touching contaminated objects or surfaces	1	1	1	1	1	0	Yes	Equally serious	Yes	Very concerned	No	Strongly agree	No		Not confident at all	Not sure	Isolation of infected patients Use of personal protective equipment Disinfection of contaminated surfaces Quarantine of suspected cases Vaccination	1	1	1	1	1	0	Isolation wards/rooms Personal Protective Equipment (e.g gloves, masks, gowns) Hand washing stations with soap and water Disinfectants for surface cleaning Adequate waste disposal system for medical waste	1	1	1	0	1
2025-07-12 08:41:01	2025-07-12 08:42:29	26	Female	Postgraduate degree	Doctor	Less than 5 years	Others	Yes	Colleagues/workplace	Somewhat familiar	Fever Rash Headache Muscle aches Swollen lymph nodes	1	1	1	1	1	0	0	0	Contact with infected animals Direct contact with skin lesions of an infected person Respiratory droplets Touching contaminated objects or surfaces	1	1	1	0	1	0	No	Equally serious	Yes	Very concerned	Not sure	Agree	No			No	Isolation of infected patients Use of personal protective equipment Disinfection of contaminated surfaces Quarantine of suspected cases	1	1	1	1	0	0	Personal Protective Equipment (e.g gloves, masks, gowns) Hand washing stations with soap and water Alcohol based hand sanitizer Disinfectants for surface cleaning Communication and reporting tools (e.g., phones, computer, internet access) Adequate waste disposal system for medical waste Ambulance services for patient transfer	0	1	1	1	1
2025-07-12 08:42:29	2025-07-12 08:43:50	43	Female	Bachelor's degree	Nurses	11-15 years	Emergency Care	Yes	Scientific journals		Fever Rash Headache Swollen lymph nodes Difficulty breathing Skin lesions	1	1	1	0	1	1	1	0	Contact with infected animals Direct contact with skin lesions of an infected person Respiratory droplets	1	1	1	0	0	0	Yes	Equally serious	Yes	Very concerned	No	Strongly agree	No		Somewhat confident	Not sure	Isolation of infected patients Use of personal protective equipment Quarantine of suspected cases Vaccination	1	1	0	1	1	0	Isolation wards/rooms Personal Protective Equipment (e.g gloves, masks, gowns) Hand washing stations with soap and water Alcohol based hand sanitizer Disinfectants for surface cleaning Rapid response team or taskforce for outbreak management Communication and reporting tools (e.g., phones, computer, internet access) Adequate waste disposal system for medical waste Ambulance services for patient t…	1	1	1	1	1
2025-07-12 08:43:50	2025-07-12 08:45:08	25	Female	Bachelor's degree	Nurses	Less than 5 years	Emergency Care	Yes	Social media	Somewhat familiar	Fever Rash Headache Difficulty breathing	1	1	1	0	0	1	0	0	Contact with infected animals Direct contact with skin lesions of an infected person Respiratory droplets Touching contaminated objects or surfaces	1	1	1	0	1	0	Yes	Less serious	Yes	Moderately concerned	No	Strongly agree	No		Not confident at all	No	Isolation of infected patients Use of personal protective equipment Disinfection of contaminated surfaces Quarantine of suspected cases Vaccination	1	1	1	1	1	0	Personal Protective Equipment (e.g gloves, masks, gowns) Hand washing stations with soap and water Disinfectants for surface cleaning Communication and reporting tools (e.g., phones, computer, internet access) Adequate waste disposal system for medical waste Ambulance services for patient transfer Adequate electricity supply and backup generators Cold chain storage for vaccines or laboratory spec…	0	1	1	0	1
2025-07-12 08:45:08	2025-07-12 08:57:21	26	Female	Bachelor's degree	Nurses	Less than 5 years	Others	Yes	Colleagues/workplace	Somewhat familiar	Fever Rash Headache Muscle aches Swollen lymph nodes	1	1	1	1	1	0	0	0	Contact with infected animals Direct contact with skin lesions of an infected person Respiratory droplets Touching contaminated objects or surfaces	1	1	1	0	1	0	Yes	Equally serious	Yes	Very concerned	No	Strongly agree	No		Somewhat confident	No	Isolation of infected patients Use of personal protective equipment Disinfection of contaminated surfaces	1	1	1	0	0	0	Personal Protective Equipment (e.g gloves, masks, gowns) Hand washing stations with soap and water Disinfectants for surface cleaning Rapid response team or taskforce for outbreak management Communication and reporting tools (e.g., phones, computer, internet access) Adequate waste disposal system for medical waste Ambulance services for patient transfer	0	1	1	0	1
2025-07-12 08:57:21	2025-07-12 08:58:35	22	Female	Bachelor's degree	Nurses	5-10 years	Others	Yes	Social media	Very familiar	Fever Rash Headache Muscle aches Swollen lymph nodes	1	1	1	1	1	0	0	0	Contact with infected animals Direct contact with skin lesions of an infected person Sexual contact	1	1	0	1	0	0	Yes	Less serious	Yes	Very concerned	No	Strongly agree	No		Not confident at all	Not sure	Isolation of infected patients Use of personal protective equipment	1	1	0	0	0	0	Isolation wards/rooms Personal Protective Equipment (e.g gloves, masks, gowns) Hand washing stations with soap and water Alcohol based hand sanitizer Laboratory facilities for diagnostic testing	1	1	1	1	0
2025-07-12 08:58:35	2025-07-12 08:59:55	21	Female	Bachelor's degree	Nurses	5-10 years	Others	Yes	Colleagues/workplace	Not familiar at all	Rash	0	1	0	0	0	0	0	0	Direct contact with skin lesions of an infected person	0	1	0	0	0	0	Not sure	Equally serious	Yes	Moderately concerned	No	Strongly agree	No		Not confident at all	No	Use of personal protective equipment	0	1	0	0	0	0	Isolation wards/rooms Personal Protective Equipment (e.g gloves, masks, gowns) Hand washing stations with soap and water Alcohol based hand sanitizer Disinfectants for surface cleaning Laboratory facilities for diagnostic testing Stock of antiviral medications for mpox treatment Rapid response team or taskforce for outbreak management Communication and reporting tools (e.g., phones, computer, int…	1	1	1	1	1
2025-07-12 08:59:55	2025-07-12 09:01:16		Male	Bachelor's degree	Nurses	5-10 years	Pediatrics	Yes	Social media	Somewhat familiar	Fever Rash Headache Swollen lymph nodes	1	1	1	0	1	0	0	0	Contact with infected animals Direct contact with skin lesions of an infected person	1	1	0	0	0	0	Yes	More serious	Yes	Very concerned	No	Agree	No		Not confident at all	Not sure	Isolation of infected patients Use of personal protective equipment Disinfection of contaminated surfaces Vaccination	1	1	1	0	1	0	Hand washing stations with soap and water Alcohol based hand sanitizer Disinfectants for surface cleaning Laboratory facilities for diagnostic testing Rapid response team or taskforce for outbreak management Communication and reporting tools (e.g., phones, computer, internet access) Ambulance services for patient transfer Adequate electricity supply and backup generators Cold chain storage for va…	0	0	1	1	1
2025-07-12 09:01:16	2025-07-12 09:02:14		Female	Bachelor's degree	Nurses	Less than 5 years														Direct contact with skin lesions of an infected person	0	1	0	0	0	0	No	Not serious at all	Yes		No	Strongly agree	No			No	Isolation of infected patients	1	0	0	0	0	0
2025-07-12 09:02:14	2025-07-12 09:03:24	49	Female	Postgraduate degree	Doctor	More than 15 years	Others	Yes	Social media	Somewhat familiar	Fever Rash Headache Muscle aches Swollen lymph nodes Skin lesions	1	1	1	1	1	0	1	0								Not sure		Yes		No	Strongly agree	No		Somewhat confident	No	Isolation of infected patients Use of personal protective equipment Disinfection of contaminated surfaces Quarantine of suspected cases	1	1	1	1	0	0	Hand washing stations with soap and water Alcohol based hand sanitizer Disinfectants for surface cleaning	0	0	1	1	1
2025-07-12 09:03:24	2025-07-12 09:05:13	32	Female		Nurses	11-15 years	Emergency Care	Yes	TV/Radio	Somewhat familiar	Rash	0	1	0	0	0	0	0	0	Direct contact with skin lesions of an infected person	0	1	0	0	0	0	Yes	Equally serious	Yes	Very concerned	Not sure	Agree	Not sure		Somewhat confident	Not sure	Isolation of infected patients	1	0	0	0	0	0	Personal Protective Equipment (e.g gloves, masks, gowns) Hand washing stations with soap and water Alcohol based hand sanitizer Laboratory facilities for diagnostic testing Adequate waste disposal system for medical waste Ambulance services for patient transfer Adequate electricity supply and backup generators Cold chain storage for vaccines or laboratory specimens	0	1	1	1	0
2025-07-12 09:05:13	2025-07-12 09:06:26	30	Female	Bachelor's degree	Nurses	11-15 years	Pediatrics	Yes	TV/Radio	Somewhat familiar	Rash	0	1	0	0	0	0	0	0	Direct contact with skin lesions of an infected person	0	1	0	0	0	0	Yes	Equally serious	Yes	Very concerned	Not sure	Agree	Not sure		Somewhat confident	Not sure	Quarantine of suspected cases	0	0	0	1	0	0	Personal Protective Equipment (e.g gloves, masks, gowns) Hand washing stations with soap and water Laboratory facilities for diagnostic testing Adequate waste disposal system for medical waste Ambulance services for patient transfer Adequate electricity supply and backup generators	0	1	1	0	0
2025-07-12 09:06:26	2025-07-12 09:08:15	21	Female	Postgraduate degree	Nurses	5-10 years	Others	Yes	Scientific journals	Somewhat familiar	Rash Headache Muscle aches Swollen lymph nodes	0	1	1	1	1	0	0	0	Direct contact with skin lesions of an infected person Sexual contact	0	1	0	1	0	0	Yes	Equally serious	Yes	Very concerned	Not sure	Strongly agree	Not sure		Somewhat confident	Not sure	Isolation of infected patients Use of personal protective equipment Quarantine of suspected cases Vaccination	1	1	0	1	1	0	Personal Protective Equipment (e.g gloves, masks, gowns) Hand washing stations with soap and water Alcohol based hand sanitizer Disinfectants for surface cleaning Communication and reporting tools (e.g., phones, computer, internet access) Adequate waste disposal system for medical waste Ambulance services for patient transfer Adequate electricity supply and backup generators	0	1	1	1	1
2025-07-12 09:08:15	2025-07-12 09:10:24	37	Female	Postgraduate degree	Nurses	5-10 years	Others	Yes	TV/Radio	Somewhat familiar	Rash Muscle aches Swollen lymph nodes Skin lesions	0	1	0	1	1	0	1	0	Direct contact with skin lesions of an infected person	0	1	0	0	0	0	Yes	Equally serious	Yes	Very concerned	No	Strongly agree	No		Not confident at all	No	I am not familiar with any preventive measures	0	0	0	0	0	1	Personal Protective Equipment (e.g gloves, masks, gowns) Hand washing stations with soap and water Alcohol based hand sanitizer Disinfectants for surface cleaning	0	1	1	1	1
2025-07-12 09:10:24	2025-07-12 09:12:01		Male	Bachelor's degree	Doctor	Less than 5 years	Emergency Care	Yes	Others	Very familiar	Fever Rash Headache Muscle aches Skin lesions	1	1	1	1	0	0	1	0	Direct contact with skin lesions of an infected person	0	1	0	0	0	0	No	Less serious	Yes	Not concerned at all	No	Strongly agree	No		Very confident	No	Isolation of infected patients Use of personal protective equipment Disinfection of contaminated surfaces Quarantine of suspected cases Vaccination	1	1	1	1	1	0	Isolation wards/rooms Personal Protective Equipment (e.g gloves, masks, gowns) Hand washing stations with soap and water Alcohol based hand sanitizer Disinfectants for surface cleaning Ambulance services for patient transfer Adequate electricity supply and backup generators	1	1	1	1	1
2025-07-12 09:12:01	2025-07-12 09:13:43	35	Female	Bachelor's degree	Nurses	Less than 5 years	Pediatrics	Yes	Colleagues/workplace	Very familiar	Fever Rash Headache Muscle aches Skin lesions	1	1	1	1	0	0	1	0	Contact with infected animals Direct contact with skin lesions of an infected person Touching contaminated objects or surfaces	1	1	0	0	1	0	Yes	Less serious	Yes	Very concerned	No	Agree	Not sure		Somewhat confident	Not sure	Isolation of infected patients Use of personal protective equipment Disinfection of contaminated surfaces Quarantine of suspected cases Vaccination	1	1	1	1	1	0	Personal Protective Equipment (e.g gloves, masks, gowns) Hand washing stations with soap and water Alcohol based hand sanitizer Disinfectants for surface cleaning Rapid response team or taskforce for outbreak management Ambulance services for patient transfer Adequate electricity supply and backup generators	0	1	1	1	1
2025-07-12 09:13:43	2025-07-12 09:14:55		Female	Bachelor's degree	Public Health Officer	Less than 5 years	Pediatrics	Yes	TV/Radio	Not familiar at all	Rash	0	1	0	0	0	0	0	0	Contact with infected animals	1	0	0	0	0	0	Yes	Equally serious	Yes	Very concerned	No	Strongly agree	No		Not confident at all	No	Quarantine of suspected cases	0	0	0	1	0	0	Personal Protective Equipment (e.g gloves, masks, gowns)	0	1	0	0	0
2025-07-12 09:14:55	2025-07-12 09:16:09	33	Female	Bachelor's degree	Nurses	5-10 years	Emergency Care	Yes	Colleagues/workplace	Very familiar	Fever Rash Headache Muscle aches Swollen lymph nodes	1	1	1	1	1	0	0	0	Contact with infected animals	1	0	0	0	0	0	Yes	Less serious	Yes	Very concerned	No	Agree	No		Very confident	Yes	Isolation of infected patients Use of personal protective equipment Disinfection of contaminated surfaces Quarantine of suspected cases Vaccination	1	1	1	1	1	0	Isolation wards/rooms Personal Protective Equipment (e.g gloves, masks, gowns) Hand washing stations with soap and water Alcohol based hand sanitizer Disinfectants for surface cleaning Ambulance services for patient transfer Adequate electricity supply and backup generators	1	1	1	1	1
[truncated: 27 more columns]
